# Supplementary material for: Phylogenomics and comparative genomics of Lactobacillus salivarius, a mammalian gut commensal
Source: PubMed Central journal article supplement (PMC5610712; doi:10.1099/mgen.0.000115), 2017-06-13
Supplement: mgen-3-115-s001.pdf [file mgen-3-115-s001.pdf]

## SUPPLEMENTARY TEXT

### METHODS

#### Quality assessment of genomes

Three additional quality control steps were performed on all genomes. First, the genomes were BLASTed (blastn v2.2.26+) [1] against a filtered version of the RDP database (v11.1) [2] that included only complete or near-complete 16S rRNA genes (>1400 bp) annotated to species level. This was carried out to confirm that the top hit for each assembly was an *L. salivarius* sequence in the RDP database and also to make sure that no other good hit (>1000 bp; identity  $\geq 97\%$ ) was found, which would indicate possible contamination. Second, 39 universal marker genes [3] were BLASTed (tblastn) against the contigs of each genome. The reasoning here was that all 39 marker genes should be fully assembled in a high-quality genome (which they were). Third, the contigs of each genome were assessed using Kraken (v0.10.6) [4] as a further test for possible contamination. The results of all 43 Kraken runs are shown in Table S4.

#### Assigning contigs to replicons

A common problem when analysing genes of interest in draft genomes is being able to tell whether a particular gene is present on the chromosome or on a plasmid. Since all of a contig must either be part of the chromosome or part of a plasmid, once a contig has been assigned to a replicon the genes present on the contig can also be assigned to the same replicon. We describe here the method used in this study to assign each contig to its most likely replicon.

A database of 92 plasmids (10 megaplasmids and 82 plasmids) from 16 *Lactobacillus* species was generated from complete genomes available on NCBI. Each draft genome was BLASTed (blastn v2.2.26+) against this database and the results were filtered in order to assign each contig to a plasmid or, failing plasmid assignment, to the chromosome. Megaplasmids (>10 kb; both circular and linear) and smaller plasmids (<10 kb) were included in the database so four categories of replicon were possible (including the chromosome).

To justify BLAST thresholds for assigning contigs to replicon categories, 4 complete genomes (UCC118, CECT5713, Ren and NIAS840) were broken up into contigs using a randomly generated chi-squared distribution with Degrees of Freedom equal to 1. This distribution was chosen because its median Spearman correlation with the distribution of lengths of contigs for each draft genome in our study was 0.96 (Q1 = 0.9; Q3 = 0.98; n = 38), ensuring that the artificial draft genomes would resemble the draft genomes in our dataset in terms of contig length distributions. The values of this distribution were then converted to proportions and randomly permuted in order to avoid a bias between contig length and genome region. Each genome was divided up based on the order of the randomly permuted proportions where each proportion is a fraction of the total number of base pairs in the genome. For each of the 4 complete genomes, each replicon was broken up into 50 contigs and contigs less than 200 bp were excluded. The FASTA header for each contig was labelled with the

39 replicon from which it was taken so that the specificity and sensitivity of the contig assignment  
40 method could be tested. The R (v3.2.3) code uploaded to figshare (Data Bibliography of main text;  
41 data file 5) shows the steps for generating 50 draft contigs from the complete chromosome sequence  
42 of UCC118.

43 The 4 artificial draft genomes were then BLASTed (blastn) against the database of 92  
44 plasmids. This was done for each genome separately so that the complete plasmids from each genome  
45 being BLASTed could be removed from the database beforehand. This ensured that draft plasmid  
46 contigs were not just aligning to the complete version of their own plasmids. An unfiltered evaluation  
47 of the BLAST results showed that the highest % alignment length of a chromosomal contig against  
48 the plasmid database was 23.7% (490/2,070). An alignment length of 25% against the plasmid  
49 database was therefore chosen as the cut-off for assigning contigs to plasmids. BLAST hits between  
50 two sequences can have multiple high-scoring pairs (HSPs) so the sum of the non-overlapping length  
51 of all HSPs between each contig and reference plasmid was calculated. The reference plasmid  
52 sequence with the highest % alignment to the contig was chosen and all alignments of less than 25%  
53 were excluded. Depending on their top hit, these remaining contigs were assigned to one of three  
54 categories: plasmid, circular megaplasmid or linear megaplasmid. It should be noted that small  
55 contigs representing transposases or other small repetitive regions may be present on both the  
56 chromosome and the plasmid(s) so the assignment of these contigs is less reliable. The sensitivity and  
57 specificity of the BLAST results for the 4 artificial draft genomes against the plasmid database are  
58 shown in Table S5. Code for calculating the sum of the non-overlapping length of HSPs between each  
59 contig and each reference plasmid has been uploaded to figshare (Data Bibliography of main text;  
60 data file 6).

61 As an additional quality check, three genes identified as being specific to the *L. salivarius*  
62 circular megaplasmid(5) - *repA* (LSL\_1739), *repE* (LSL\_1740) and *parA* (LSL\_1741) – were  
63 BLASTed (tblastn) against the contigs for each genome assembly to see if all top hits were to  
64 predicted megaplasmid contigs. Results are in Table S2.

65

## 66 **Specific functional groups**

67 COG categories for genes were predicted by BLASTing (blastp) amino acid sequences  
68 against a COG database (<ftp://ftp.ncbi.nih.gov/pub/COG/COG2014/data>) with thresholds of 40%  
69 identity, 50% alignment length of the query gene and a BLAST bit score of 60. Any gene match that  
70 fell below these thresholds was added to the COG category ‘unknown function’. For each genome,  
71 genes were assigned to their respective replicons.

72 Peptidases were predicted by BLASTing (blastp) amino acid sequences against full sequences  
73 from the MEROPS database (<https://merops.sanger.ac.uk>). BLAST thresholds used were 40%  
74 identity, 50% alignment length of the query gene and a BLAST bit score of 60.

75 Sortase genes were predicted using hmmscan from the HMMER3 (v3.1b1) [6] toolkit with  
76 the following downloaded sortase family HMM profiles:  
77 [http://nihserver.mbi.ucla.edu/Sortase/sortase\\_family\\_classification.hmm](http://nihserver.mbi.ucla.edu/Sortase/sortase_family_classification.hmm). A cut-off score of >30 was  
78 chosen to balance false positive and false negative predictions based on comparisons with the non-  
79 redundant NCBI and KEGG annotations. Genes with an LPXTG motif were predicted using hmmscan  
80 with a TIGRFAM [7] HMM profile (TIGR01167) and an e-value cut-off of 1e-05. The LOCP [8]  
81 webserver was used to locate putative pilus operons using default parameters. All three methods used  
82 amino acid sequences as input.

83 Glycosyl hydrolases and glycosyl transferases were predicted using hmmscan with DBcan [9]  
84 HMM profiles (<http://csbl.bmb.uga.edu/dbCAN/>). For each genome, GH and GT genes were assigned

85 to their respective replicons. A cut-off score of >30 was chosen to balance false positive and false  
86 negative predictions based on comparisons with non-redundant NCBI and KEGG annotation.

87 The Bagel3 [10] webserver was used to predict genetic loci for bacteriocin production and  
88 surrounding areas of interest (AOIs) using marker genes. For each genome, AOIs were sorted into  
89 their respective replicons.

90 CRISPRs were predicted using MinCED (v0.2.0), which was downloaded from the following  
91 link: <https://github.com/ctSkennerton/minced>. To predict cas genes associated with each CRISPR,  
92 hmmscan was used with cas-specific HMMs from TIGRFAM. CRISPRs that had no associated cas  
93 genes were labelled as 'undefined'. The same method used to build the core-gene phylogenetic tree  
94 was also used to build a tree from the amino acid sequences of the cas 1 (type-II and type-III) gene.

95 Genes involved in exopolysaccharide biosynthesis were predicted using the two EPS clusters  
96 of UCC118 as references. This was the only functional group that relied on a reference genome and it  
97 was used in order to give an overview of EPS genetic diversity in *L. salivarius* since a much larger,  
98 more detailed study is being conducted on the intra-specific diversity and functionality of EPS  
99 clusters in *L. salivarius* (Bourin *et al*; in preparation). Amino acid sequences of the UCC118 EPS  
100 genes were BLASTed (tblastn) against contigs with thresholds of 40% identity, 50% alignment length  
101 of the query gene and a BLAST bit score of 60. BLAST hits were then manually curated, taking note  
102 of UCC118 EPS genes present in multiple copies (in the case of transposases) and genes that passed  
103 the thresholds but were located in very different regions of the genome than the other predicted EPS  
104 genes.

105 Signal peptides were predicted using SignalP (v4.1) [11] with default parameters for gram-  
106 positive bacteria. Transmembrane domains were predicted using TMHMM (v2.0) [12] and all  
107 predictions with more than 10 expected amino acids in transmembrane helices in the first 60 amino  
108 acids were excluded from the results due to their likelihood of being signal peptides (see Instructions  
109 at <http://www.cbs.dtu.dk/services/TMHMM/>).

110 Antibiotic resistance (AR) genes were predicted using an AR reference gene set from the  
111 Comprehensive Antibiotic Resistance Database (CARD; v1.09) [13]. Within the CARD database, the  
112 FASTA file denoted 'protein homolog model' was filtered to include only complete genes and then  
113 genes were translated from nucleotide to amino acid sequences. Amino acid sequences for each  
114 genome were BLASTed against this database and filtered at 40% identity, 50% alignment length of  
115 the query gene and a BLAST score of 60.

116 Potential virulence factors (VF) were predicted using a version of the virulence factor  
117 database (VFDB) [14], which was downloaded from the following link:  
118 [http://www.mgc.ac.cn/VFs/Down/VFDB\\_setA\\_pro.fas.gz](http://www.mgc.ac.cn/VFs/Down/VFDB_setA_pro.fas.gz). This database is the core dataset and  
119 contains virulence factor genes that have been experimentally verified only - the full database was not  
120 used in order to minimise the number of false positive gene predictions. Amino acid sequences for  
121 each genome were BLASTed against the database and filtered at 70% identity and 90% alignment  
122 length of the query gene. More stringent cut-off values were used for virulence factors compared with  
123 antibiotic resistance genes because using BLAST to identify homologous genes based on the VF  
124 database is known to produce false positives at lower cut-off values.

125 Prophages were predicted using VIRSorter (v1.0.2) [15] where predicted regions with the  
126 lowest confidence (category 3; 'not so sure') for both complete phage contigs and prophages were  
127 excluded. Predicted phage genes for the remaining categories were assigned to COG categories (the  
128 same COG database used for the general COG analysis) using blastp with thresholds of 40% identity,  
129 50% alignment length of the query gene and a BLAST bit score of 60. Any gene that fell below these  
130 thresholds was added to the COG category 'unknown function'.

131 Transposases were predicted using hmmscan with TnpPred [16] HMM profiles downloaded  
132 from the following link: <http://www.mobilomics.cl/>. An e-value cut-off of 1e-05 was used. For each  
133 genome, predicted transposases were assigned to their respective replicons.

134 Bile salt hydrolase genes were predicted using a subset of the KEGG database where the EC  
135 number 3.5.1.24 was used to select bile salt hydrolase genes. Amino acid sequences were BLASTed  
136 (blastp) against this database with thresholds of 40% identity, 50% alignment length of the query (and  
137 reference) gene and a BLAST bit score of 60. These genes were then BLASTed against each other to  
138 give a pairwise BLAST score for each pair of bile salt hydrolase genes.

139 All statistics and data visualisation were carried out in R (v3.2.3) [17]. R packages used  
140 during this study were MADE4 [18] and SeqinR [19].

## 143 **RESULTS AND DISCUSSION**

### 144 **The core-gene phylogenetic tree of *L. salivarius* has similar sub-clade 145 topology to POCP clusters, but overall tree topology is dissimilar**

146 Percentage of Conserved Proteins (POCP) [20] calculates a similarity score based on  
147 percentage of genes in common between all the amino acid sequences in two genomes. POCP was  
148 designed as a method to identify whether a particular species belongs within a genus. We were not  
149 interested in applying this threshold since all strains obviously fall within a single genus; instead, the  
150 goal was to assess the congruency of a core-gene phylogeny with a method that clustered the strains  
151 based on the presence and absence of genes. Fig. S3 shows a heatmap of POCP values, where  
152 clustering of strains is in reasonable agreement with the core-gene phylogeny of Fig. 2 in terms of  
153 sub-clades. Several strains cluster apart from their core-gene sub-clades including CECT5713 and  
154 CCUG38008. A greater difference between POCP and the core-gene tree versus ANI and the core-  
155 gene tree is expected because POCP value calculations ignore homologous regions, using similarity  
156 based on gene presence and absence distributions to cluster strains. This is a rough approximation of  
157 the combined effect of gene decay and HGT since a gene that is present in one strain and absent in  
158 another has either acquired a deleterious mutation or else has been horizontally transferred by one of  
159 several mechanisms. The reason why many of the sub-clades in Fig. S3 agree with the core-gene  
160 phylogeny is that the probability of gene decay or HGT events having occurred after two strains start  
161 to diverge from a common ancestor increases with time. Adaptation to different niches and differing  
162 selection pressures then start to disrupt the correlation between core-gene phylogeny and clustering of  
163 shared/unshared genes [21]. We found no general association of clusters from any tree generated in  
164 this study with the isolation sources of the strains (Table S1), but members of several small clusters  
165 were all isolated from the same source. This overall lack of niche-strain association may be due to the  
166 transient appearance of *L. salivarius* in niches associated with the gastro-intestinal tract (food,  
167 opportunistic infection of body sites, etc.) and it would be a mistake to assume that every strain has  
168 acquired niche-specific adaptations to its source of primary isolation.

### 171 **Protease genes show no variation or considerable variation depending on 172 MEROPS protease family**

173 Proteases are a large group of proteins, divided into many families that are involved in the  
174 hydrolysis of peptides. Fig. S4 shows 53 protease families that display variation across the 43  
175  
176



177 genomes in this dataset. Genes for eighteen additional protease families were predicted in *L.*  
178 *salivarius*, but these families showed no variation across the strains, with 17 represented by a single  
179 gene per strain (A01A, C108, C14B, C19, C46, I04, I87, M02, M10A, M13, M15D, M20B, M20D,  
180 M24A, S09A, S09B, T05, T06) and one, a cysteine protease (C19) described as ‘ubiquitin-specific’  
181 by the MEROPS database (Table S6), represented by two genes per strain. It can be speculated that  
182 these 18 families are subjected to purifying selection since the remaining 53 protease families vary  
183 both in gene count and in presence and absence across the strains.

184 Out of the 53 protease families that vary in their distributions, 33 are present in all 43  
185 genomes, but have variable gene counts; genes for thirty of these are found on the chromosome only  
186 while the remaining three are present on multiple replicons. The gene count per protease family  
187 ranges from 0 to 24 where some families are present in all but a single genome and other families are  
188 present in one only (usually DSM18933 – the strain of *L. hayakitensis* used in this study). The  
189 protease family with the most genes in *L. salivarius* (4-24) is M23B, which is annotated as a  
190 lysostaphin in the MEROPS database (Table S6), an antibacterial enzyme that degrades peptidoglycan  
191 in the cell walls of certain bacteria, staphylococci in particular.

192 There are a number of protease families and protease inhibitors that are rare in the dataset of  
193 *L. salivarius* annotations, with representatives belonging to one or several genomes only. JCM1046  
194 has gene products in two families that the other strains do not have – I75 and S26B – both relevant  
195 genes predicted to reside on the chromosome. The gene encoding I75 is on a small contig of 964 bp  
196 that has a 99% match over its full length to a phage from *E. coli*, suggesting recent acquisition of this  
197 sequence as a prophage. The only other predicted protease inhibitor, I63, is an inhibitor of pappalysin-  
198 1 and it is present in all *L. salivarius* genomes but absent from *L. hayakitensis* DSM18933. S26B is a  
199 signal peptidase that cleaves signal peptides from a secreted protein as it is being translated.  
200 DSM18933 has 2 protease families that are not present in *L. salivarius*, which suggests that they were  
201 either horizontally acquired by *L. hayakitensis* after the split from its common ancestor with *L.*  
202 *salivarius* or else that *L. salivarius* subsequently lost these families through gene decay, whether  
203 through genetic drift or active selection pressure. These two families are M42 and M60, a glutamyl  
204 aminopeptidase and an enhancin, respectively.

205 Sun *et al* conducted a genus-wide, comparative genomic study of lactobacilli and found  
206 considerable variation in cell-envelope proteases [22]. Our study shows that a more general overview  
207 of protease families reflects the high levels of variation seen in *Lactobacillus*, at the species level, in  
208 *L. salivarius*.

## 210 **Prophages, CRISPRs and insertion sequences are widely distributed across** 211 ***L. salivarius* but no obvious association exists between them**

212  
213 Two agents of HGT that affect both the bacterial chromosome and extrachromosomal  
214 replicons are bacteriophages and insertion sequences (consisting primarily of a transposase gene).  
215 Bacteriophages are ubiquitous among bacterial communities and phage-host dynamics has been  
216 shown to stabilise diversity within a community [23] as well as to drive the arms race between the  
217 evolution of bacterial defences (often in the form of CRISPR-cas systems) and the counter-evolution  
218 of phage structures that neutralise those defences [24]. Insertion sequences (IS) have been implicated  
219 in the horizontal transfer of a wide range of functions and are noted for their role in conferring niche-  
220 specific advantages to bacteria, allowing the persistence of strains or species in new environments that  
221 were previously uninhabitable [25].

222 Fig. S5 shows a heatmap of predicted prophage genes (COGs) and Fig. S6 shows a barplot  
223 of prophage counts. Nine strains (2 sub-clades of 4 strains each and JCM1230) lack predicted

224 prophages; it is unlikely that these 9 strains have no history of interacting with bacteriophages -  
225 instead, VirSorter has failed to predict relatively intact prophages in the genomes of these strains.  
226 Canchaya *et al* summarise the relationship between bacteria and prophages by writing that prophages  
227 are lost from bacterial genomes as easily as they are acquired [26]. There is no clear association of the  
228 two sub-clades with a single niche, although the human oral cavity is the isolation source of 5 of these  
229 strains and the other 4 were isolated from the mammalian intestine. It is tempting to suggest that the  
230 oral environment selects against the persistence of prophages; however, Edlund *et al* describe the oral  
231 cavity as the perfect portal for viruses to access the oral microbial community [27] and previous  
232 studies have shown that it is host to a diverse community of phages [28, 29].

233 The COG category in Fig. S5 with by far the most genes is ‘Function unknown’ (S) with a  
234 mean average gene count of 61.3 compared with the second highest - ‘General function prediction  
235 only’ - of 3. The size of these categories emphasises the limits of current knowledge regarding  
236 bacteriophage gene function. There is a correlation between number of predicted prophages and  
237 number of prophage genes (Spearman;  $\rho = 0.78$ ;  $p < 0.001$ ), which is largely expected and  
238 highlights the size constraints on phages that infect *L. salivarius* since number of prophages, not  
239 phage type, approximately accounts for number of prophage genes. Some of the COG categories that  
240 are least abundant in predicted prophages are those involved in cell-specific functions such as cell  
241 motility (N) and secretion (U). The distribution of the remaining COG categories across the strains is  
242 indicative of the dynamic nature between bacteria and their phages, with considerable intra-species  
243 variation suggesting that the prophage complement of the ancestor of *L. salivarius* does not resemble  
244 any of the currently extant strains since their repertoire of prophages is so distinct.

245 Table S7 describes the distribution of CRISPRs across the 43 genomes as well as their  
246 associated cas genes. All CRISPRs are located on the chromosome, highlighting their role in  
247 protecting against extrachromosomal sequences. Almost all strains in this dataset have either the type-  
248 II or type-III CRISPR-cas system (or both), identified by the cas 9 or cas 10 gene, respectively, and 6  
249 strains have no identified CRISPRs. The presence of either type-II or type-III CRISPR-cas systems  
250 show some clustering on the core-gene tree in Fig. 2: the DSM20555<sup>T</sup> sub-clade consisting of 4 strains  
251 all have the type-III system only while the CECT5713 (6 strains) and UCC118 (4 strains) sub-clades  
252 have the type-II system only; the AH43348 sub-clade (6 strains), in contrast, has both type-II and  
253 type-III systems. The partial clustering of CRISPR-cas systems according to the core-gene tree is  
254 supported by Fig. S7, which shows a maximum-likelihood tree of the cas 1 gene for type-II CRISPR-  
255 cas, providing evidence of CRISPR-cas systems being acquired and maintained in the common  
256 ancestors of these sub-clades. The 6 strains with no CRISPRs show some clustering on the core-gene  
257 tree in Fig. 2, but JCM1045 and DSM18933 are singletons. The absence of CRISPR-cas systems does  
258 not have an obvious association with niche or the presence of prophages, suggesting that the  
259 interaction between CRISPR-cas systems, bacteriophages and the environment is far from  
260 straightforward. There are also 6 undefined CRISPRs from 4 strains that could not be described due to  
261 the absence of cas genes in close proximity. These CRISPRs are probably degraded systems that are  
262 no longer functional since all functioning CRISPR-cas systems have the cas 1 gene, which is involved  
263 in recognition and cleavage of invading DNA.

264 Fig. S8 shows a heatmap of gene counts for insertion sequences across the 43 strains, divided  
265 up into their respective replicons. The most striking thing about this figure is the inter-strain diversity  
266 of transposases, both within and between replicons. The gene counts for each transposase family in a  
267 specific strain on a particular replicon range from 0 to 52, highlighting the considerable variation in  
268 copy number displayed by these horizontally transferred sequences. The majority of transposases have  
269 copies on the chromosome and the plasmids, suggesting that they utilise the conjugative ability of  
270 plasmids to increase their abundance within and between species. The distributions of the IS families  
271 follow different patterns, from being widely spread over all three replicon groups (IS3) to being

272 limited to the chromosome and megaplasmid (IS21) to being confined to the smaller plasmid(s)  
273 (IS256). The only IS family confined to the chromosome is IS1 in a single strain - NIAS840.

274 The multi-replicon distribution of IS families implies that there is strong selection pressure on  
275 insertion sequences to transpose regularly from chromosomes to plasmids and vice versa, perhaps  
276 being partly responsible for the fact that transposases are currently considered to account for the most  
277 abundant gene families in both prokaryotes and eukaryotes [30]. The widespread distribution of IS3 in  
278 *L. salivarius* replicons is mirrored by its abundance (539 genes across the 43 strains); it is also the  
279 only family to consist of two sub-families - IS3 and IS150. Similarly, the other IS families with the  
280 widest distributions - ISL3, IS21 and IS200 - also have the greatest abundances after IS3, although  
281 IS21 is absent from the smaller plasmids even if it is ubiquitous on the *L. salivarius* chromosome.

282 Overall, IS families with a higher copy number in this dataset show a strong correlation with  
283 how many strains (and replicons per strain) harbour them (Spearman;  $\rho = 0.95$ ;  $p < 0.001$ ), showing  
284 that insertion sequences do not have a tendency to just replicate within a single replicon without  
285 undergoing regular HGT. Out of the 19 IS families present in the TnpPred database  
286 (<http://www.mobilomics.cl/>), 14 are identified in *L. salivarius* in this study. This emphasises the  
287 ability of transposases to transfer themselves within and between species, leading to greater sequence  
288 diversity and, when they carry additional genes with them, greater functional diversity as well.

289

## 290 **Protein secretion and membrane-anchoring gene richness are not** 291 **associated with strain isolation source**

292

293 Fig. S9 shows a barplot with the number of genes containing signal peptides and trans-  
294 membrane domains in the 43 strains. Proteins belonging to these two functional groups play an  
295 important role in the interaction of a bacterium with its environment since they are either secreted  
296 from the cell or function as membrane-bound structures. The number of predicted genes with signal  
297 peptides and with trans-membrane domains range from 56 to 84 and from 33 to 54, respectively.  
298 There is no association between niche and the number of either of these functional groups, which is  
299 not entirely surprising. These results highlight once more the point made earlier that certain isolation  
300 sources of *L. salivarius* strains shouldn't be interpreted as the niches that each strain has adapted to  
301 over time - some strains might be acting as opportunists that don't persist in a given environment for  
302 long such as the *Lactobacillus* species from a 2007 study (mainly *L. rhamnosus*) that were isolated  
303 from the blood, cerebrospinal fluid, peritoneal fluid and intestinal fistula of immuno-compromised  
304 children [31].

305

306

## 307 **Most *L. salivarius* strains harbour genes for two bile salt hydrolases**

308 Fig. S10 shows a heatmap of BLAST scores for all the predicted bile salt hydrolase (Bsh)  
309 genes in the 42 *L. salivarius* strains. The ability to hydrolyse bile salts is a necessary trait for any  
310 bacterium that is adapted to traversing the initial sections of the gastro-intestinal tract in order to  
311 colonise the intestine. It is also a required function for probiotics since a potential probiotic without  
312 the ability to reach its target area (usually the colon) will be ineffective. All 42 *L. salivarius* strains  
313 have at least one Bsh gene while *L. hayakitensis* DSM18933 has none, suggesting that the common  
314 ancestor of *L. salivarius* and *L. hayakitensis* did not possess a Bsh gene, although it is possible that  
315 another strain of *L. hayakitensis* does harbour one or more; if this is the case then gene decay of the  
316 Bsh gene in DSM18933 is a likely explanation. Two Bsh genes - one on the chromosome and one on  
317 the megaplasmid - seems to be the typical organisation in *L. salivarius* as described by Claesson *et al*

318 [32] since 36 out of 42 strains fit this description. Four strains - CECT5713, JCM1230, LMG14476  
319 and LMG14477 - have a single Bsh gene located on the chromosome while 2 strains - cp400 and  
320 JCM1046 - have three BSH genes, both having two on the megaplasmid and one on the chromosome.

321 The presence of at least one Bsh in all 42 *L. salivarius* strains reinforces the point that this  
322 species is commonly isolated from the GIT of humans and animals. The variable number of Bsh genes  
323 and their presence on both the chromosome and the megaplasmid suggests that there is variability in  
324 bile resistance across the strains. This was shown in a study by Fang *et al*, but they cautioned that bile  
325 resistance is independent of the bsh1 allele type (the Bsh on the megaplasmid of most strains) and  
326 they go on to show that, upon exposure to bile and cholate, a transcriptome analysis reveals the up-  
327 regulation of numerous stress response and efflux proteins, which might mask the variable influence  
328 of Bsh allele types [33].

329 It should be noted that for the BLAST analysis of this category, a stricter cut-off value of 50%  
330 for coverage of both the query and reference genes was used. This was done because the number of  
331 BLAST hits to Bsh genes in the database contradicted previous literature so a closer agreement in  
332 protein length between query and reference sequences was enforced. It is possible that large  
333 discrepancies between the lengths of sequences in the database and sequences in the predicted *L.*  
334 *salivarius* gene repertoire led to false negative Bsh predictions. When the criteria are relaxed to  
335 include only 50% coverage of the query gene (and not the reference) an extra Bsh is predicted in some  
336 strains and these might actually be genuine Bsh genes that this study has excluded.

337

## 338 **Summary survey of virulence factors and antibiotic resistance genes**

339 Fig. S11 shows a barplot of the predicted number of putative antibiotic resistance genes (AR)  
340 and virulence factors (VF) across the 43 strains. VFs range from 2 to 3 genes and ARs range from 7 to  
341 16. Virulence and antibiotic resistance are two traits that are screened for when assessing the  
342 suitability of a strain to act as a probiotic [34] and these traits are particularly dangerous in clinical  
343 settings. Table S8 and Table S9 give a more detailed summary of these results for ARs and VFs,  
344 respectively, while data file 7 and data file 8 give the corresponding amino acid sequences in FASTA  
345 format (figshare; Data Bibliography of main text).

346 The most commonly predicted function for AR genes in this dataset is transport, specifically a  
347 subset of efflux pumps for such antibiotics as tetracycline, elfamycin, bacitracin, clindamycin,  
348 fosfomycin, dalfopristin and others. Efflux pumps evolved long before the advent of antibiotic usage  
349 in modern medicine and probably originated as a defence against toxic substances entering the cell  
350 [35] – a strategy that has more recently been used to confer antibiotic resistance to microbes from  
351 multiple drugs, leading to a health crisis in the effective treatment of infection with antibiotics.

352 Virulence factor identification depends very much on context; a probiotic trait in one setting  
353 can be labelled as a virulence factor in another - for instance, when a pathogen acquires the ability to  
354 survive intestinal transit in order to colonise the human colon. The most commonly predicted  
355 functions for VF genes in our dataset are for an ATP-dependent protease and a UDP-glucose  
356 pyrophosphorylase. Overall, there is a wide variety of functions for these potential VFs, both in the  
357 VF database and in the predicted functions for *L. salivarius*. This highlights the ongoing evolutionary  
358 competition between hosts and microbes, the defensive and counter-defensive adaptive traits that arise  
359 from unrelated proteins with an overlapping strategy – to evade host mechanisms and successfully  
360 colonise the host environment.

361

## 362 **REFERENCES**

- 364 1. **Altschul SF, Gish W, Miller W, Myers EW, Lipman DJ.** Basic local alignment search tool.  
365 *Journal of molecular biology.* 1990 Oct 5;215(3):403-10. PubMed PMID: 2231712. Epub 1990/10/05.  
366 eng.
- 367 2. **Olsen GJ, Overbeek R, Larsen N, Marsh TL, McCaughey MJ, Maciukenas MA, et al.** The  
368 Ribosomal Database Project. *Nucleic acids research.* 1992 May 11;20 Suppl:2199-200. PubMed  
369 PMID: 1598241. Pubmed Central PMCID: PMC333993. Epub 1992/05/11. eng.
- 370 3. **Wu D, Jospin G, Eisen JA.** Systematic Identification of Gene Families for Use as “Markers” for  
371 Phylogenetic and Phylogeny-Driven Ecological Studies of Bacteria and Archaea and Their Major  
372 Subgroups. *PLoS one.* 2013;8(10):e77033.
- 373 4. **Wood DE, Salzberg SL.** Kraken: ultrafast metagenomic sequence classification using exact  
374 alignments. *Genome Biology.* 2014;15(3):R46.
- 375 5. **Li Y, Canchaya C, Fang F, Raftis E, Ryan KA, van Pijkeren JP, et al.** Distribution of  
376 megaplasmids in *Lactobacillus salivarius* and other lactobacilli. *Journal of bacteriology.* 2007  
377 Sep;189(17):6128-39. PubMed PMID: 17586640. Pubmed Central PMCID: PMC1951925. Epub  
378 2007/06/26. eng.
- 379 6. **Finn RD, Clements J, Eddy SR.** HMMER web server: interactive sequence similarity searching.  
380 *Nucleic acids research.* 2011 Jul 1;39(Web Server issue):W29-37. PubMed PMID: 21593126.
- 381 7. **Haft DH, Selengut JD, White O.** The TIGRFAMs database of protein families. *Nucleic acids*  
382 *research.* 2003 Jan 1;31(1):371-3. PubMed PMID: 12520025.
- 383 8. **Plyusnin I, Holm L, Kankainen M.** LOCP—locating pilus operons in Gram-positive bacteria.  
384 *Bioinformatics* (Oxford, England). 2009 May 1, 2009;25(9):1187-8.
- 385 9. **Yin Y, Mao X, Yang J, Chen X, Mao F, Xu Y.** dbCAN: a web resource for automated  
386 carbohydrate-active enzyme annotation. *Nucleic acids research.* 2012 Jul;40(Web Server  
387 issue):W445-51. PubMed PMID: 22645317.
- 388 10. **van Heel AJ, de Jong A, Montalban-Lopez M, Kok J, Kuipers OP.** BAGEL3: Automated  
389 identification of genes encoding bacteriocins and (non-)bactericidal posttranslationally modified  
390 peptides. *Nucleic acids research.* 2013 Jul;41(Web Server issue):W448-53. PubMed PMID: 23677608.  
391 Pubmed Central PMCID: PMC3692055. Epub 2013/05/17. eng.
- 392 11. **Nielsen H, Engelbrecht J, Brunak S, von Heijne G.** Identification of prokaryotic and  
393 eukaryotic signal peptides and prediction of their cleavage sites. *Protein Engineering.* 1997 January  
394 1, 1997;10(1):1-6.
- 395 12. **Krogh A, Larsson B, von Heijne G, Sonnhammer EL.** Predicting transmembrane protein  
396 topology with a hidden Markov model: application to complete genomes. *Journal of molecular*  
397 *biology.* 2001 Jan 19;305(3):567-80. PubMed PMID: 11152613. Epub 2001/01/12. eng.
- 398 13. **McArthur AG, Wagglechner N, Nizam F, Yan A, Azad MA, Baylay AJ, et al.** The  
399 Comprehensive Antibiotic Resistance Database. *Antimicrobial Agents and Chemotherapy.* 2013 July  
400 1, 2013;57(7):3348-57.
- 401 14. **Chen L, Yang J, Yu J, Yao Z, Sun L, Shen Y, et al.** VFDB: a reference database for bacterial  
402 virulence factors. *Nucleic acids research.* 2005 Jan 1;33(Database Issue):D325-8. PubMed PMID:  
403 15608208.
- 404 15. **Roux S, Enault F, Hurwitz BL, Sullivan MB.** VirSorter: mining viral signal from microbial  
405 genomic data. *PeerJ.* 2015;3:e985. PubMed PMID: 26038737. Pubmed Central PMCID: PMC4451026.  
406 Epub 2015/06/04. eng.
- 407 16. **Riadi G, Medina-Moenne C, Holmes DS.** TnpPred: A Web Service for the Robust Prediction  
408 of Prokaryotic Transposases. *Comp Funct Genomics.* 2012;2012:5.
- 409 17. **R Core Team.** R: A language and environment for statistical computing. R Foundation for  
410 Statistical Computing, Vienna, Austria. URL <https://www.R-project.org/>. 2015.
- 411 18. **Culhane AC, Thioulouse J, Perriere G, Higgins DG.** MADE4: an R package for multivariate  
412 analysis of gene expression data. *Bioinformatics* (Oxford, England). 2005 Jun 1;21(11):2789-90.  
413 PubMed PMID: 15797915. Epub 2005/03/31. eng.



- 414 19. **Charif D, Lobry JR.** SeqinR 1.0-2: A Contributed Package to the R Project for Statistical  
415 Computing Devoted to Biological Sequences Retrieval and Analysis. In: Bastolla U, Porto M, Roman  
416 HE, Vendruscolo M, editors. Structural Approaches to Sequence Evolution: Molecules, Networks,  
417 Populations. Berlin, Heidelberg: Springer Berlin Heidelberg; 2007. p. 207-32.
- 418 20. **Qin QL, Xie BB, Zhang XY, Chen XL, Zhou BC, Zhou J, et al.** A proposed genus boundary for  
419 the prokaryotes based on genomic insights. *Journal of bacteriology*. 2014 Jun;196(12):2210-5.  
420 PubMed PMID: 24706738. Pubmed Central PMCID: PMC4054180. Epub 2014/04/08. eng.
- 421 21. **Winker K.** Reuniting Phenotype and Genotype in Biodiversity Research. *BioScience*. 2009  
422 September 1, 2009;59(8):657-65.
- 423 22. **Sun Z, Harris HM, McCann A, Guo C, Argimon S, Zhang W, et al.** Expanding the  
424 biotechnology potential of lactobacilli through comparative genomics of 213 strains and associated  
425 genera. *Nature commun*. 2015;6:8322. PubMed PMID: 26415554. Pubmed Central PMCID:  
426 PMC4667430. Epub 2015/09/30. eng.
- 427 23. **Rodriguez-Valera F, Martin-Cuadrado A-B, Rodriguez-Brito B, Pasic L, Thingstad TF, Rohwer  
428 F, et al.** Explaining microbial population genomics through phage predation. *Nat Rev Micro*. 2009  
429 11//print;7(11):828-36.
- 430 24. **Horvath P, Barrangou R.** CRISPR/Cas, the immune system of bacteria and archaea. *Science*  
431 (New York, NY). 2010 Jan 8;327(5962):167-70. PubMed PMID: 20056882. Epub 2010/01/09. eng.
- 432 25. **Ochman H, Lawrence JG, Groisman EA.** Lateral gene transfer and the nature of bacterial  
433 innovation. *Nature*. 2000 05/18/print;405(6784):299-304.
- 434 26. **Canchaya C, Fournous G, Brussow H.** The impact of prophages on bacterial chromosomes.  
435 *Molecular microbiology*. 2004 Jul;53(1):9-18. PubMed PMID: 15225299. Epub 2004/07/01. eng.
- 436 27. **Edlund A, Santiago-Rodriguez TM, Boehm TK, Pride DT.** Bacteriophage and their potential  
437 roles in the human oral cavity. *J Oral Microbiol*. 2015;7:27423. PubMed PMID: 25861745. Pubmed  
438 Central PMCID: PMC4393417. Epub 2015/04/12. eng.
- 439 28. **Hitch G, Pratten J, Taylor PW.** Isolation of bacteriophages from the oral cavity. *Lett Appl  
440 Microbiol*. 2004;39(2):215-9. PubMed PMID: 15242464. Epub 2004/07/10. eng.
- 441 29. **Pride DT, Salzman J, Haynes M, Rohwer F, Davis-Long C, White RA, III, et al.** Evidence of a  
442 robust resident bacteriophage population revealed through analysis of the human salivary virome.  
443 *ISME J*. 2012 05//print;6(5):915-26.
- 444 30. **Aziz RK, Breitbart M, Edwards RA.** Transposases are the most abundant, most ubiquitous  
445 genes in nature. *Nucleic acids research*. 2010 Jul;38(13):4207-17. PubMed PMID: 20215432. Pubmed  
446 Central PMCID: PMC2910039. Epub 2010/03/11. eng.
- 447 31. **Muszynski Z, Mirska I, Matuska K.** [*Lactobacillus* species as opportunistic pathogens in  
448 children]. *Przegląd epidemiologiczny*. 2007;61(1):79-84. PubMed PMID: 17702443. Epub  
449 2007/08/19. Paleczki z rodzaju *Lactobacillus*--czynnik zakazen oportunistycznych u dzieci. pol.
- 450 32. **Claesson MJ, Li Y, Leahy S, Canchaya C, van Pijkeren JP, Cerdeno-Tarraga AM, et al.**  
451 Multireplicon genome architecture of *Lactobacillus salivarius*. *Proc Natl Acad Sci USA*. 2006 Apr  
452 25;103(17):6718-23. PubMed PMID: 16617113. Pubmed Central PMCID: PMC1436024. Epub  
453 2006/04/18. eng.
- 454 33. **Fang F, Li Y, Bumann M, Raftis EJ, Casey PG, Cooney JC, et al.** Allelic variation of bile salt  
455 hydrolase genes in *Lactobacillus salivarius* does not determine bile resistance levels. *Journal of  
456 bacteriology*. 2009 Sep;191(18):5743-57. PubMed PMID: 19592587. Pubmed Central PMCID:  
457 PMC2737978. Epub 2009/07/14. Eng.
- 458 34. **Bennedsen M, Stuer-Lauridsen B, Danielsen M, Johansen E.** Screening for Antimicrobial  
459 Resistance Genes and Virulence Factors via Genome Sequencing. *Appl Environ Microbiol*. 2011  
460 Apr;77(8):2785-7. PubMed PMID: 21335393.
- 461 35. **Webber MA, Piddock LJV.** The importance of efflux pumps in bacterial antibiotic resistance.  
462 *J Antimicrob Chemother*. 2003 January 1, 2003;51(1):9-11.

**Fig. S1**

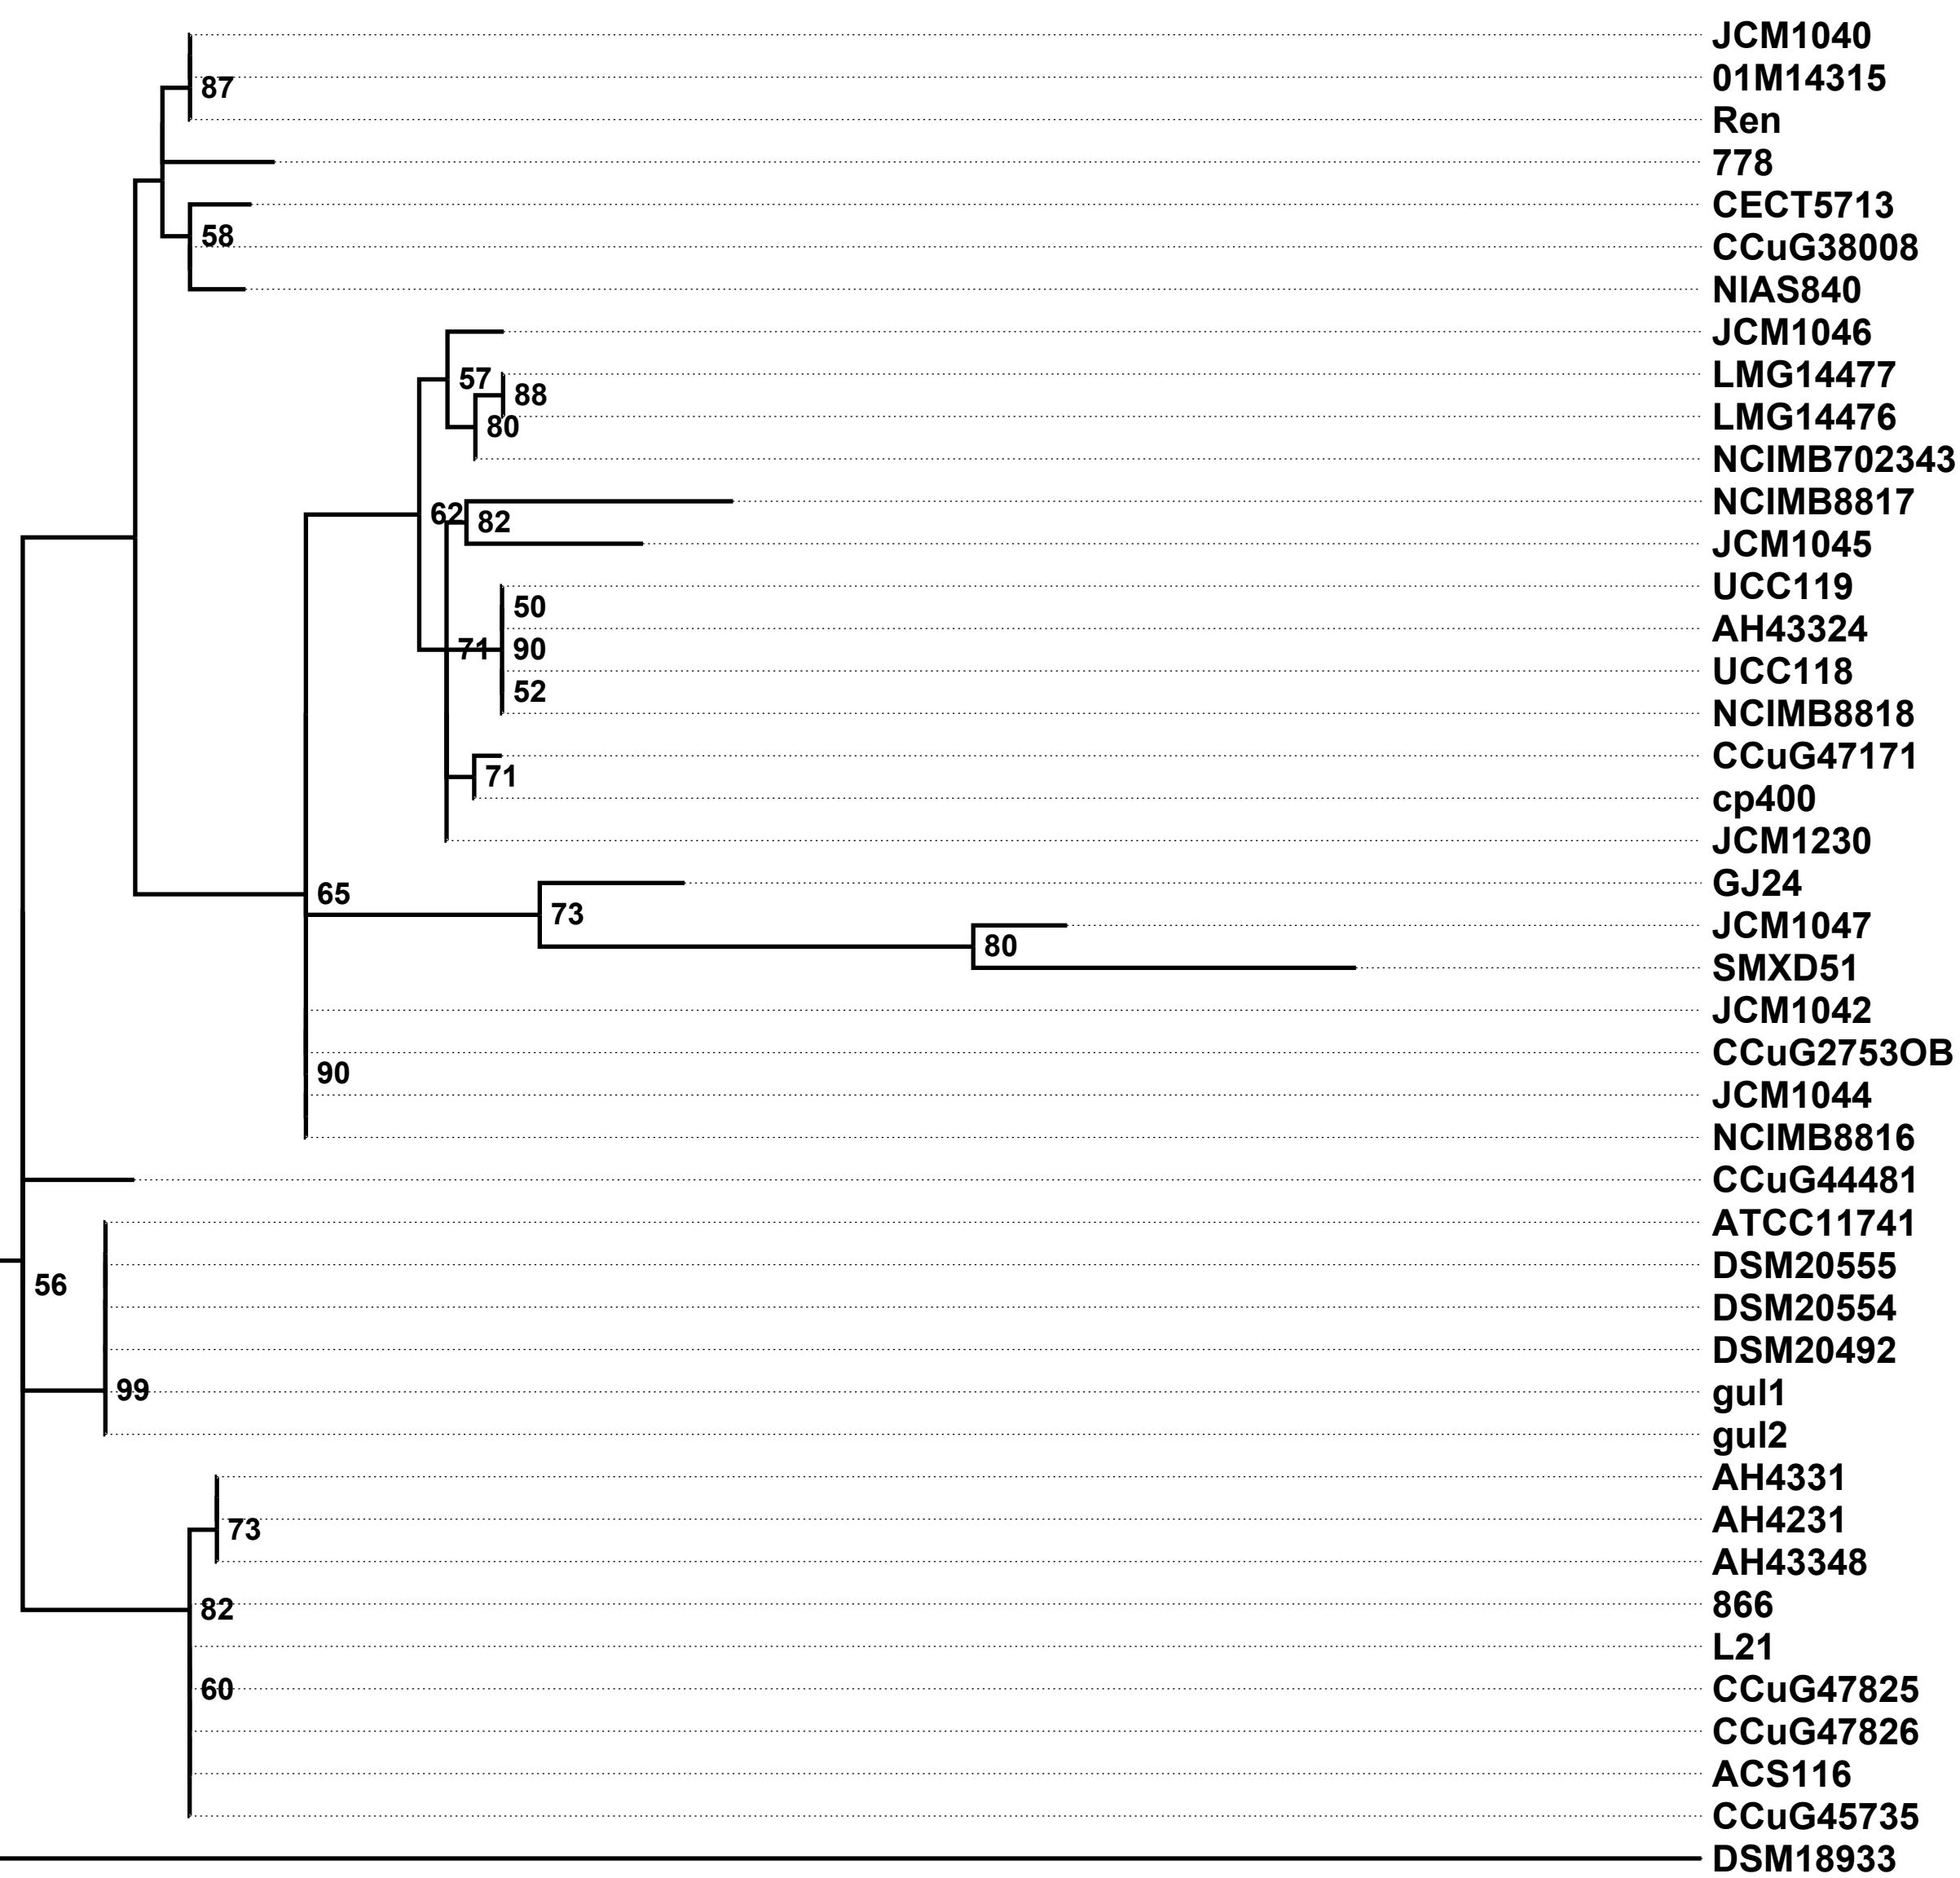

0.02

**Fig. S2**

**UCC118 EPS cluster 2**  
(32774 bps)

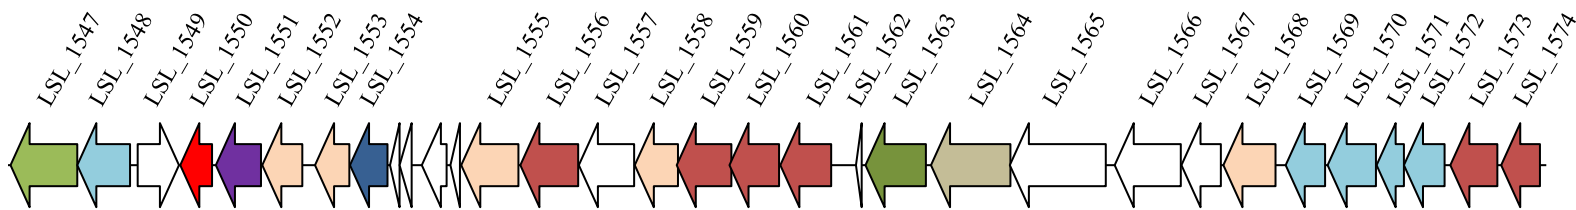

EPS cluster 2 group 1

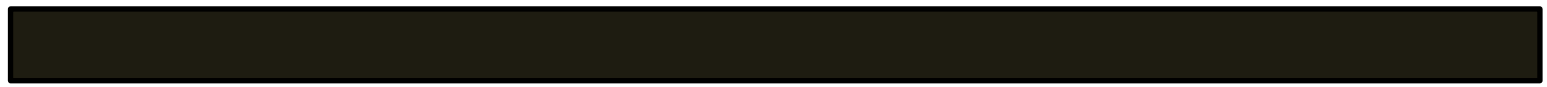

EPS cluster 2 group 2

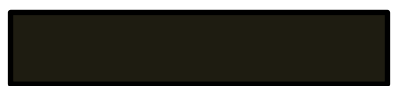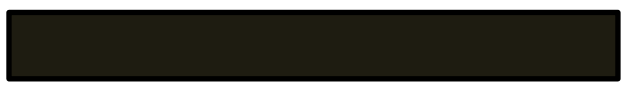

EPS cluster 2 group 3

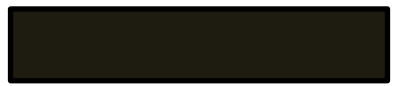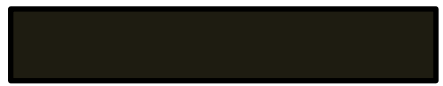

EPS cluster 2 group 4

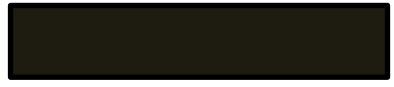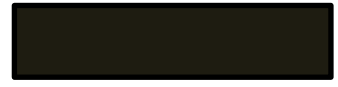

EPS cluster 2 group 5

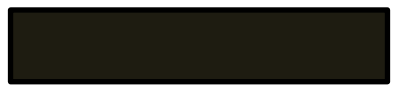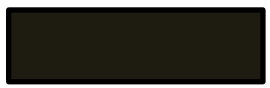

EPS cluster 2 group 6

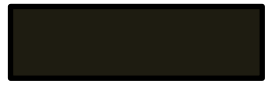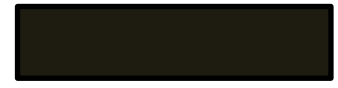

Fig. S3

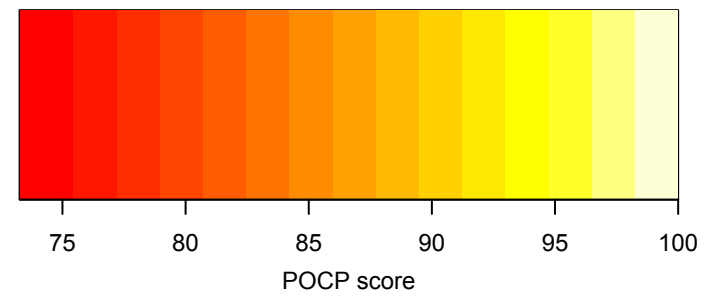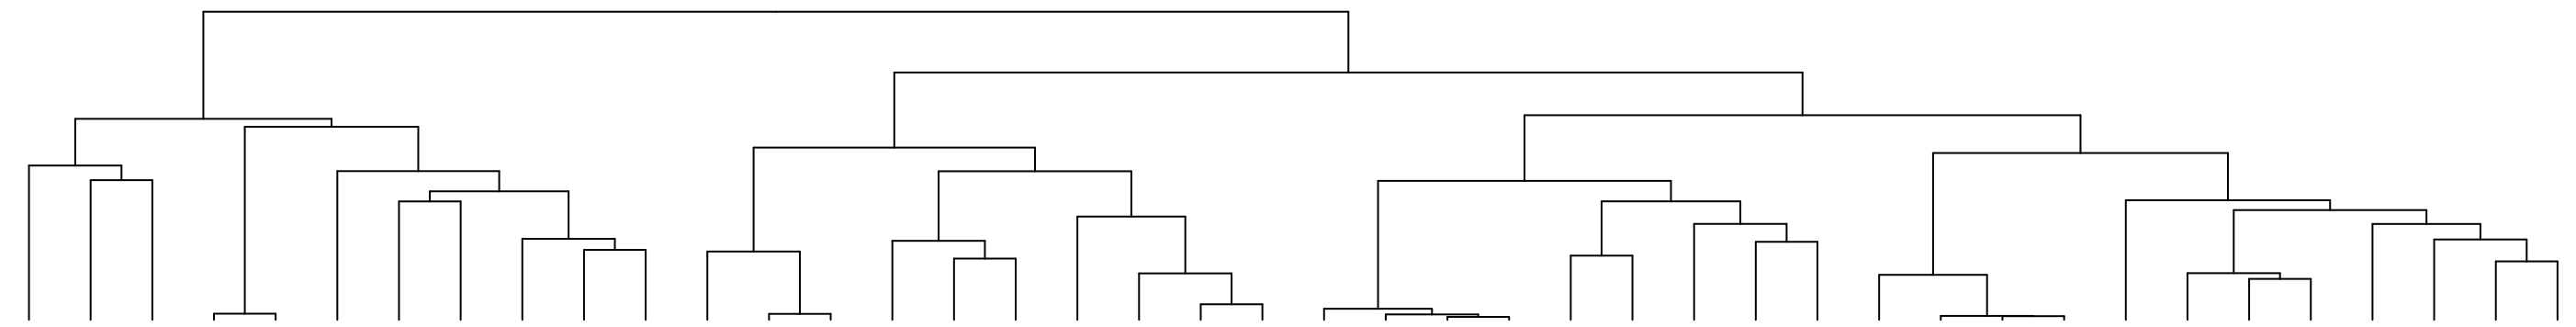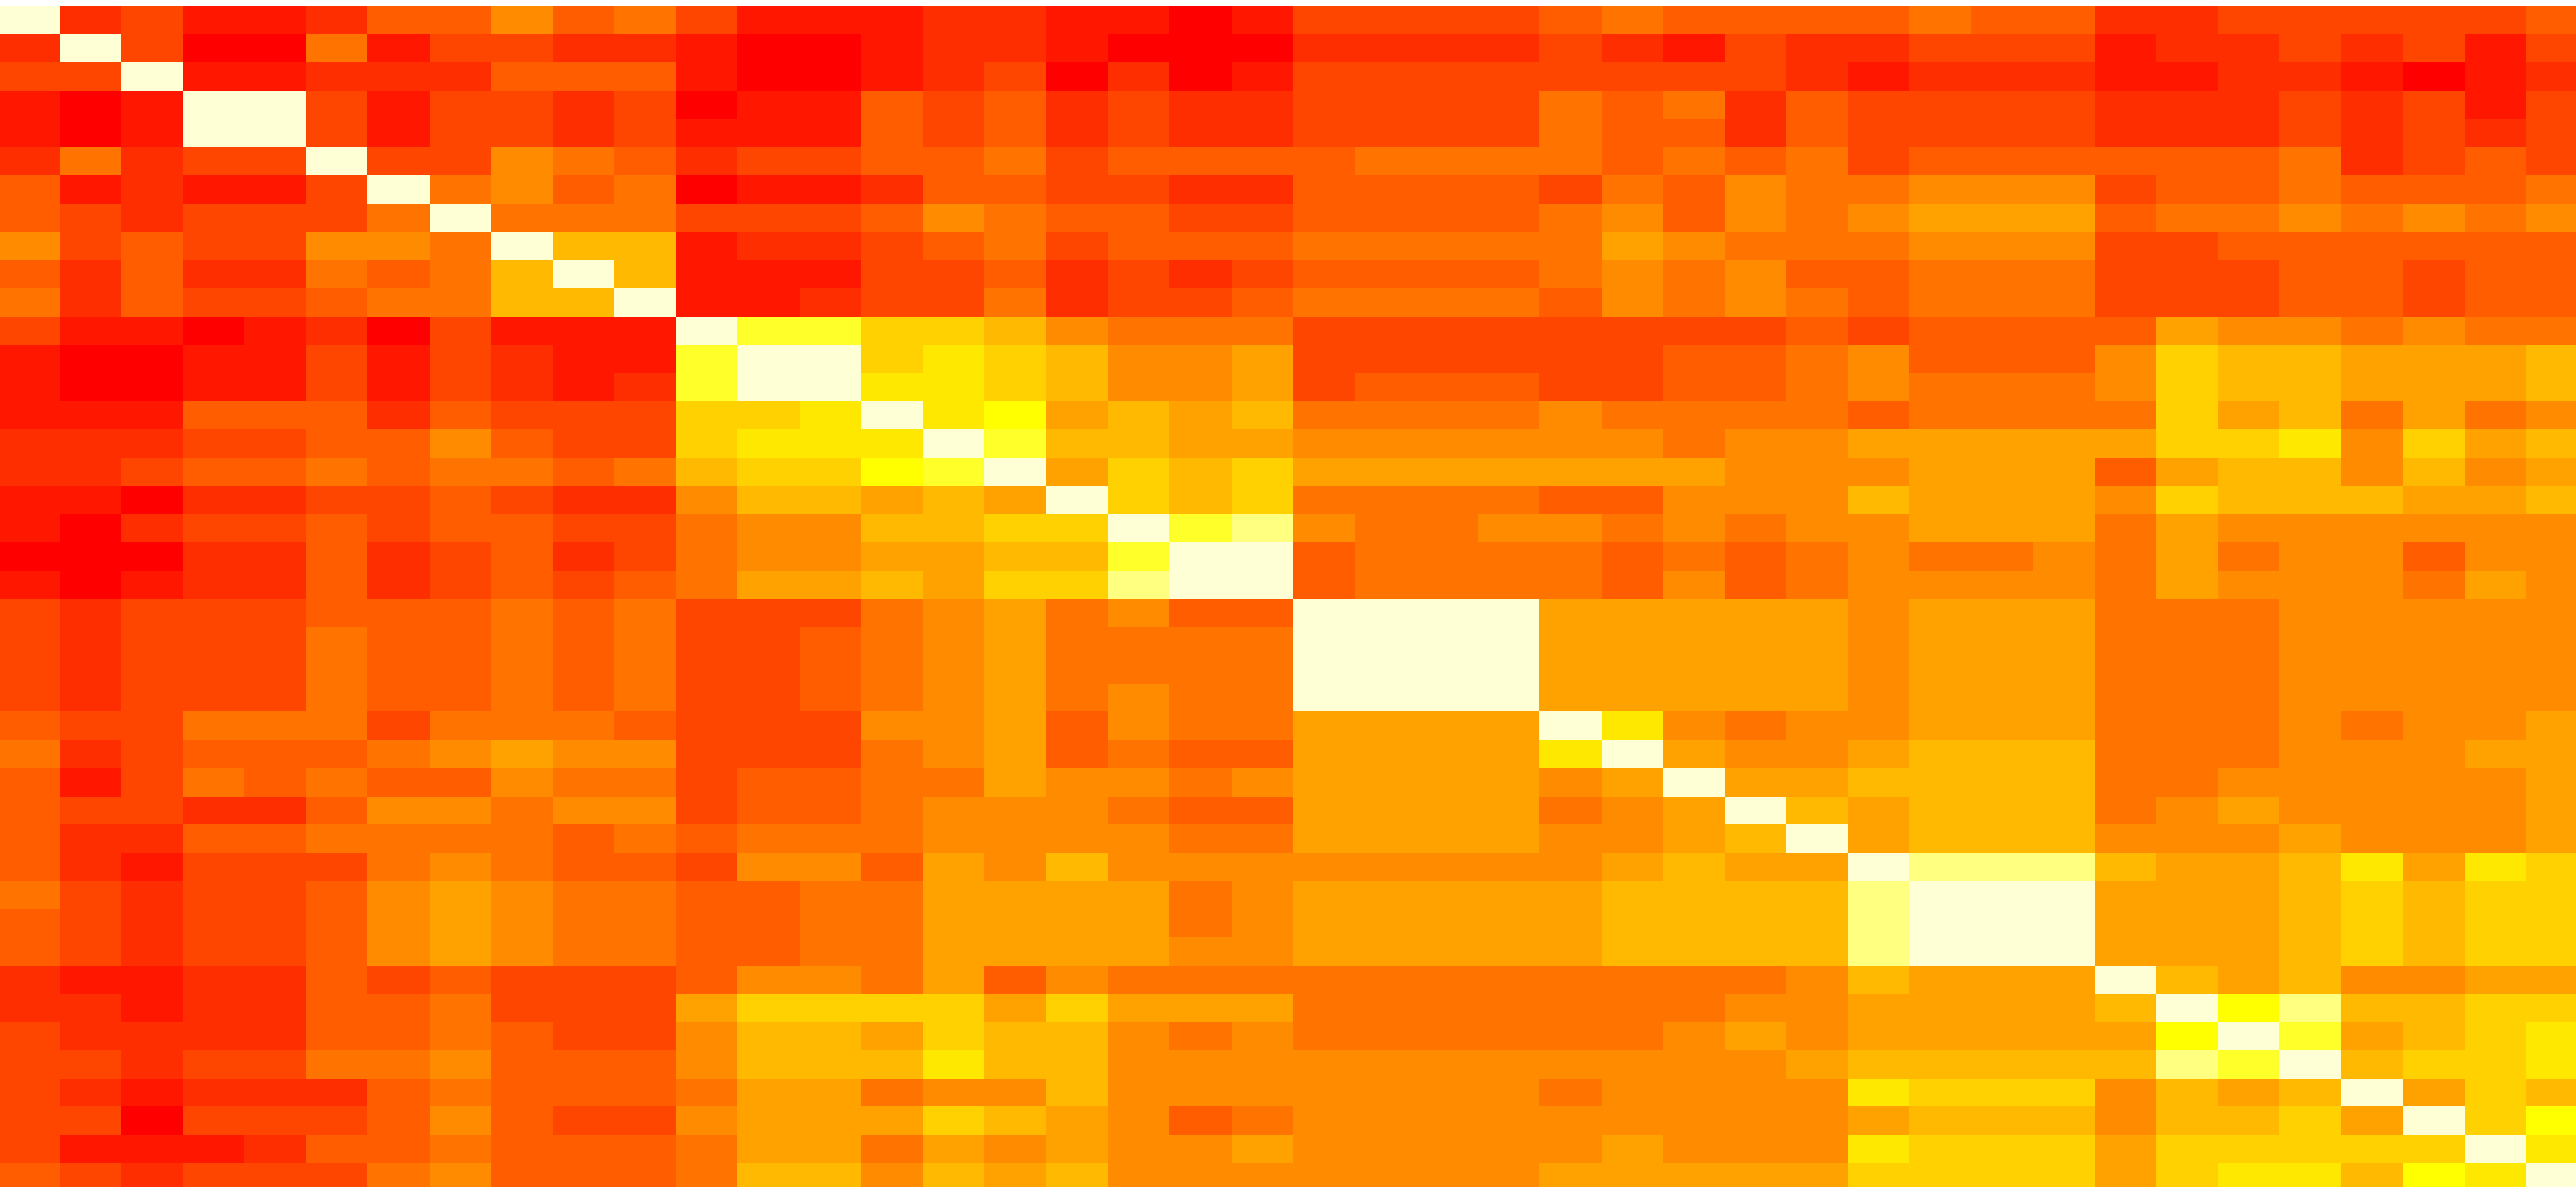

NIAS840  
JCM1046  
JCM1047  
LMG14477  
LMG14476  
cp400  
JCM1230  
NCIMB702343  
SMXD51  
CCuG44481  
GJ24  
AH43348  
AH4231  
AH4331  
ACS116  
CCuG45735  
866  
NCIMB8818  
AH43324  
CECT5713  
UCC118  
DSM20555  
ATCC11741  
gul1  
gul2  
DSM20554  
DSM20492  
778  
NCIMB8817  
JCM1045  
NCIMB8816  
JCM1044  
JCM1042  
CCuG2753OB  
CCuG47171  
CCuG47826  
L21  
CCuG47825  
CCuG38008  
01M14315  
Ren  
JCM1040

NIAS840  
JCM1046  
JCM1047  
LMG14477  
LMG14476  
cp400  
JCM1230  
NCIMB702343  
SMXD51  
CCuG44481  
GJ24  
AH43348  
AH4231  
AH4331  
ACS116  
CCuG45735  
866  
NCIMB8818  
AH43324  
CECT5713  
UCC118  
DSM20555  
ATCC11741  
gul1  
gul2  
DSM20554  
DSM20492  
778  
NCIMB8817  
JCM1045  
NCIMB8816  
JCM1044  
JCM1042  
CCuG2753OB  
CCuG47171  
CCuG47826  
L21  
CCuG47825  
CCuG38008  
01M14315  
Ren  
JCM1040

Fig. S4

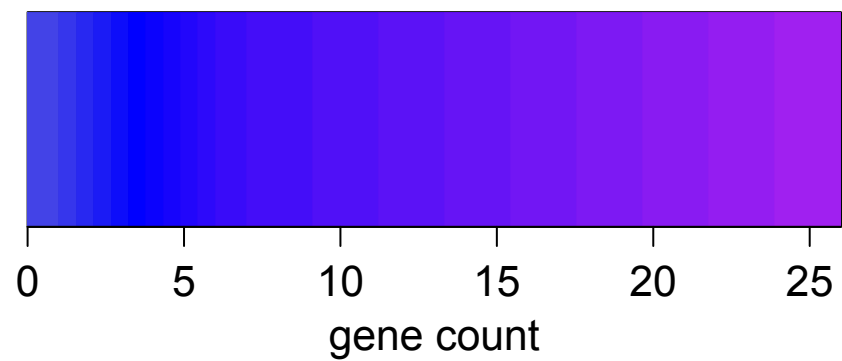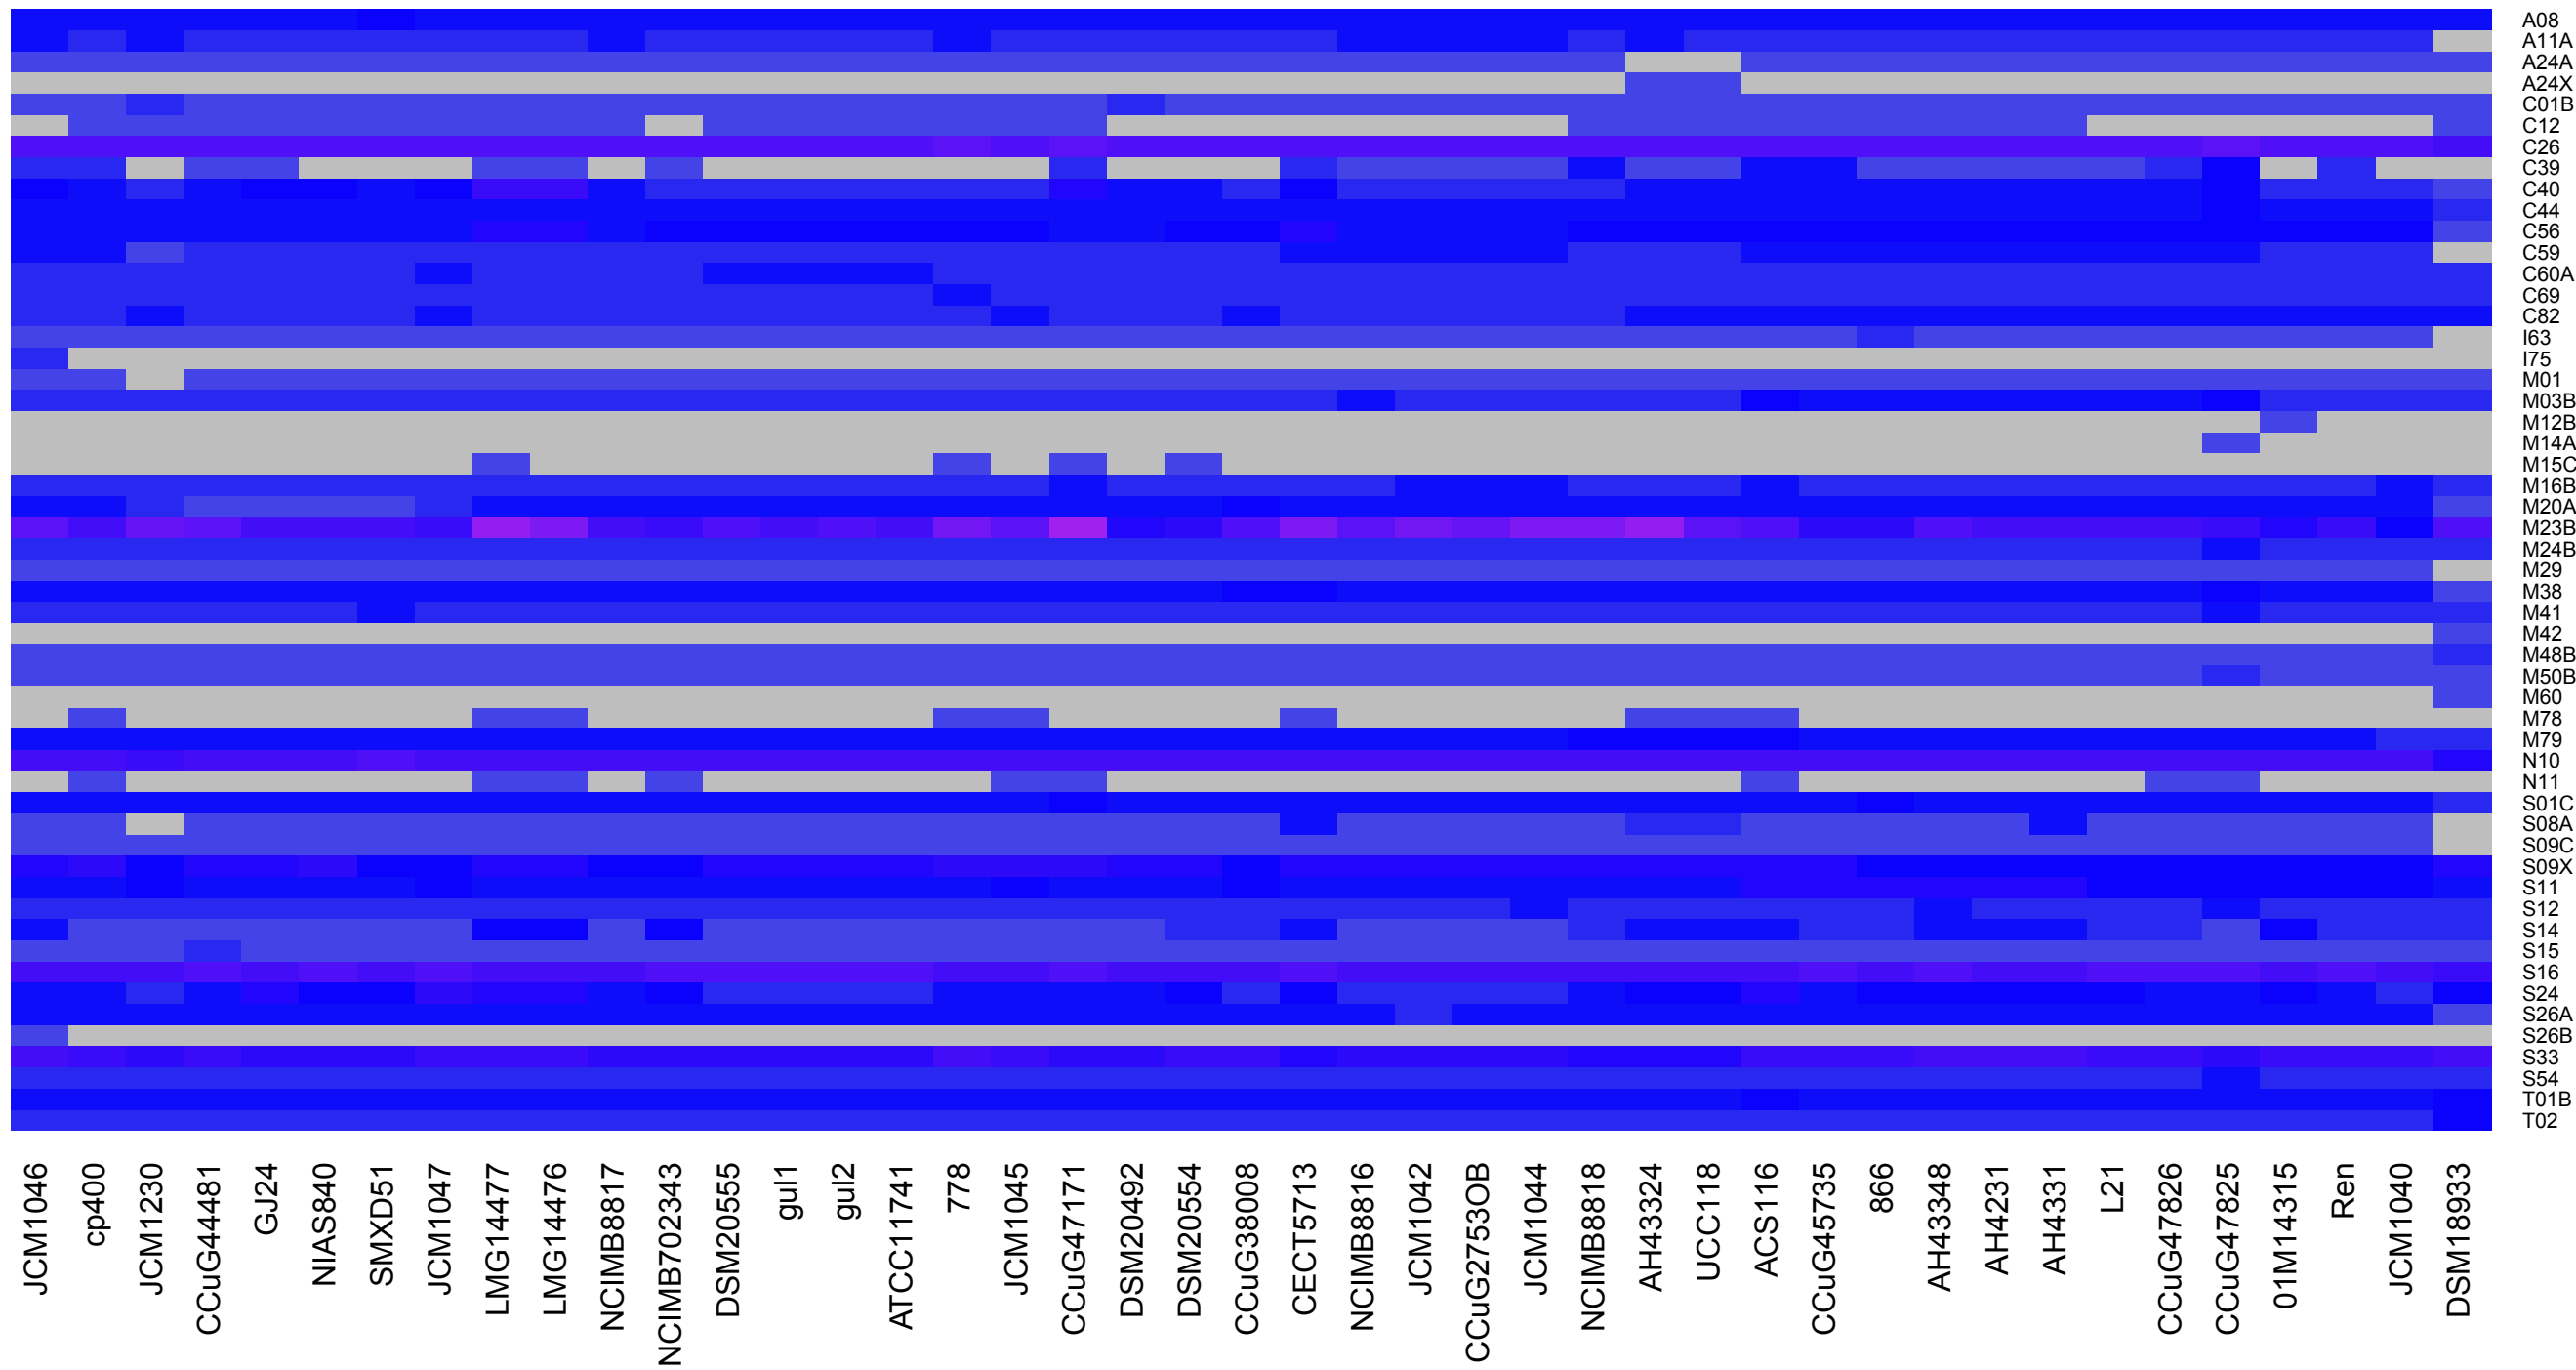





Fig. S6

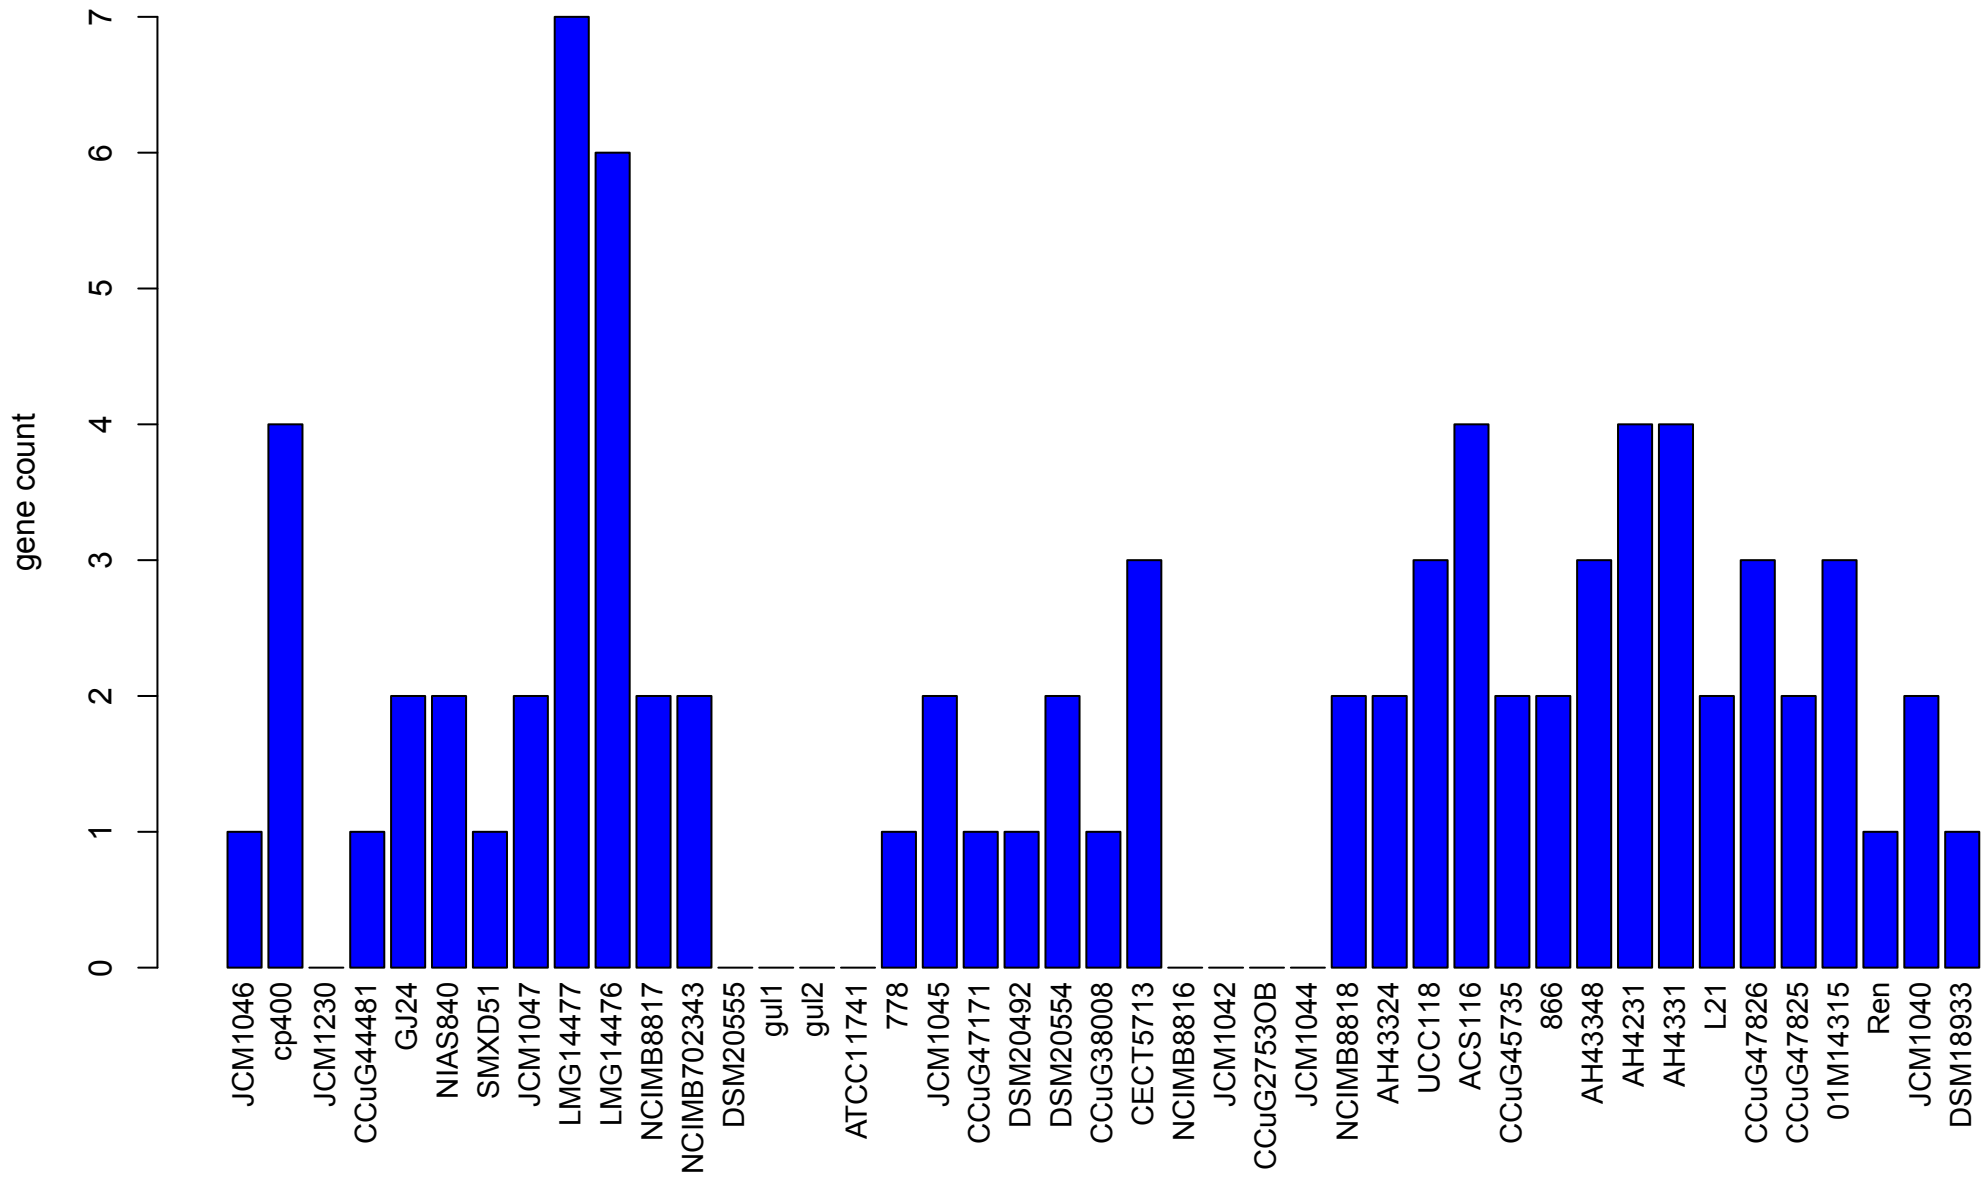

Fig. S7

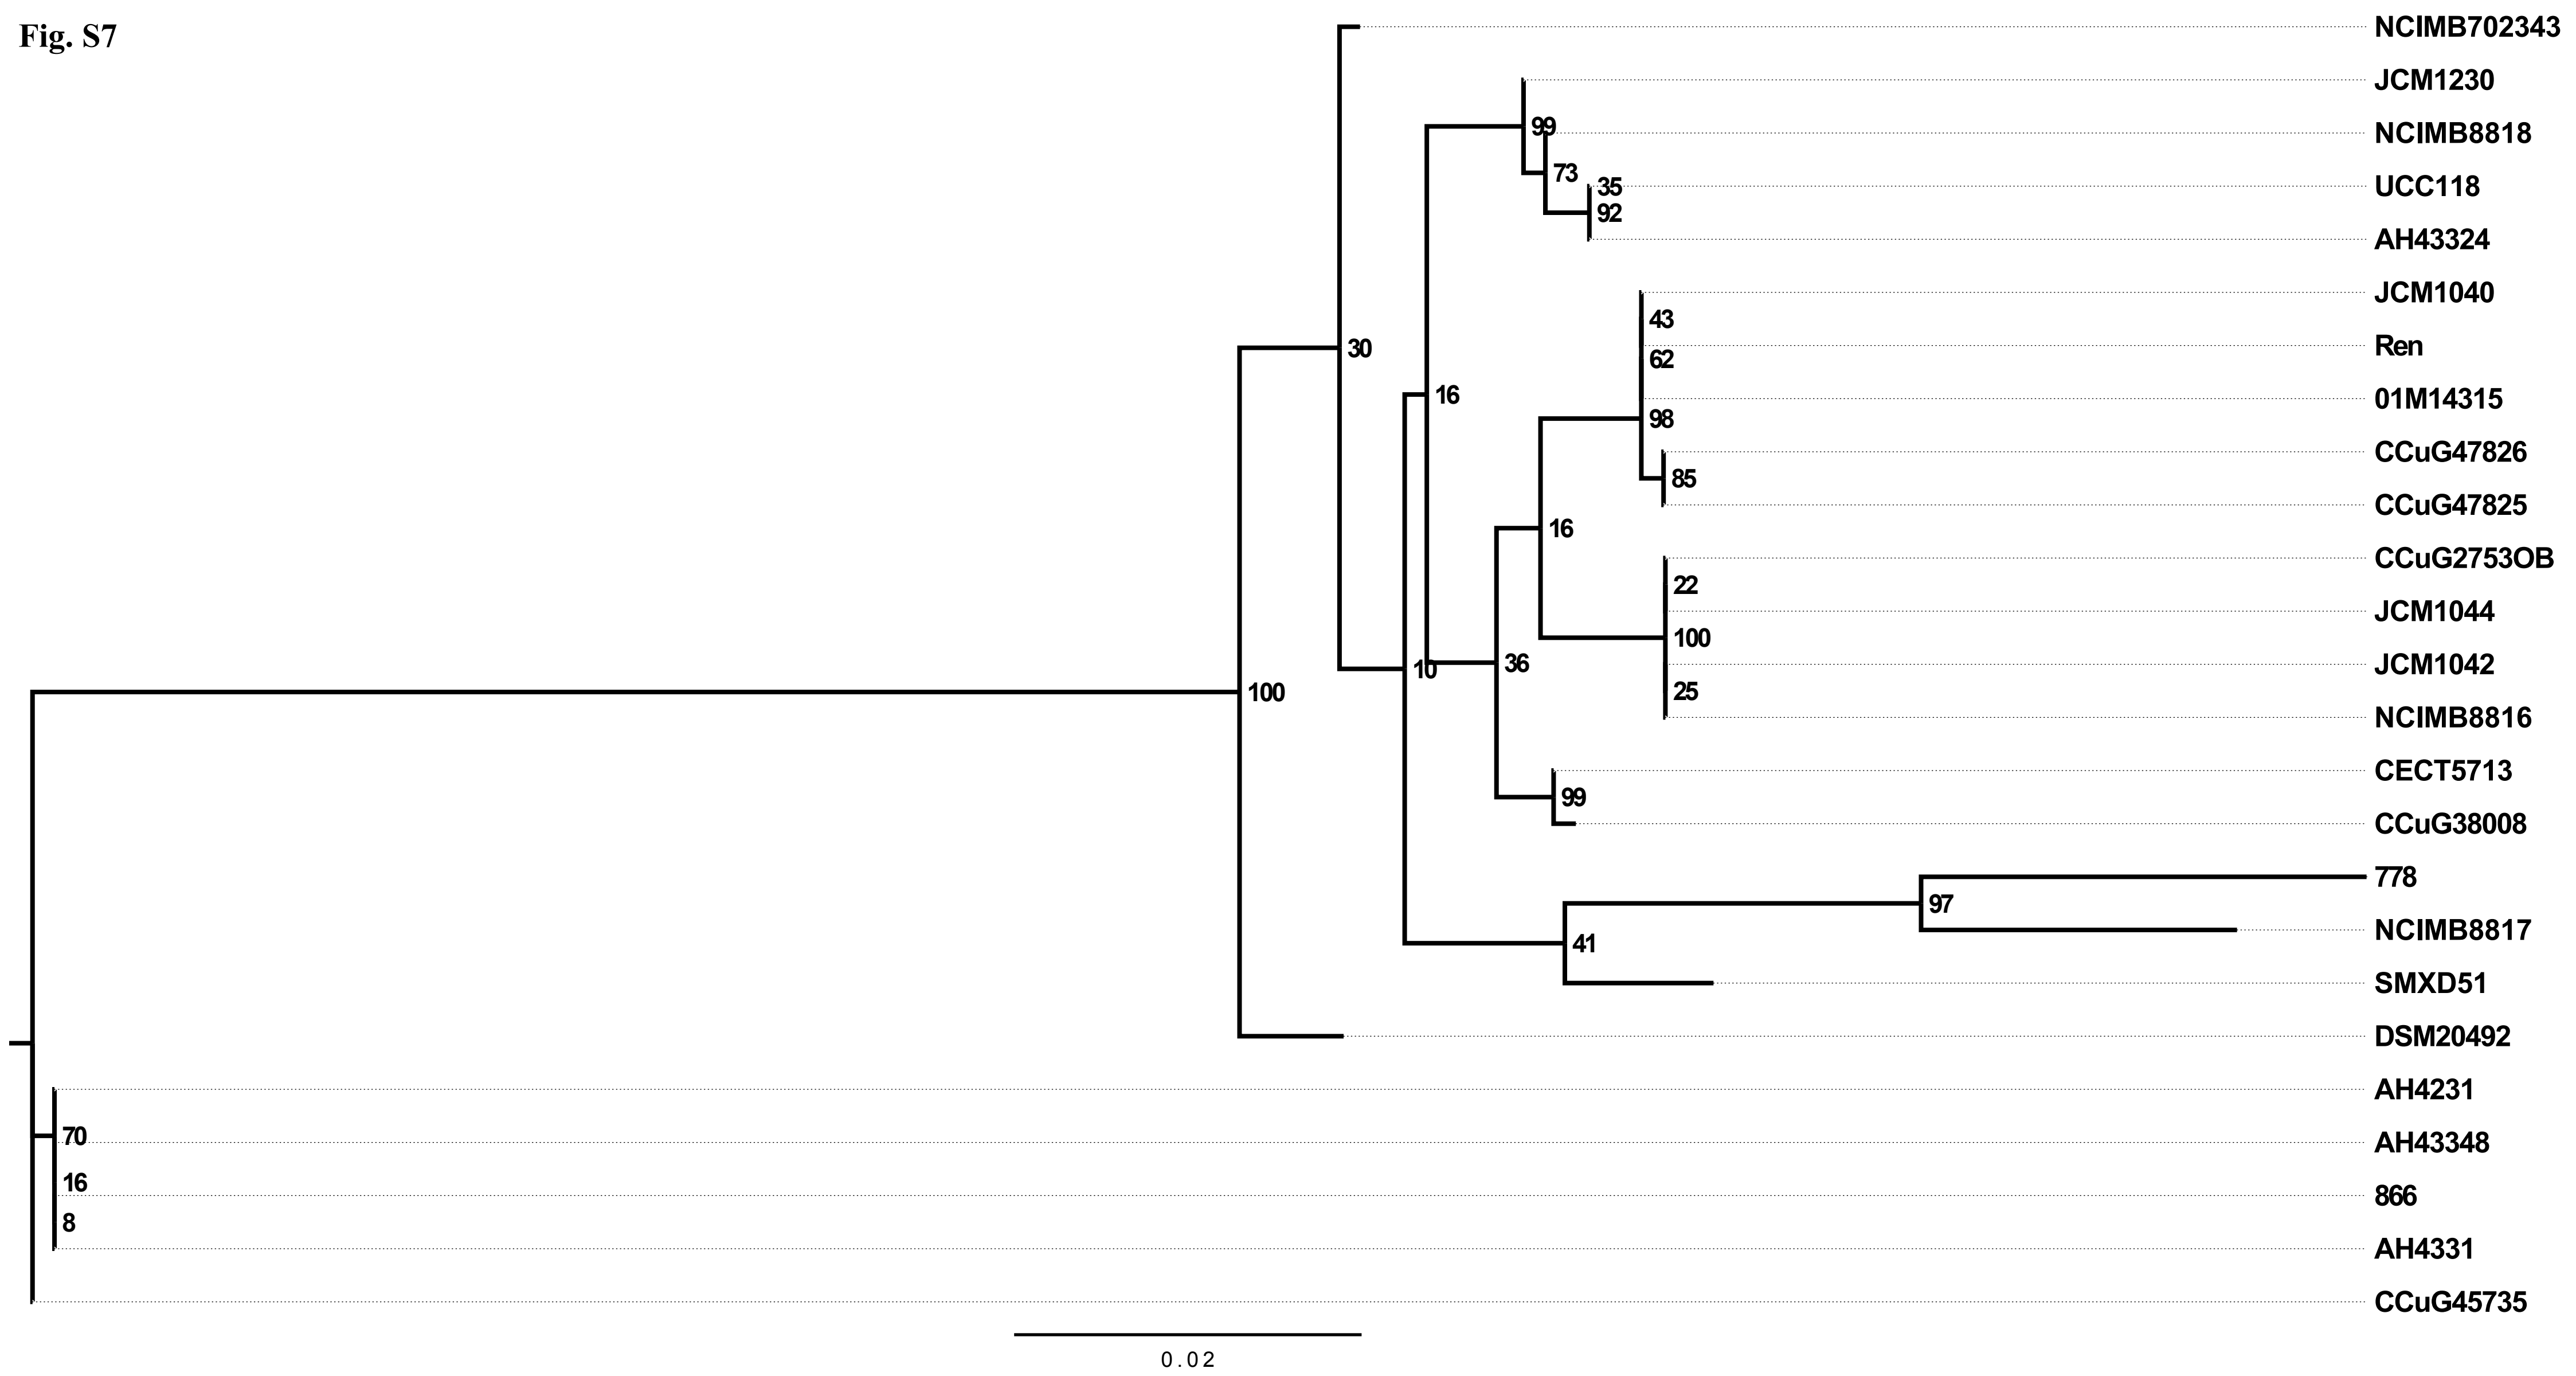

Fig. S8

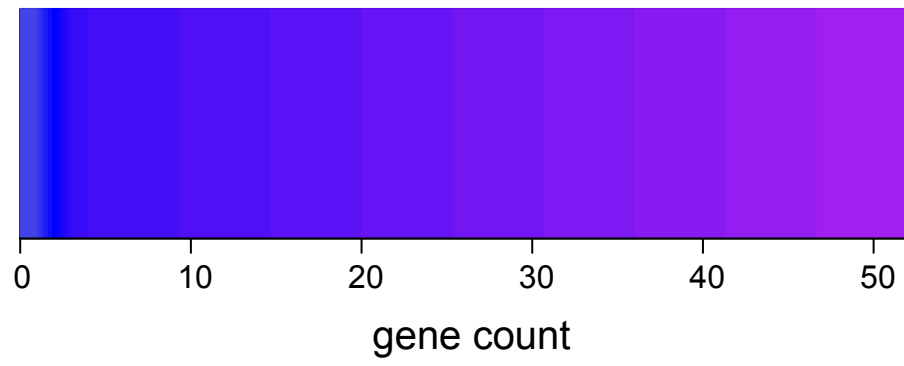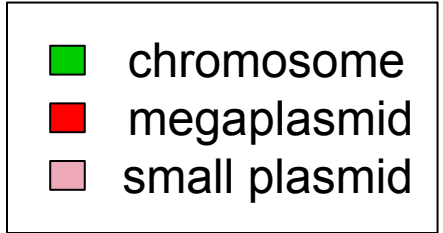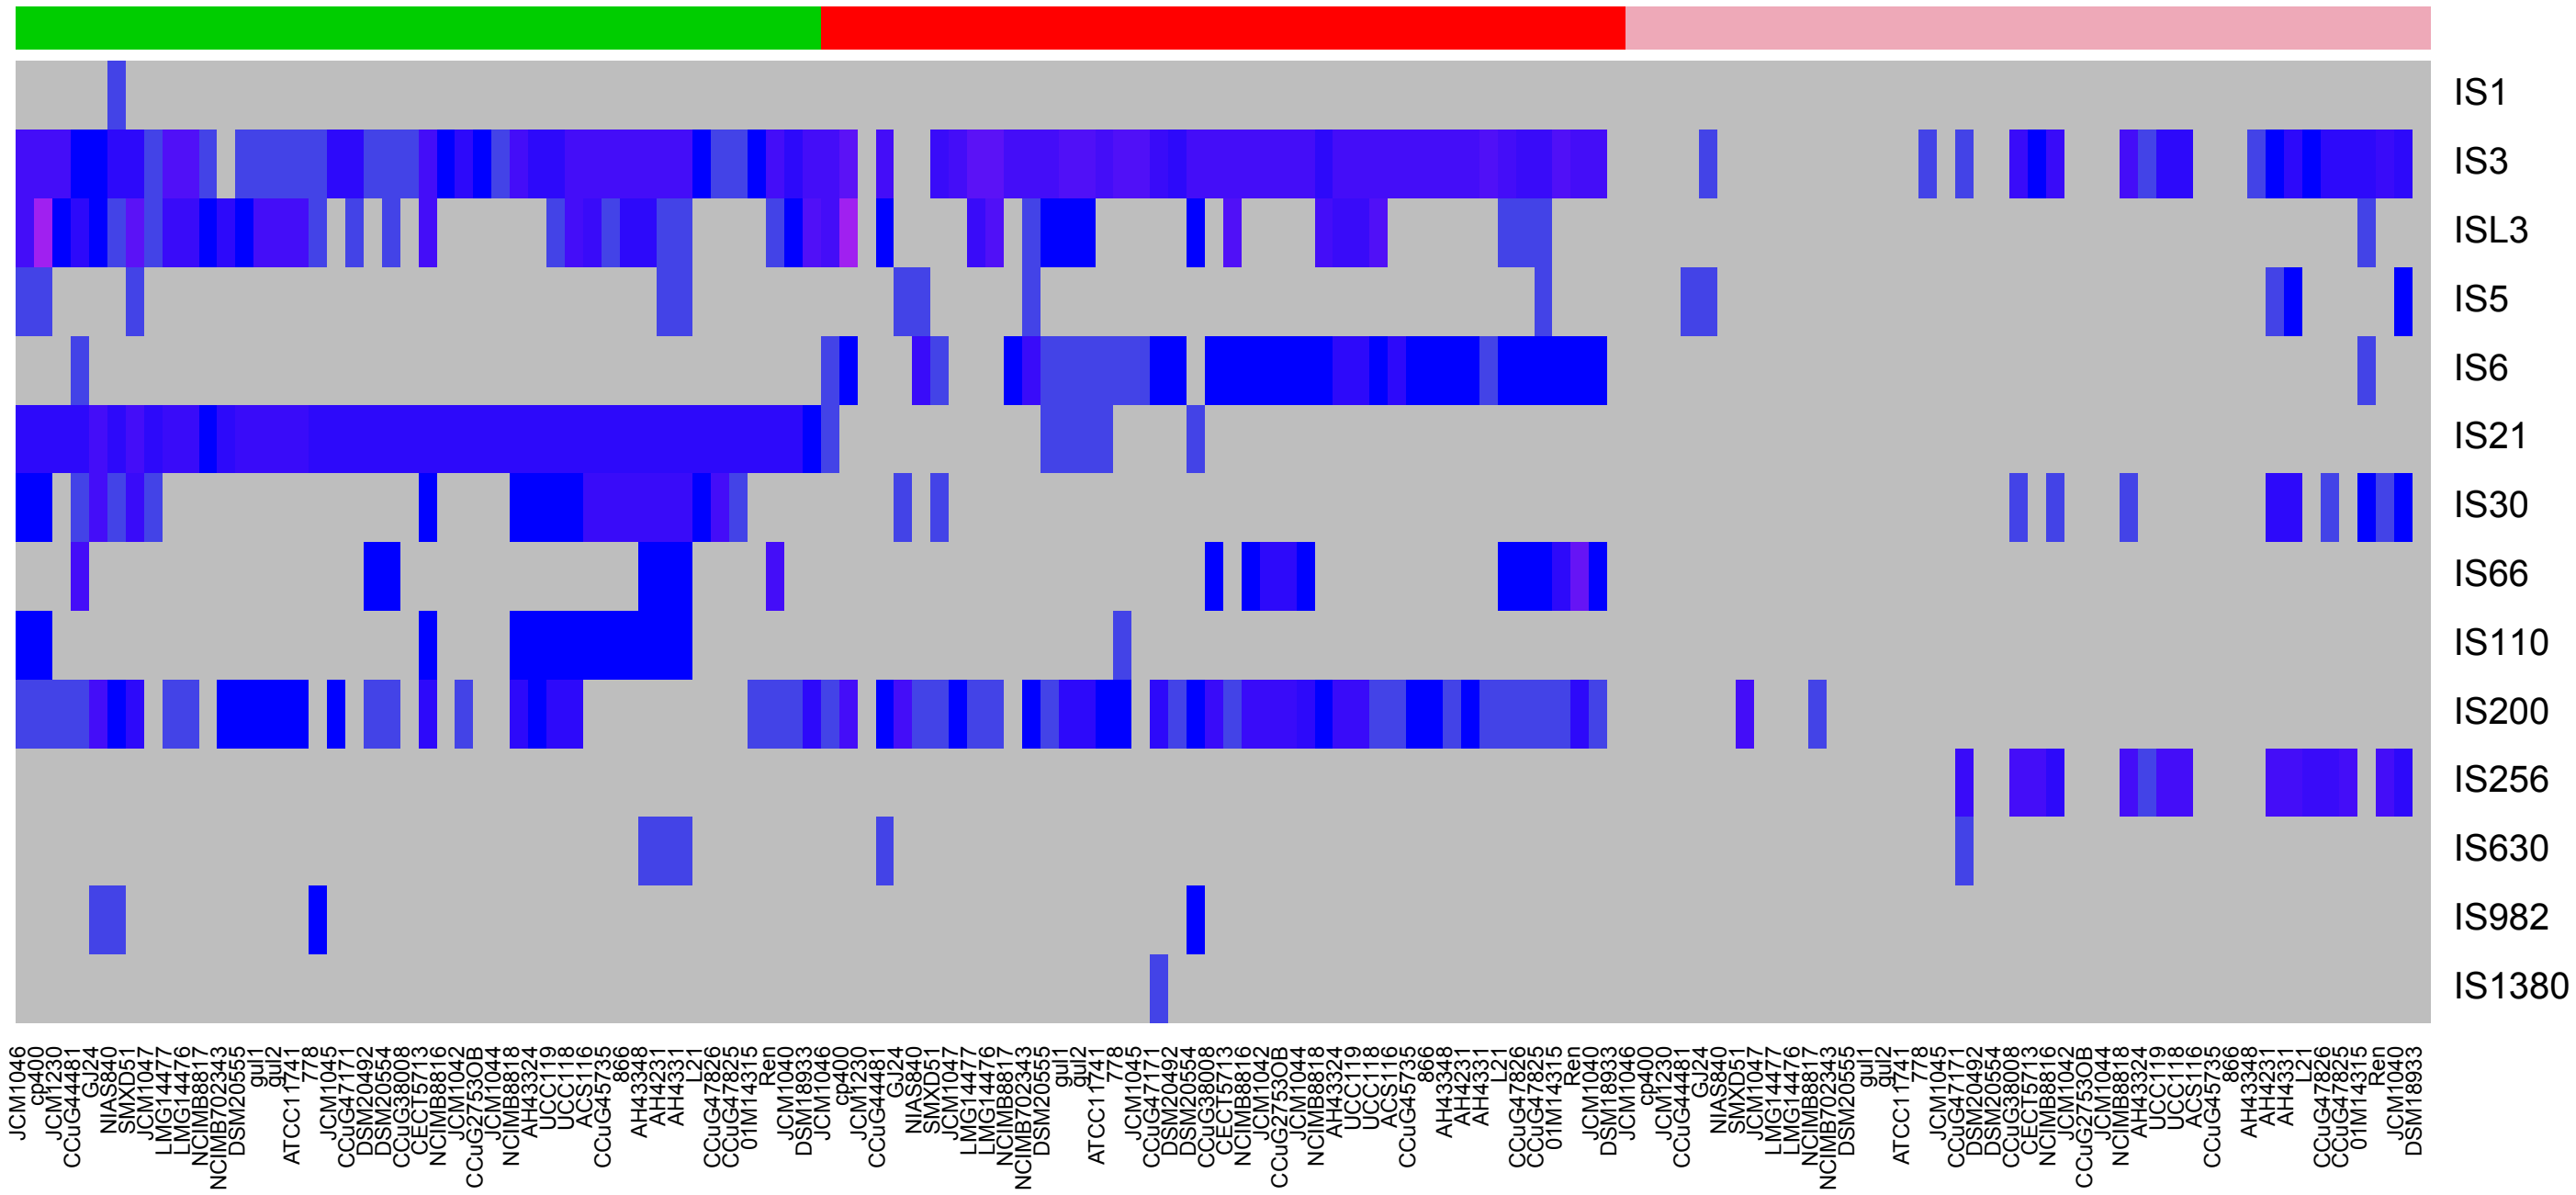

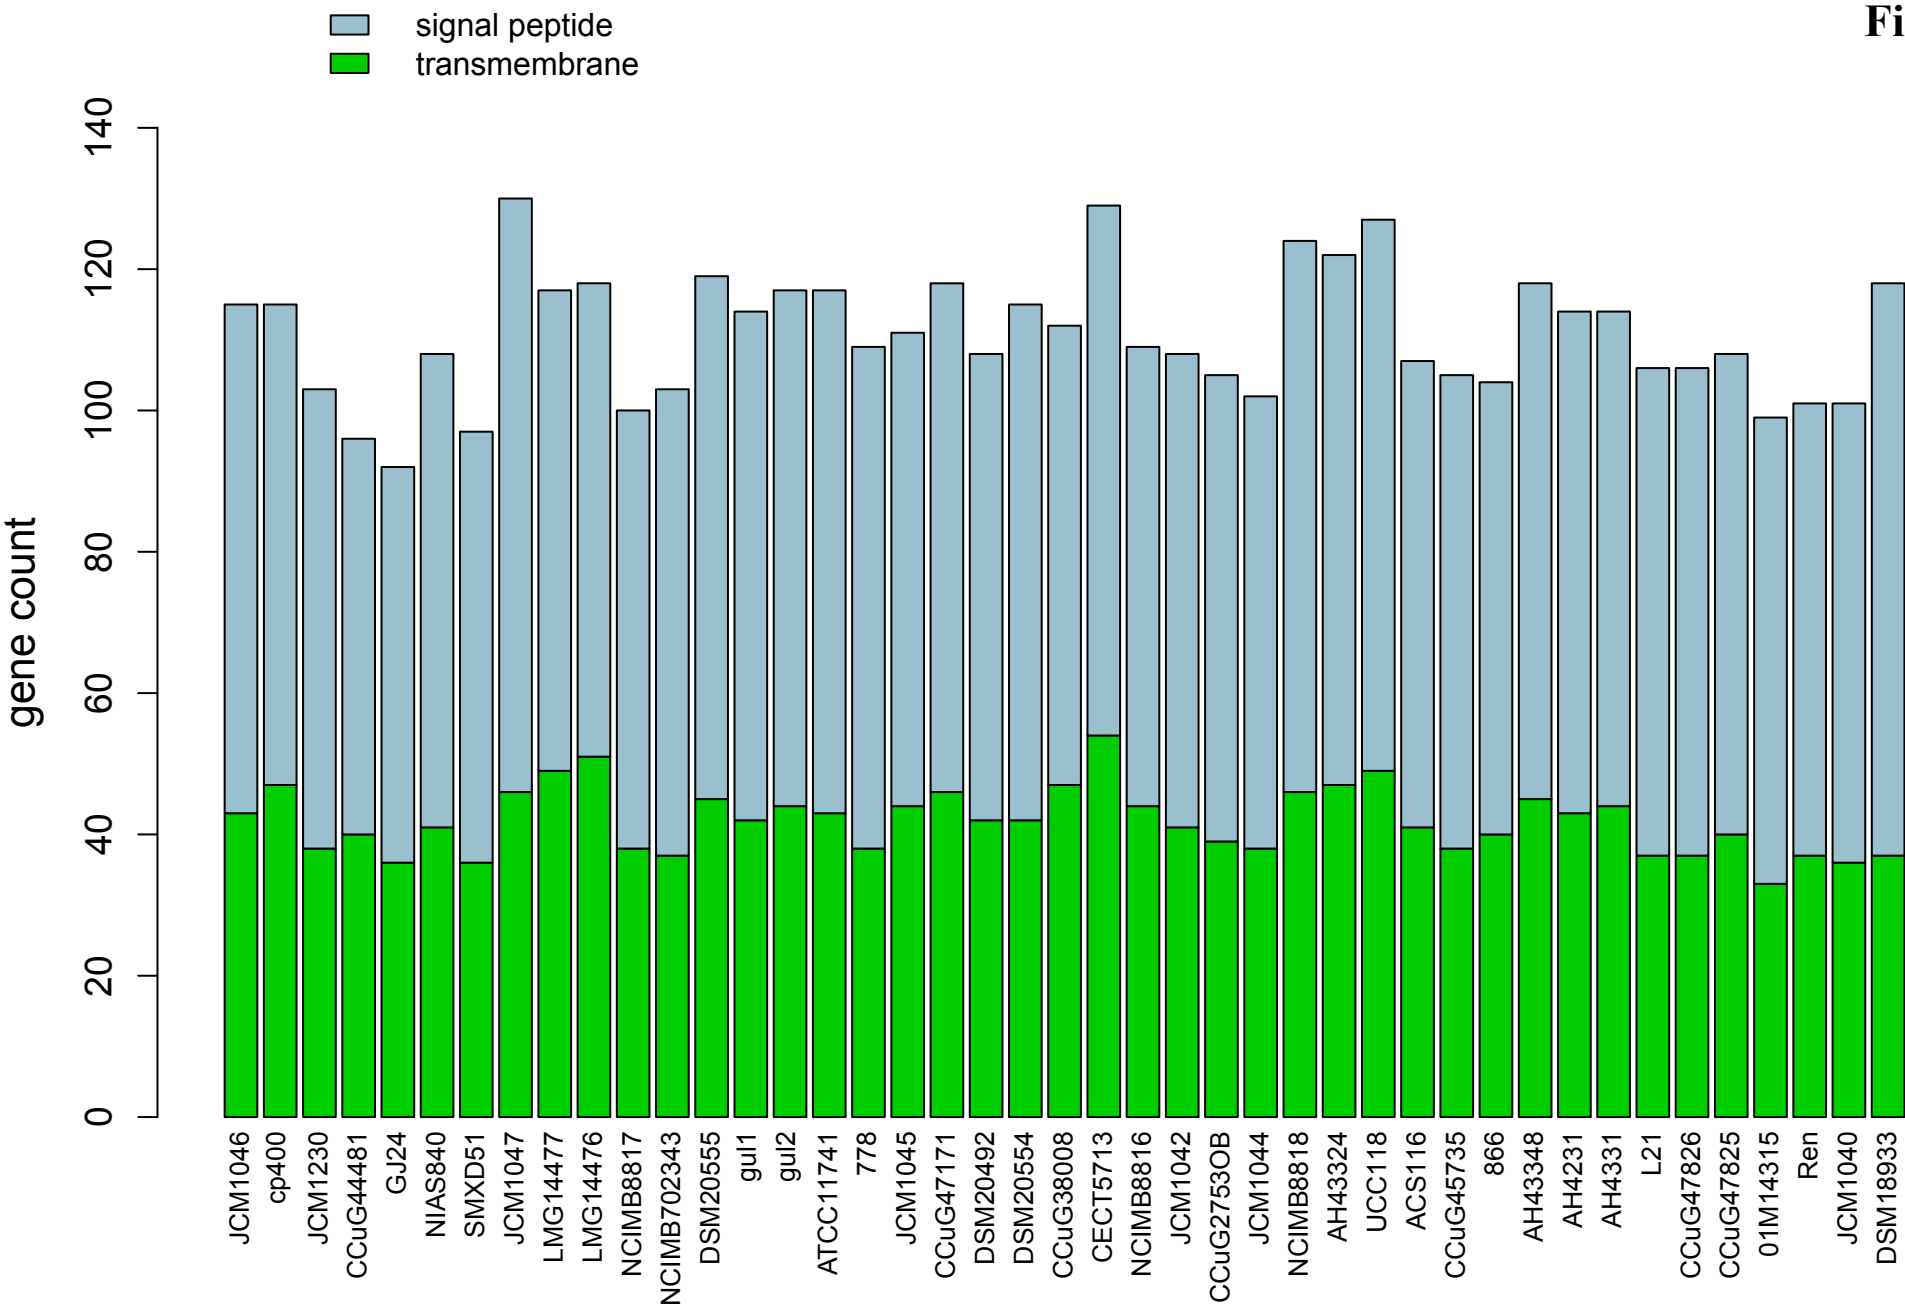



Fig. S10

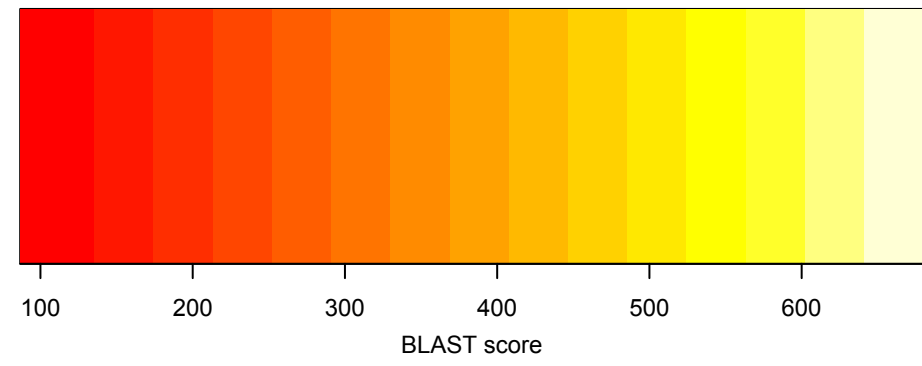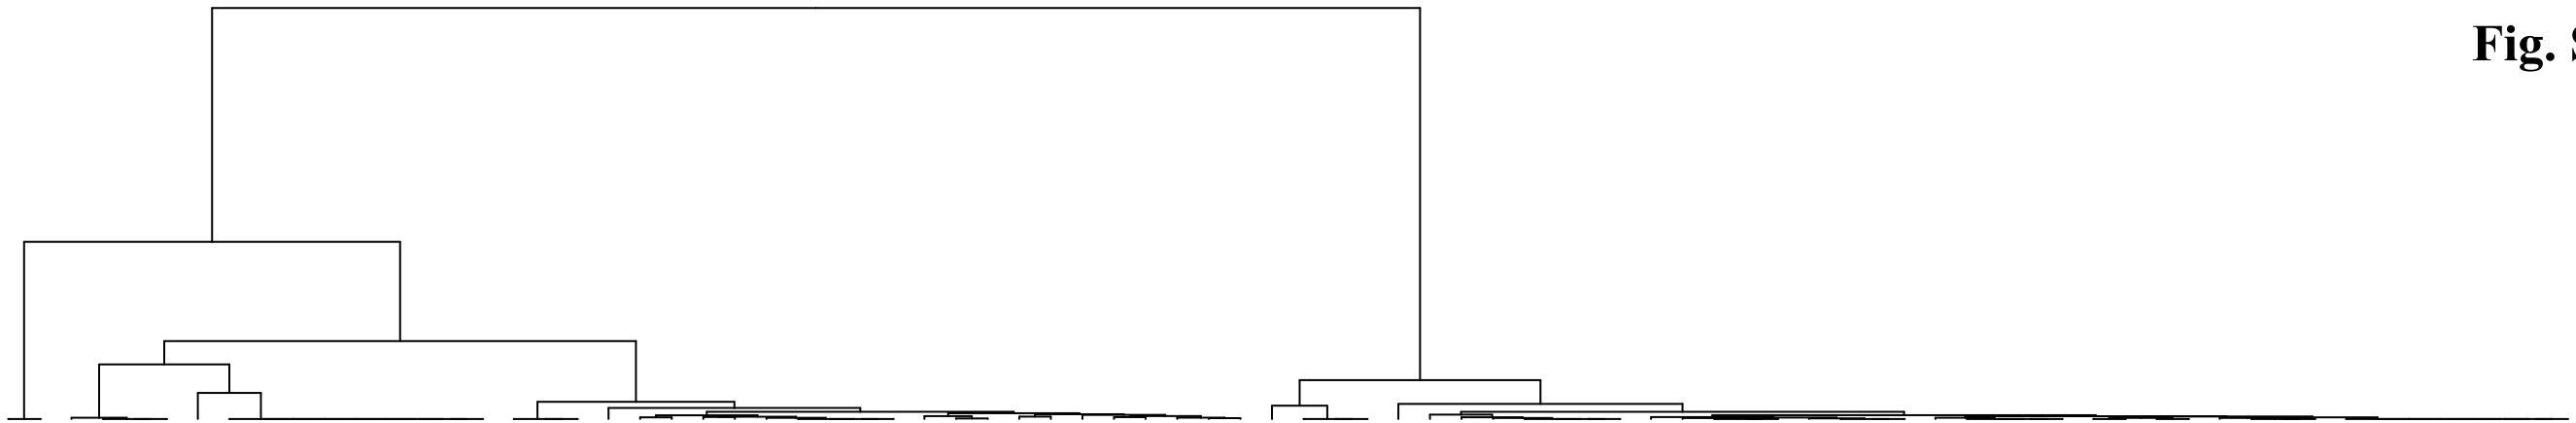

■ chromosome  
■ megaplasmid

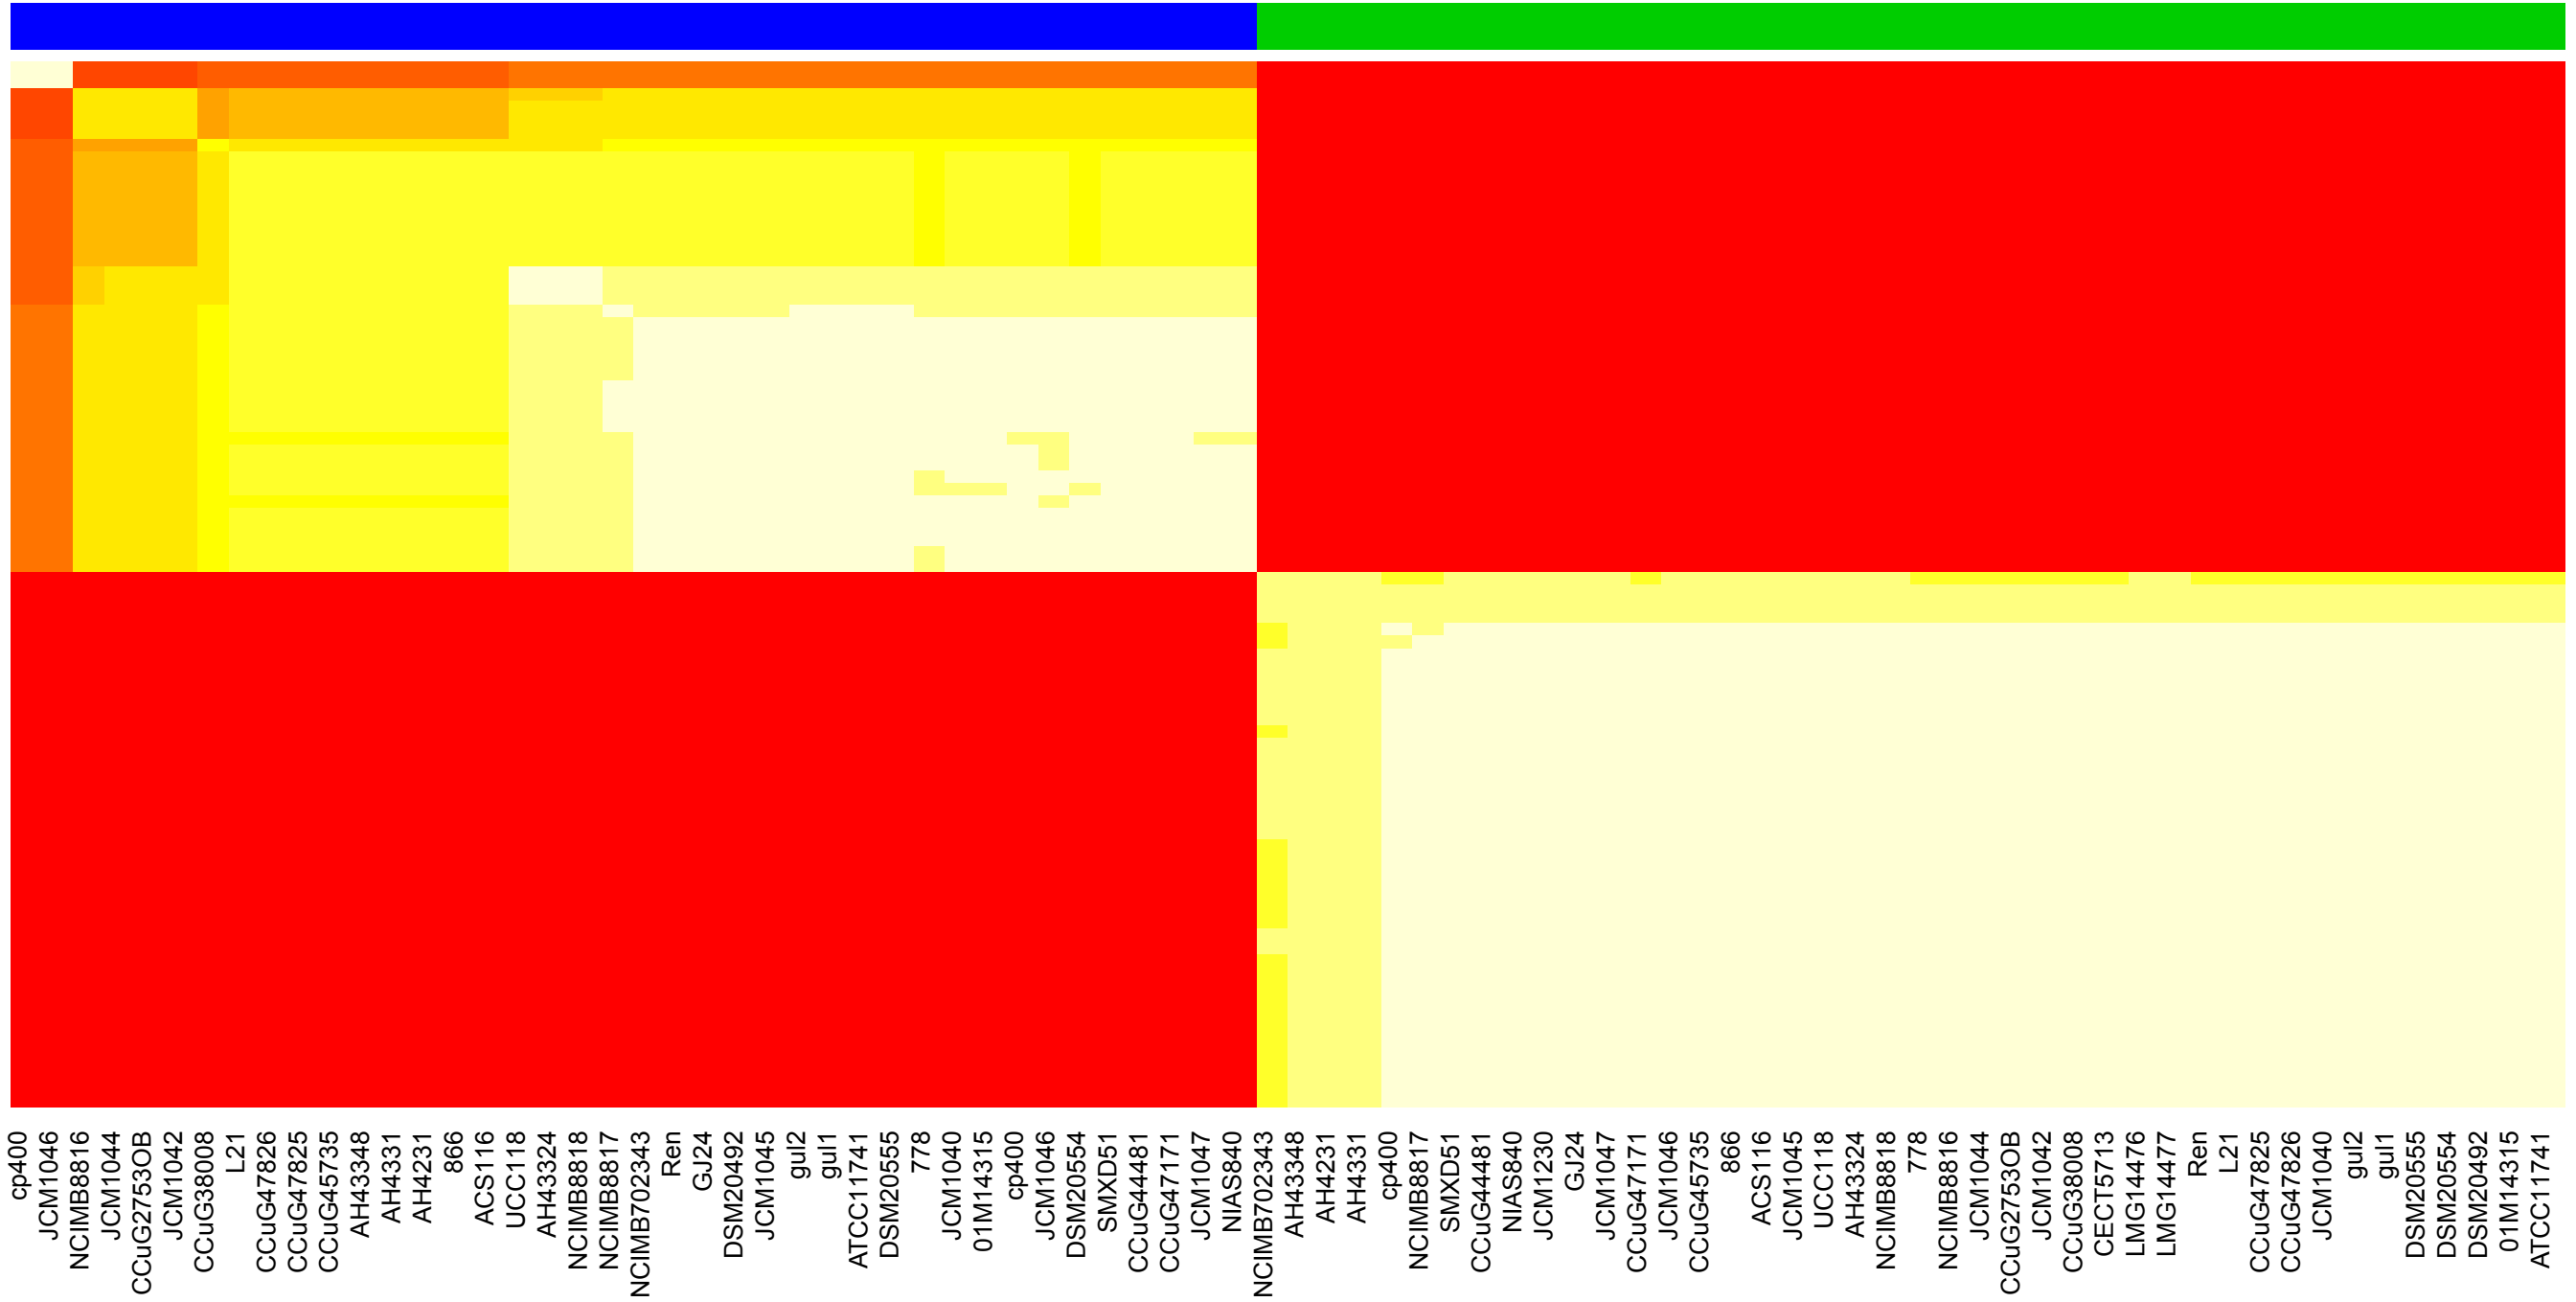

**Fig. S11**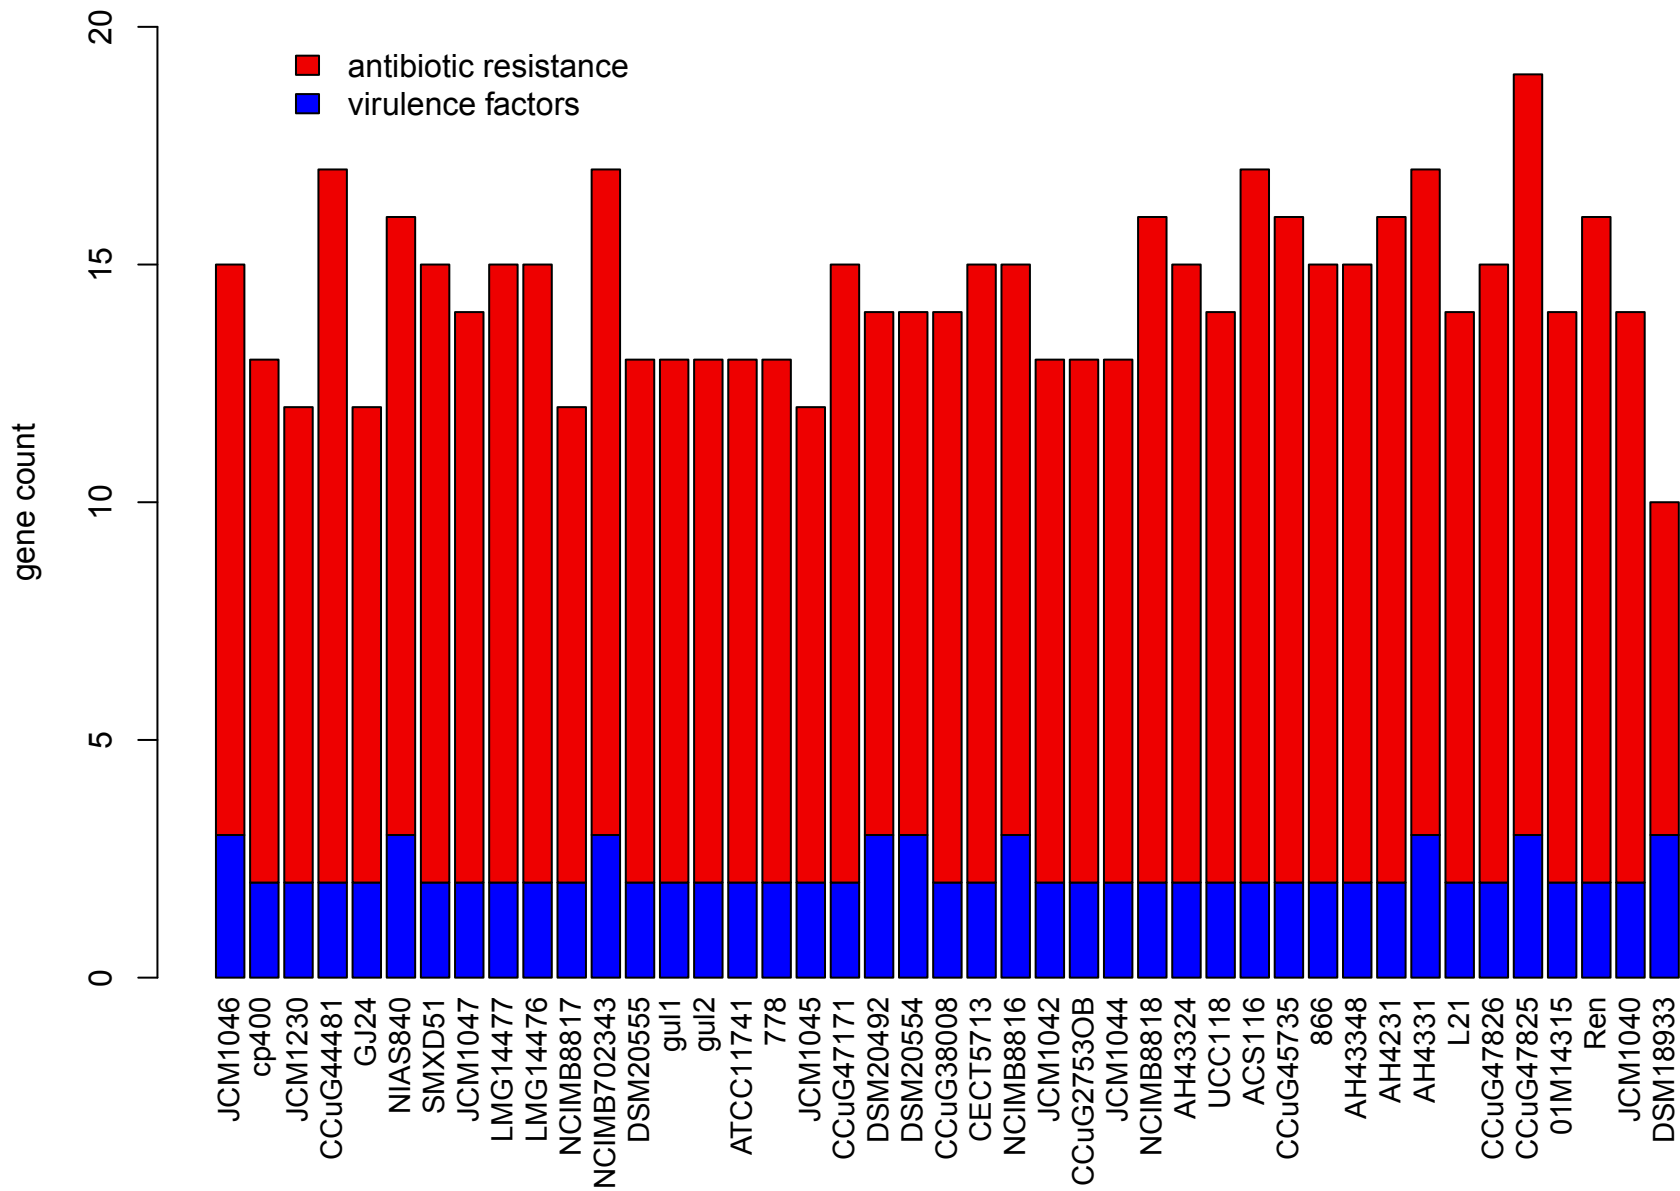

Table S1

|             | contigs | total size (bp) | max contig size (bp) | N50     | GC % | gene count | circular megaplasms | linear megaplasms | small plasmids | isolation source                | BioSample accession |
|-------------|---------|-----------------|----------------------|---------|------|------------|---------------------|-------------------|----------------|---------------------------------|---------------------|
| ACS116      | 154     | 2044600         | 71067                | 28667   | 32.7 | 2210       | 1                   | 0                 | 0              | human_vaginal_cavity            | SAMN00017035        |
| CCuG47825   | 120     | 1921003         | 93995                | 30969   | 32.8 | 2041       | 1                   | 0                 | 1              | human_blood,55-year-old_female  | SAMN06163258        |
| LMG14477    | 243     | 2080357         | 139646               | 31335   | 32.8 | 2238       | 1                   | 0                 | 1              | parakeet_with_sepsis            | SAMN06163272        |
| LMG14476    | 238     | 2087383         | 139606               | 38865   | 32.8 | 2243       | 1                   | 0                 | 1              | cat_with_myocarditis            | SAMN06163271        |
| DSM18933    | 216     | 1699788         | 420945               | 47652   | 34   | 1844       | 0                   | 0                 | 0              | faeces_of_thoroughbred_horse    | SAMD00008721        |
| cp400       | 89      | 2148103         | 152599               | 48732   | 32.8 | 2286       | 1                   | 0                 | 0              | pre-weaned_piglet_faeces        | SAMEA3138854        |
| AH4331      | 177     | 2090404         | 196933               | 51266   | 32.9 | 2254       | 1                   | 0                 | 2              | human_ileo-cecal_region         | SAMN06163250        |
| AH4231      | 186     | 2095546         | 196492               | 51450   | 32.9 | 2260       | 1                   | 0                 | 2              | human_ileo-cecal_region         | SAMN06163249        |
| AH43324     | 114     | 2176341         | 196739               | 53856   | 32.8 | 2319       | 1                   | 0                 | 1              | human_ileo-cecal_region         | SAMN06163251        |
| CCuG45735   | 77      | 1949679         | 199587               | 61326   | 32.7 | 1982       | 1                   | 0                 | 1              | human_blood                     | SAMN06163256        |
| CCuG44481   | 119     | 1946114         | 255195               | 63223   | 32.7 | 2013       | 1                   | 0                 | 1              | bird                            | SAMN06163255        |
| 866         | 82      | 1973474         | 239143               | 67307   | 32.6 | 2019       | 1                   | 0                 | 0              | clinical_isolate_ICU            | SAMN03198074        |
| AH43348     | 109     | 2026883         | 186083               | 73962   | 32.6 | 2177       | 1                   | 1                 | 1              | human_ileo-cecal_region         | SAMN06163252        |
| 01M14315    | 87      | 1933921         | 212516               | 78580   | 33   | 1965       | 1                   | 0                 | 1              | human_gallbladder_pus           | SAMN06163248        |
| DSM20555    | 63      | 1982794         | 244105               | 80533   | 32.4 | 2000       | 1                   | 0                 | 0              | human_saliva                    | SAMN02369414        |
| L21         | 74      | 1956328         | 215606               | 95624   | 32.7 | 2015       | 1                   | 0                 | 0              | human_faeces                    | SAMN06163270        |
| NCIMB8816   | 77      | 1859216         | 465152               | 106164  | 32.8 | 1886       | 1                   | 0                 | 2              | human_saliva                    | SAMN06163274        |
| JCM1044     | 59      | 1800424         | 465193               | 115042  | 32.6 | 1799       | 1                   | 0                 | 0              | human_intestine                 | SAMN06163266        |
| JCM1042     | 60      | 1802147         | 465022               | 115144  | 32.6 | 1800       | 1                   | 0                 | 0              | human_intestine                 | SAMN06163265        |
| CCuG27530B  | 48      | 1801346         | 465248               | 115144  | 32.6 | 1799       | 1                   | 0                 | 0              | human_abdomen_abcess            | SAMN06163253        |
| NCIMB702343 | 83      | 1922903         | 646361               | 119088  | 32.8 | 1953       | 1                   | 0                 | 0              | unknown                         | SAMN06163273        |
| CCuG38008   | 91      | 1936298         | 463867               | 122107  | 32.7 | 1972       | 1                   | 0                 | 2              | human_gall,73-year-old_male     | SAMN06163254        |
| gul-2       | 81      | 2002733         | 521962               | 126351  | 32.5 | 2027       | 1                   | 0                 | 0              | root_canal                      | SAMN06163263        |
| ATCC11741   | 54      | 1995868         | 274210               | 126392  | 32.5 | 2011       | 1                   | 0                 | 0              | human_HMP_ref                   | SAMN00001483        |
| JCM1040     | 66      | 1922028         | 421976               | 133271  | 32.8 | 1951       | 1                   | 0                 | 1              | human_intestine                 | SAMN06163264        |
| CCuG47171   | 140     | 2040146         | 353585               | 136925  | 32.9 | 2152       | 1                   | 0                 | 2              | human_tooth_plaque              | SAMN06163257        |
| CCuG47826   | 71      | 1980366         | 279863               | 142710  | 32.8 | 2044       | 1                   | 0                 | 0              | human_blood,55-year-old_female  | SAMN06163259        |
| JCM1230     | 82      | 1723361         | 400300               | 151438  | 32.6 | 1719       | 0                   | 0                 | 1              | chicken_intestine               | SAMN06163269        |
| JCM1045     | 69      | 1928686         | 331541               | 153948  | 32.7 | 1964       | 1                   | 0                 | 0              | human_intestine                 | SAMN06163267        |
| gul-1       | 75      | 2001390         | 521857               | 162200  | 32.5 | 2026       | 1                   | 0                 | 0              | root_canal                      | SAMN06163262        |
| 778         | 44      | 1942335         | 332399               | 164413  | 32.7 | 1947       | 1                   | 0                 | 1              | clinical_isolate_ICU            | SAMN03197988        |
| DSM20554    | 74      | 1975060         | 334317               | 170258  | 32.6 | 2026       | 1                   | 0                 | 1              | human_saliva                    | SAMN06163261        |
| JCM1047     | 147     | 2222264         | 475807               | 178703  | 32.4 | 2345       | 1                   | 1                 | 1              | swine_intestine                 | SAMN06163268        |
| NCIMB8818   | 79      | 2013336         | 250622               | 180395  | 32.9 | 2103       | 1                   | 0                 | 1              | St_lvel_cheese                  | SAMN06163276        |
| DSM20492    | 32      | 1889334         | 481851               | 240870  | 32.6 | 1892       | 1                   | 0                 | 0              | human_saliva                    | SAMN06163260        |
| NCIMB8817   | 56      | 1831814         | 777665               | 294813  | 32.6 | 1852       | 1                   | 0                 | 1              | turkey_faeces                   | SAMN06163275        |
| GJ24        | 11      | 1995968         | 754247               | 502388  | 33   | 2028       | 1                   | 0                 | 1              | human_intestine                 | SAMN02470918        |
| SMXD51      | 10      | 1967688         | 1019433              | 1019433 | 32.9 | 1992       | 1                   | 0                 | 2              | chicken_cecum                   | SAMN02470767        |
| NIAS840     | 4       | 2046557         | 1705688              | 1705688 | 33   | 2032       | 2                   | 0                 | 1              | chicken_faeces                  | SAMN02470897        |
| Ren         | 3       | 1978364         | 1751565              | 1751565 | 33   | 2019       | 1                   | 0                 | 1              | human_centanarian_faeces        | SAMN02584770        |
| UCC118      | 4       | 2133977         | 1827111              | 1827111 | 33   | 2264       | 1                   | 0                 | 2              | human_ileo-cecal_region         | SAMN02604111        |
| CECT5713    | 4       | 2136138         | 1828169              | 1828169 | 33.1 | 2345       | 1                   | 0                 | 2              | human_breast_milk/infant_faeces | SAMN02604101        |
| JCM1046     | 5       | 2320461         | 1836297              | 1836297 | 32.9 | 2296       | 2                   | 1                 | 1              | swine_intestine                 | SAMN02711722        |

Table S2

| strain     | gene         | contig     | replicon | % identity | alignment length | e-value   | BLAST score | gene length |
|------------|--------------|------------|----------|------------|------------------|-----------|-------------|-------------|
| 778        | repA_LSL1739 | NODE_46    | MP       | 99.21      | 254              | 8.00E-165 | 507         | 254         |
| 778        | repE_LSL1740 | NODE_46    | MP       | 99.09      | 330              | 0         | 666         | 330         |
| 778        | parA_LSL1741 | NODE_46    | MP       | 99.63      | 270              | 2.00E-179 | 550         | 270         |
| 866        | repA_LSL1739 | NODE_77    | MP       | 99.21      | 254              | 8.00E-165 | 507         | 254         |
| 866        | repE_LSL1740 | NODE_77    | MP       | 96.06      | 330              | 0         | 644         | 330         |
| 866        | parA_LSL1741 | NODE_77    | MP       | 99.63      | 270              | 2.00E-179 | 550         | 270         |
| 01M14315   | repA_LSL1739 | contig_34  | MP       | 99.21      | 254              | 7.00E-165 | 507         | 254         |
| 01M14315   | repE_LSL1740 | contig_34  | MP       | 99.09      | 330              | 0         | 665         | 330         |
| 01M14315   | parA_LSL1741 | contig_34  | MP       | 99.63      | 270              | 1.00E-179 | 550         | 270         |
| ACS116     | repA_LSL1739 | contig_13  | MP       | 98.82      | 254              | 1.00E-166 | 505         | 254         |
| ACS116     | repE_LSL1740 | contig_13  | MP       | 99.09      | 330              | 0         | 667         | 330         |
| ACS116     | parA_LSL1741 | contig_139 | MP       | 99.16      | 239              | 1.00E-169 | 484         | 270         |
| AH4231     | repA_LSL1739 | contig_95  | MP       | 99.21      | 254              | 8.00E-165 | 507         | 254         |
| AH4231     | repE_LSL1740 | contig_95  | MP       | 98.79      | 330              | 0         | 664         | 330         |
| AH4231     | parA_LSL1741 | contig_95  | MP       | 99.63      | 270              | 2.00E-179 | 550         | 270         |
| AH4331     | repA_LSL1739 | contig_101 | MP       | 99.21      | 254              | 8.00E-165 | 507         | 254         |
| AH4331     | repE_LSL1740 | contig_101 | MP       | 98.79      | 330              | 0         | 664         | 330         |
| AH4331     | parA_LSL1741 | contig_101 | MP       | 99.63      | 270              | 2.00E-179 | 550         | 270         |
| AH43324    | repA_LSL1739 | contig_44  | MP       | 99.61      | 254              | 5.00E-166 | 510         | 254         |
| AH43324    | repE_LSL1740 | contig_44  | MP       | 95.45      | 330              | 0         | 644         | 330         |
| AH43324    | parA_LSL1741 | contig_44  | MP       | 100        | 270              | 3.00E-180 | 551         | 270         |
| AH43348    | repA_LSL1739 | contig_70  | MP       | 99.21      | 254              | 9.00E-165 | 507         | 254         |
| AH43348    | repE_LSL1740 | contig_70  | MP       | 98.79      | 330              | 0         | 664         | 330         |
| AH43348    | parA_LSL1741 | contig_70  | MP       | 99.63      | 270              | 2.00E-179 | 550         | 270         |
| AH43348    | parA_LSL1741 | contig_69  | MPL      | 93.7       | 270              | 3.00E-169 | 520         | 270         |
| ATCC11741  | repA_LSL1739 | contig_37  | MP       | 99.21      | 254              | 9.00E-165 | 506         | 254         |
| ATCC11741  | repE_LSL1740 | contig_37  | MP       | 96.06      | 330              | 0         | 644         | 330         |
| ATCC11741  | parA_LSL1741 | contig_37  | MP       | 99.63      | 270              | 1.00E-179 | 550         | 270         |
| CCuG2753OB | repA_LSL1739 | contig_21  | MP       | 99.21      | 254              | 7.00E-165 | 507         | 254         |
| CCuG2753OB | repE_LSL1740 | contig_21  | MP       | 98.79      | 330              | 0         | 663         | 330         |
| CCuG2753OB | parA_LSL1741 | contig_21  | MP       | 98.89      | 270              | 3.00E-178 | 546         | 270         |
| CCuG38008  | repA_LSL1739 | contig_40  | MP       | 99.21      | 254              | 5.00E-165 | 507         | 254         |
| CCuG38008  | repE_LSL1740 | contig_40  | MP       | 97.27      | 330              | 0         | 659         | 330         |
| CCuG38008  | parA_LSL1741 | contig_40  | MP       | 99.63      | 270              | 1.00E-179 | 550         | 270         |
| CCuG44481  | repA_LSL1739 | contig_46  | MP       | 99.21      | 254              | 7.00E-165 | 507         | 254         |
| CCuG44481  | repE_LSL1740 | contig_46  | MP       | 96.36      | 330              | 0         | 646         | 330         |
| CCuG44481  | parA_LSL1741 | contig_39  | MP       | 99.63      | 270              | 0         | 550         | 270         |
| CCuG45735  | repA_LSL1739 | contig_51  | MP       | 99.21      | 254              | 8.00E-165 | 507         | 254         |
| CCuG45735  | repE_LSL1740 | contig_51  | MP       | 99.39      | 330              | 0         | 668         | 330         |
| CCuG45735  | parA_LSL1741 | contig_51  | MP       | 99.63      | 270              | 2.00E-179 | 550         | 270         |
| CCuG47171  | repA_LSL1739 | contig_58  | MP       | 98.43      | 254              | 3.00E-163 | 503         | 254         |
| CCuG47171  | repE_LSL1740 | contig_58  | MP       | 96.97      | 330              | 0         | 650         | 330         |
| CCuG47171  | parA_LSL1741 | contig_58  | MP       | 100        | 270              | 4.00E-180 | 551         | 270         |
| CCuG47825  | repA_LSL1739 | contig_92  | MP       | 99.21      | 254              | 7.00E-165 | 507         | 254         |
| CCuG47825  | repE_LSL1740 | contig_92  | MP       | 99.39      | 330              | 0         | 668         | 330         |
| CCuG47825  | parA_LSL1741 | contig_91  | MP       | 99.63      | 270              | 0         | 550         | 270         |
| CCuG47826  | repA_LSL1739 | contig_36  | MP       | 99.21      | 254              | 8.00E-165 | 507         | 254         |
| CCuG47826  | repE_LSL1740 | contig_36  | MP       | 99.39      | 330              | 0         | 668         | 330         |
| CCuG47826  | parA_LSL1741 | contig_36  | MP       | 99.63      | 270              | 2.00E-179 | 550         | 270         |
| CECT5713   | repA_LSL1739 | contig_4   | MP       | 99.21      | 254              | 9.00E-165 | 507         | 254         |
| CECT5713   | repE_LSL1740 | contig_4   | MP       | 97.27      | 330              | 0         | 659         | 330         |
| CECT5713   | parA_LSL1741 | contig_4   | MP       | 99.63      | 270              | 2.00E-179 | 550         | 270         |
| cp400      | repA_LSL1739 | contig_16  | MP       | 99.21      | 254              | 7.00E-165 | 507         | 254         |
| cp400      | repE_LSL1740 | contig_16  | MP       | 96.36      | 330              | 0         | 646         | 330         |
| cp400      | parA_LSL1741 | contig_16  | MP       | 99.63      | 270              | 2.00E-179 | 550         | 270         |
| DSM18933   | repA_LSL1739 | NODE_63    | C        | 78.74      | 254              | 3.00E-132 | 413         | 254         |
| DSM18933   | parA_LSL1741 | NODE_63    | C        | 86.62      | 269              | 8.00E-157 | 484         | 270         |
| DSM20492   | repA_LSL1739 | contig_14  | MP       | 98.82      | 254              | 3.00E-164 | 505         | 254         |
| DSM20492   | repE_LSL1740 | contig_14  | MP       | 95.76      | 330              | 0         | 644         | 330         |
| DSM20492   | parA_LSL1741 | contig_14  | MP       | 99.63      | 270              | 2.00E-179 | 550         | 270         |

|             |              |            |    |       |     |           |     |     |
|-------------|--------------|------------|----|-------|-----|-----------|-----|-----|
| DSM20554    | repA_LSL1739 | contig_26  | MP | 99.21 | 254 | 8.00E-165 | 507 | 254 |
| DSM20554    | repE_LSL1740 | contig_26  | MP | 92.73 | 330 | 0         | 626 | 330 |
| DSM20554    | parA_LSL1741 | contig_26  | MP | 99.26 | 270 | 1.00E-178 | 547 | 270 |
| DSM20555    | repA_LSL1739 | Scaffold29 | MP | 99.21 | 254 | 6.00E-165 | 506 | 254 |
| DSM20555    | repE_LSL1740 | Scaffold29 | MP | 96.06 | 330 | 0         | 644 | 330 |
| DSM20555    | parA_LSL1741 | Scaffold33 | MP | 99.63 | 270 | 3.00E-180 | 550 | 270 |
| GJ24        | repA_LSL1739 | contig_9   | MP | 99.61 | 254 | 2.00E-165 | 509 | 254 |
| GJ24        | repE_LSL1740 | contig_9   | MP | 95.15 | 330 | 0         | 641 | 330 |
| GJ24        | parA_LSL1741 | contig_9   | MP | 99.63 | 270 | 2.00E-179 | 550 | 270 |
| gul1        | repA_LSL1739 | contig_17  | MP | 99.21 | 254 | 9.00E-165 | 506 | 254 |
| gul1        | repE_LSL1740 | contig_17  | MP | 96.06 | 330 | 0         | 644 | 330 |
| gul1        | parA_LSL1741 | contig_17  | MP | 99.63 | 270 | 1.00E-179 | 550 | 270 |
| gul2        | repA_LSL1739 | contig_18  | MP | 99.21 | 254 | 9.00E-165 | 506 | 254 |
| gul2        | repE_LSL1740 | contig_18  | MP | 96.06 | 330 | 0         | 644 | 330 |
| gul2        | parA_LSL1741 | contig_18  | MP | 99.63 | 270 | 1.00E-179 | 550 | 270 |
| JCM1040     | repA_LSL1739 | contig_30  | MP | 99.21 | 254 | 7.00E-165 | 507 | 254 |
| JCM1040     | repE_LSL1740 | contig_30  | MP | 99.7  | 330 | 0         | 671 | 330 |
| JCM1040     | parA_LSL1741 | contig_30  | MP | 99.26 | 270 | 7.00E-179 | 548 | 270 |
| JCM1042     | repA_LSL1739 | contig_27  | MP | 99.21 | 254 | 7.00E-165 | 507 | 254 |
| JCM1042     | repE_LSL1740 | contig_27  | MP | 98.79 | 330 | 0         | 663 | 330 |
| JCM1042     | parA_LSL1741 | contig_27  | MP | 98.89 | 270 | 3.00E-178 | 546 | 270 |
| JCM1044     | repA_LSL1739 | contig_23  | MP | 99.21 | 254 | 7.00E-165 | 507 | 254 |
| JCM1044     | repE_LSL1740 | contig_23  | MP | 98.79 | 330 | 0         | 663 | 330 |
| JCM1044     | parA_LSL1741 | contig_23  | MP | 98.89 | 270 | 3.00E-178 | 546 | 270 |
| JCM1045     | repA_LSL1739 | contig_30  | MP | 99.21 | 254 | 8.00E-165 | 507 | 254 |
| JCM1045     | repE_LSL1740 | contig_30  | MP | 99.39 | 330 | 0         | 668 | 330 |
| JCM1045     | parA_LSL1741 | contig_30  | MP | 99.63 | 270 | 2.00E-179 | 550 | 270 |
| JCM1046     | repA_LSL1739 | contig_65  | MP | 99.21 | 254 | 8.00E-166 | 507 | 254 |
| JCM1046     | repE_LSL1740 | contig_65  | MP | 96.67 | 330 | 0         | 648 | 330 |
| JCM1046     | parA_LSL1741 | contig_65  | MP | 99.63 | 270 | 0         | 550 | 270 |
| JCM1047     | repA_LSL1739 | contig_34  | MP | 98.43 | 254 | 3.00E-163 | 503 | 254 |
| JCM1047     | repE_LSL1740 | contig_34  | MP | 95.45 | 330 | 0         | 642 | 330 |
| JCM1047     | parA_LSL1741 | contig_34  | MP | 99.63 | 270 | 2.00E-179 | 550 | 270 |
| L21         | repA_LSL1739 | contig_44  | MP | 99.21 | 254 | 8.00E-165 | 507 | 254 |
| L21         | repE_LSL1740 | contig_44  | MP | 99.39 | 330 | 0         | 668 | 330 |
| L21         | parA_LSL1741 | contig_44  | MP | 99.63 | 270 | 2.00E-179 | 550 | 270 |
| LMG14476    | repA_LSL1739 | contig_42  | MP | 98.82 | 254 | 3.00E-164 | 505 | 254 |
| LMG14476    | repE_LSL1740 | contig_42  | MP | 95.15 | 330 | 0         | 640 | 330 |
| LMG14476    | parA_LSL1741 | contig_42  | MP | 99.63 | 270 | 2.00E-179 | 550 | 270 |
| LMG14477    | repA_LSL1739 | contig_41  | MP | 98.82 | 254 | 3.00E-164 | 505 | 254 |
| LMG14477    | repE_LSL1740 | contig_41  | MP | 95.15 | 330 | 0         | 640 | 330 |
| LMG14477    | parA_LSL1741 | contig_41  | MP | 99.63 | 270 | 2.00E-179 | 550 | 270 |
| NCIMB702343 | repA_LSL1739 | NODE_62    | MP | 99.61 | 254 | 2.00E-165 | 509 | 254 |
| NCIMB702343 | repE_LSL1740 | NODE_62    | MP | 95.45 | 330 | 0         | 644 | 330 |
| NCIMB702343 | parA_LSL1741 | NODE_62    | MP | 99.63 | 270 | 2.00E-179 | 550 | 270 |
| NCIMB8816   | repA_LSL1739 | contig_35  | MP | 99.21 | 254 | 7.00E-165 | 507 | 254 |
| NCIMB8816   | repE_LSL1740 | contig_35  | MP | 98.79 | 330 | 0         | 663 | 330 |
| NCIMB8816   | parA_LSL1741 | contig_35  | MP | 98.89 | 270 | 3.00E-178 | 546 | 270 |
| NCIMB8817   | repA_LSL1739 | contig_19  | MP | 99.21 | 254 | 7.00E-165 | 507 | 254 |
| NCIMB8817   | repE_LSL1740 | contig_19  | MP | 96.36 | 330 | 0         | 645 | 330 |
| NCIMB8817   | parA_LSL1741 | contig_19  | MP | 99.63 | 270 | 2.00E-179 | 550 | 270 |
| NCIMB8818   | repA_LSL1739 | contig_33  | MP | 99.21 | 254 | 8.00E-165 | 507 | 254 |
| NCIMB8818   | repE_LSL1740 | contig_33  | MP | 99.39 | 330 | 0         | 668 | 330 |
| NCIMB8818   | parA_LSL1741 | contig_33  | MP | 99.63 | 270 | 2.00E-179 | 550 | 270 |
| NIAS840     | repA_LSL1739 | contig_3   | MP | 98.43 | 254 | 3.00E-163 | 503 | 254 |
| NIAS840     | repE_LSL1740 | contig_3   | MP | 95.45 | 330 | 0         | 642 | 330 |
| NIAS840     | parA_LSL1741 | contig_3   | MP | 100   | 270 | 4.00E-180 | 551 | 270 |
| Ren         | repA_LSL1739 | plasmid_1  | MP | 99.21 | 254 | 8.00E-165 | 507 | 254 |
| Ren         | repE_LSL1740 | plasmid_1  | MP | 99.09 | 330 | 0         | 665 | 330 |
| Ren         | parA_LSL1741 | plasmid_1  | MP | 99.63 | 270 | 2.00E-179 | 550 | 270 |
| SMXD51      | repA_LSL1739 | contig_7   | MP | 99.44 | 179 | 8.00E-140 | 357 | 254 |



|        |              |          |    |       |     |           |     |     |
|--------|--------------|----------|----|-------|-----|-----------|-----|-----|
| SMXD51 | repE_LSL1740 | contig_7 | MP | 96.36 | 330 | 0         | 646 | 330 |
| SMXD51 | parA_LSL1741 | contig_7 | MP | 99.63 | 270 | 2.00E-179 | 550 | 270 |
| UCC118 | repA_LSL1739 | contig_4 | MP | 100   | 254 | 2.00E-166 | 511 | 254 |
| UCC118 | repE_LSL1740 | contig_4 | MP | 95.45 | 330 | 0         | 644 | 330 |
| UCC118 | parA_LSL1741 | contig_4 | MP | 100   | 270 | 5.00E-180 | 551 | 270 |

**Table S3**

| strain     | AOI   | replicon    | bacteriocin     | class |
|------------|-------|-------------|-----------------|-------|
| 778        | AOI 1 | chromosome  | enterolysin A   | III   |
| 778        | AOI 1 | chromosome  | enterolysin A   | III   |
| 866        | AOI 1 | chromosome  | enterolysin A   | III   |
| 866        | AOI 1 | chromosome  | enterolysin A   | III   |
| 866        | AOI 1 | megaplasmid | salivaricin P   | II    |
| 01M14315   | AOI 1 | chromosome  | enterolysin A   | III   |
| 01M14315   | AOI 1 | chromosome  | enterolysin A   | III   |
| ACS116     | AOI 1 | chromosome  | enterolysin A   | III   |
| ACS116     | AOI 1 | chromosome  | enterolysin A   | III   |
| ACS116     | AOI 1 | chromosome  | enterolysin A   | III   |
| ACS116     | AOI 1 | chromosome  | enterolysin A   | III   |
| ACS116     | AOI 1 | megaplasmid | salivaricin P   | II    |
| AH4231     | AOI 1 | chromosome  | enterolysin A   | III   |
| AH4231     | AOI 1 | chromosome  | enterolysin A   | III   |
| AH4231     | AOI 1 | chromosome  | enterolysin A   | III   |
| AH4231     | AOI 1 | megaplasmid | salivaricin P   | II    |
| AH4331     | AOI 1 | chromosome  | enterolysin A   | III   |
| AH4331     | AOI 1 | chromosome  | enterolysin A   | III   |
| AH4331     | AOI 1 | chromosome  | enterolysin A   | III   |
| AH4331     | AOI 1 | megaplasmid | salivaricin P   | II    |
| AH43324    | AOI 1 | chromosome  | enterolysin A   | III   |
| AH43324    | AOI 1 | chromosome  | enterolysin A   | III   |
| AH43324    | AOI 1 | chromosome  | enterolysin A   | III   |
| AH43324    | AOI 1 | megaplasmid | salivaricin P   | II    |
| AH43348    | AOI 1 | chromosome  | enterolysin A   | III   |
| AH43348    | AOI 1 | chromosome  | enterolysin A   | III   |
| AH43348    | AOI 1 | chromosome  | enterolysin A   | III   |
| AH43348    | AOI 1 | megaplasmid | salivaricin P   | II    |
| ATCC11741  | AOI 1 | chromosome  | enterolysin A   | III   |
| CCUG2753OB | AOI 1 | chromosome  | enterolysin A   | III   |
| CCUG2753OB | AOI 1 | megaplasmid | LS2             | II    |
| CCUG38008  | AOI 1 | chromosome  | enterolysin A   | III   |
| CCUG38008  | AOI 1 | chromosome  | enterolysin A   | III   |
| CCUG38008  | AOI 1 | megaplasmid | salivaricin P   | II    |
| CCUG44481  | AOI 1 | chromosome  | enterolysin A   | III   |
| CCUG44481  | AOI 1 | megaplasmid | plantaricin S   | II    |
| CCUG44481  | AOI 2 | megaplasmid | plantaricin NC8 | II    |
| CCUG44481  | AOI 2 | megaplasmid | lactacin F      | II    |
| CCUG44481  | AOI 2 | megaplasmid | acidocin LF221B | II    |
| CCUG44481  | AOI 2 | megaplasmid | salivaricin P   | II    |
| CCUG45735  | AOI 1 | chromosome  | enterolysin A   | III   |
| CCUG45735  | AOI 1 | chromosome  | enterolysin A   | III   |
| CCUG45735  | AOI 1 | megaplasmid | salivaricin P   | II    |
| CCUG47171  | AOI 1 | chromosome  | enterolysin A   | III   |
| CCUG47171  | AOI 1 | chromosome  | enterolysin A   | III   |
| CCUG47171  | AOI 1 | megaplasmid | plantaricin NC8 | II    |
| CCUG47171  | AOI 1 | megaplasmid | lactacin F      | II    |
| CCUG47171  | AOI 1 | megaplasmid | acidocin LF221B | II    |
| CCUG47171  | AOI 1 | megaplasmid | salivaricin P   | II    |

|           |       |                    |                 |     |
|-----------|-------|--------------------|-----------------|-----|
| CCUG47825 | AOI 1 | chromosome         | enterolysin A   | III |
| CCUG47825 | AOI 1 | chromosome         | enterolysin A   | III |
| CCUG47826 | AOI 1 | chromosome         | enterolysin A   | III |
| CCUG47826 | AOI 1 | chromosome         | enterolysin A   | III |
| CCUG47826 | AOI 1 | chromosome         | enterolysin A   | III |
| CCUG47826 | AOI 1 | megaplasmid        | salivaricin P   | II  |
| CECT5713  | AOI 2 | chromosome         | enterolysin A   | III |
| CECT5713  | AOI 3 | chromosome         | enterolysin A   | III |
| CECT5713  | AOI 4 | chromosome         | enterolysin A   | III |
| CECT5713  | AOI 1 | megaplasmid        | salivaricin P   | II  |
| cp400     | AOI 1 | chromosome         | enterolysin A   | III |
| cp400     | AOI 1 | chromosome         | enterolysin A   | III |
| cp400     | AOI 1 | megaplasmid        | salivaricin P   | II  |
| DSM18933  | AOI 1 | chromosome         | enterolysin A   | III |
| DSM18933  | AOI 1 | chromosome         | enterolysin A   | III |
| DSM20492  | AOI 1 | chromosome         | enterolysin A   | III |
| DSM20554  | AOI 1 | chromosome         | enterolysin A   | III |
| DSM20554  | AOI 1 | chromosome         | enterolysin A   | III |
| DSM20554  | AOI 1 | small plasmid      | MR10B           | II  |
| DSM20555  | AOI 1 | chromosome         | enterolysin A   | III |
| GJ24      | AOI 1 | chromosome         | enterolysin A   | III |
| GJ24      | AOI 1 | megaplasmid        | plantaricin S   | II  |
| GJ24      | AOI 2 | megaplasmid        | plantaricin NC8 | II  |
| GJ24      | AOI 2 | megaplasmid        | salivaricin P   | II  |
| gul1      | AOI 1 | chromosome         | enterolysin A   | III |
| gul2      | AOI 1 | chromosome         | enterolysin A   | III |
| JCM1040   | AOI 1 | chromosome         | enterolysin A   | III |
| JCM1040   | AOI 1 | chromosome         | enterolysin A   | III |
| JCM1042   | AOI 1 | chromosome         | enterolysin A   | III |
| JCM1042   | AOI 1 | megaplasmid        | LS2             | II  |
| JCM1044   | AOI 1 | chromosome         | enterolysin A   | III |
| JCM1044   | AOI 1 | megaplasmid        | LS2             | II  |
| JCM1045   | AOI 1 | chromosome         | enterolysin A   | III |
| JCM1045   | AOI 1 | megaplasmid        | enterolysin A   | III |
| JCM1046   | AOI 1 | chromosome         | enterolysin A   | III |
| JCM1046   | AOI 1 | megaplasmid        | salivaricin P   | II  |
| JCM1046   | AOI 1 | linear megaplasmid | enterolysin A   | III |
| JCM1046   | AOI 1 | small plasmid      | MR10B           | II  |
| JCM1047   | AOI 1 | chromosome         | enterolysin A   | III |
| JCM1047   | AOI 1 | small plasmid      | MR10B           | II  |
| JCM1047   | AOI 1 | megaplasmid        | salivaricin P   | II  |
| JCM1047   | AOI 1 | linear megaplasmid | enterolysin A   | III |
| JCM1230   | AOI 1 | chromosome         | enterolysin A   | III |
| L21       | AOI 1 | chromosome         | enterolysin A   | III |
| L21       | AOI 1 | chromosome         | enterolysin A   | III |
| L21       | AOI 1 | megaplasmid        | salivaricin P   | II  |
| LMG14476  | AOI 1 | chromosome         | enterolysin A   | III |
| LMG14476  | AOI 1 | chromosome         | enterolysin A   | III |
| LMG14476  | AOI 1 | megaplasmid        | salivaricin P   | II  |
| LMG14477  | AOI 1 | chromosome         | enterolysin A   | III |

|             |       |             |               |     |
|-------------|-------|-------------|---------------|-----|
| LMG14477    | AOI 1 | chromosome  | enterolysin A | III |
| LMG14477    | AOI 1 | megaplasmid | salivaricin P | II  |
| NCIMB702343 | AOI 1 | chromosome  | enterolysin A | III |
| NCIMB702343 | AOI 1 | chromosome  | enterolysin A | III |
| NCIMB702343 | AOI 1 | megaplasmid | salivaricin P | II  |
| NCIMB8816   | AOI 1 | megaplasmid | LS2           | II  |
| NCIMB8816   | AOI 1 | chromosome  | enterolysin A | III |
| NCIMB8817   | AOI 1 | chromosome  | enterolysin A | III |
| NCIMB8818   | AOI 1 | chromosome  | enterolysin A | III |
| NCIMB8818   | AOI 1 | chromosome  | enterolysin A | III |
| NCIMB8818   | AOI 1 | megaplasmid | salivaricin P | II  |
| NIAS840     | AOI 1 | chromosome  | enterolysin A | III |
| Ren         | AOI 1 | chromosome  | enterolysin A | III |
| Ren         | AOI 2 | chromosome  | enterolysin A | III |
| SMXD51      | AOI 1 | chromosome  | enterolysin A | III |
| SMXD51      | AOI 1 | megaplasmid | LS2           | II  |
| UCC118      | AOI 1 | chromosome  | enterolysin A | III |
| UCC118      | AOI 2 | chromosome  | enterolysin A | III |
| UCC118      | AOI 3 | chromosome  | enterolysin A | III |
| UCC118      | AOI 1 | megaplasmid | salivaricin P | II  |

Table S4

| strain     | classification                   | taxon nucleotide % | taxon nucleotides | contig count |
|------------|----------------------------------|--------------------|-------------------|--------------|
| 01M14315   | Lactobacillus_salivarius         | 97.9012            | 1755411           | 67           |
| 01M14315   | unclassified                     | 1.96655            | 35261             | 6            |
| 01M14315   | Lactobacillus_fermentum          | 0.124593           | 2234              | 1            |
| 01M14315   | Lactobacillus_casei_group        | 0.00764064         | 137               | 1            |
| 778        | Lactobacillus_salivarius         | 99.3133            | 1921066           | 36           |
| 778        | unclassified                     | 0.686742           | 13284             | 1            |
| 866        | Lactobacillus_salivarius         | 100                | 1963667           | 75           |
| ACS116     | Lactobacillus_salivarius         | 100                | 1956854           | 132          |
| AH4231     | Lactobacillus_salivarius         | 97.1495            | 1950134           | 121          |
| AH4231     | unclassified                     | 2.45587            | 49298             | 32           |
| AH4231     | Lactobacillus_casei_group        | 0.212867           | 4273              | 9            |
| AH4231     | Lactobacillus_fermentum          | 0.181732           | 3648              | 2            |
| AH4331     | Lactobacillus_salivarius         | 97.1714            | 1947771           | 115          |
| AH4331     | unclassified                     | 2.47302            | 49571             | 33           |
| AH4331     | Lactobacillus_casei_group        | 0.181594           | 3640              | 8            |
| AH4331     | Lactobacillus_fermentum          | 0.174011           | 3488              | 1            |
| AH43324    | Lactobacillus_salivarius         | 98.4574            | 1942606           | 87           |
| AH43324    | unclassified                     | 1.54259            | 30436             | 1            |
| AH43348    | Lactobacillus_salivarius         | 100                | 2028360           | 109          |
| ATCC11741  | Lactobacillus_salivarius         | 99.9018            | 1897727           | 40           |
| ATCC11741  | unclassified                     | 0.0484841          | 921               | 4            |
| ATCC11741  | Corynebacterium_aurimucosum      | 0.0243736          | 463               | 2            |
| ATCC11741  | Erysipelothrix_rhusiopathiae     | 0.0126869          | 241               | 1            |
| ATCC11741  | Rhodococcus_equi                 | 0.0126869          | 241               | 1            |
| CCuG2753OB | Lactobacillus_salivarius         | 100                | 1790291           | 42           |
| CCuG38008  | Lactobacillus_salivarius         | 98.1458            | 1895829           | 67           |
| CCuG38008  | unclassified                     | 1.82684            | 35288             | 10           |
| CCuG38008  | Lactobacillus_casei_group        | 0.0273342          | 528               | 2            |
| CCuG44481  | Lactobacillus_salivarius         | 96.0994            | 1812482           | 54           |
| CCuG44481  | unclassified                     | 2.94823            | 55605             | 5            |
| CCuG44481  | Lactobacillus_reuteri            | 0.738793           | 13934             | 1            |
| CCuG44481  | Clostridium_sp._SY8519           | 0.213621           | 4029              | 1            |
| CCuG45735  | Lactobacillus_salivarius         | 99.9105            | 1947895           | 69           |
| CCuG45735  | Lactobacillus_helveticus         | 0.0802713          | 1565              | 1            |
| CCuG45735  | unclassified                     | 0.00918119         | 179               | 1            |
| CCuG47171  | Lactobacillus_salivarius         | 97.6392            | 1974695           | 82           |
| CCuG47171  | unclassified                     | 1.87664            | 37954             | 22           |
| CCuG47171  | Lactobacillus_casei_group        | 0.32352            | 6543              | 7            |
| CCuG47171  | Lactobacillus_plantarum          | 0.160598           | 3248              | 1            |
| CCuG47825  | Lactobacillus_salivarius         | 99.8319            | 1786862           | 97           |
| CCuG47825  | unclassified                     | 0.114757           | 2054              | 3            |
| CCuG47825  | Streptococcus_dysgalactiae_group | 0.0323487          | 579               | 2            |
| CCuG47825  | Citrobacter_rodentium_ICC168     | 0.0209512          | 375               | 1            |
| CCuG47826  | Lactobacillus_salivarius         | 99.1878            | 1940444           | 50           |
| CCuG47826  | unclassified                     | 0.783915           | 15336             | 5            |
| CCuG47826  | Lactobacillus_sanfranciscensis   | 0.0221332          | 433               | 3            |
| CCuG47826  | Lactobacillus_casei_group        | 0.00618504         | 121               | 1            |
| CECT5713   | Lactobacillus_salivarius         | 100                | 2136138           | 4            |
| cp400      | Lactobacillus_salivarius         | 98.7922            | 2016437           | 72           |
| cp400      | Lactobacillus_reuteri            | 1.20779            | 24652             | 2            |
| DSM18933   | unclassified                     | 93.4389            | 6964              | 18           |
| DSM18933   | Lactobacillus_salivarius         | 6.56112            | 489               | 3            |
| DSM20492   | Lactobacillus_salivarius         | 100                | 1890069           | 30           |
| DSM20554   | Lactobacillus_salivarius         | 100                | 1949872           | 51           |
| DSM20555   | Lactobacillus_salivarius         | 100                | 1874089           | 44           |



|             |                                |            |         |     |
|-------------|--------------------------------|------------|---------|-----|
| GJ24        | Lactobacillus_salivarius       | 99.7466    | 1986988 | 8   |
| GJ24        | unclassified                   | 0.253359   | 5047    | 1   |
| gul1        | Lactobacillus_salivarius       | 100        | 1907028 | 62  |
| gul2        | Lactobacillus_salivarius       | 99.982     | 1908848 | 68  |
| gul2        | unclassified                   | 0.011628   | 222     | 1   |
| gul2        | Lactobacillus_johnsonii        | 0.00633776 | 121     | 1   |
| JCM1040     | Lactobacillus_salivarius       | 98.5093    | 1822228 | 46  |
| JCM1040     | unclassified                   | 1.48416    | 27454   | 7   |
| JCM1040     | Lactobacillus_casei_group      | 0.00654124 | 121     | 1   |
| JCM1042     | Lactobacillus_salivarius       | 100        | 1789991 | 54  |
| JCM1044     | Lactobacillus_salivarius       | 100        | 1788967 | 53  |
| JCM1045     | Lactobacillus_salivarius       | 100        | 1928808 | 64  |
| JCM1046     | Lactobacillus_salivarius       | 94.2248    | 1802918 | 91  |
| JCM1046     | unclassified                   | 4.7194     | 90302   | 6   |
| JCM1046     | Lactobacillus_reuteri          | 1.0558     | 20202   | 3   |
| JCM1047     | Lactobacillus_salivarius       | 98.613     | 2040949 | 81  |
| JCM1047     | unclassified                   | 1.38704    | 28707   | 1   |
| JCM1230     | Lactobacillus_salivarius       | 100        | 1656507 | 38  |
| L21         | Lactobacillus_salivarius       | 99.7884    | 1927838 | 60  |
| L21         | unclassified                   | 0.195349   | 3774    | 5   |
| L21         | Lactobacillus_sanfranciscensis | 0.0162532  | 314     | 2   |
| LMG14476    | Lactobacillus_salivarius       | 100        | 1887993 | 157 |
| LMG14477    | Lactobacillus_salivarius       | 99.99      | 1822244 | 144 |
| LMG14477    | unclassified                   | 0.00998669 | 182     | 1   |
| NCIMB702343 | Lactobacillus_salivarius       | 99.9607    | 1884140 | 42  |
| NCIMB702343 | unclassified                   | 0.0393128  | 741     | 2   |
| NCIMB8816   | Lactobacillus_salivarius       | 99.0933    | 1820558 | 61  |
| NCIMB8816   | unclassified                   | 0.785101   | 14424   | 7   |
| NCIMB8816   | Lactobacillus_casei_group      | 0.121597   | 2234    | 1   |
| NCIMB8817   | Lactobacillus_salivarius       | 100        | 1814802 | 45  |
| NCIMB8818   | Lactobacillus_salivarius       | 97.8194    | 1970529 | 67  |
| NCIMB8818   | unclassified                   | 1.99051    | 40098   | 9   |
| NCIMB8818   | Lactobacillus_casei_group      | 0.120231   | 2422    | 2   |
| NCIMB8818   | Streptococcus_anginosus_group  | 0.0698948  | 1408    | 1   |
| NIAS840     | Lactobacillus_salivarius       | 100        | 1866462 | 3   |
| Ren         | Lactobacillus_salivarius       | 100        | 1978364 | 3   |
| SMXD51      | Lactobacillus_salivarius       | 98.4374    | 1928066 | 8   |
| SMXD51      | unclassified                   | 1.56264    | 30607   | 1   |
| UCC118      | Lactobacillus_salivarius       | 100        | 2133977 | 4   |

**Table S5**

|                 | UCC118 + | UCC118 - | CECT5713 + | CECT5713 - | NIAS840 + | NIAS840 - | Ren + | Ren - |
|-----------------|----------|----------|------------|------------|-----------|-----------|-------|-------|
| chromosome      | 100      | 0        | 100        | 0          | 100       | 0         | 100   | 0     |
| megaplasmid 1   | 100      | 0        | 100        | 0          | 97.5      | 2.5       | 85.3  | 14.7  |
| megaplasmid 2   | NA       | NA       | NA         | NA         | 8.3       | 91.7      | NA    | NA    |
| small plasmid 1 | 100      | 0        | 100        | 0          | 0         | 100       | 90.7  | 9.3   |
| small plasmid 2 | 100      | 0        | 100        | 0          | NA        | NA        | NA    | NA    |

Table S6

| Aspartic (A) Peptidases |           |                                                                                                                                 |
|-------------------------|-----------|---------------------------------------------------------------------------------------------------------------------------------|
| FAMILY                  | SUBFAMILY | TYPE ENZYME                                                                                                                     |
| A1                      | A1A       | pepsin A (Homo sapiens)                                                                                                         |
|                         | A1B       | nepenthesin ( <i>Nepenthes gracilis</i> )                                                                                       |
| A2                      | A2A       | HIV-1 retropepsin (human immunodeficiency virus 1)                                                                              |
|                         | A2B       | Ty3 transposon peptidase ( <i>Saccharomyces cerevisiae</i> )                                                                    |
|                         | A2C       | Gypsy transposon peptidase ( <i>Drosophila melanogaster</i> )                                                                   |
|                         | A2D       | Oswaldo retrotransposon peptidase ( <i>Drosophila buzzatii</i> )                                                                |
| A3                      | A3A       | cauliflower mosaic virus-type peptidase (cauliflower mosaic virus)                                                              |
|                         | A3B       | bacilliform virus peptidase (rice tungro bacilliform virus)                                                                     |
| A5                      |           | thermopsin ( <i>Sulfolobus acidocaldarius</i> )                                                                                 |
| A8                      |           | signal peptidase II ( <i>Escherichia coli</i> )                                                                                 |
| A9                      |           | spumapepsin (human spumaretrovirus)                                                                                             |
| A11                     | A11A      | Copia transposon peptidase ( <i>Drosophila melanogaster</i> )                                                                   |
|                         | A11B      | Ty1 transposon peptidase ( <i>Saccharomyces cerevisiae</i> )                                                                    |
| A22                     | A22A      | presenilin 1 (Homo sapiens)                                                                                                     |
|                         | A22B      | impas 1 peptidase (Homo sapiens)                                                                                                |
| A24                     | A24A      | type 4 prepilin peptidase 1 ( <i>Pseudomonas aeruginosa</i> )                                                                   |
|                         | A24B      | FlaK peptidase ( <i>Methanococcus marisaludis</i> )                                                                             |
| A25                     |           | gpr peptidase ( <i>Bacillus megaterium</i> )                                                                                    |
| A26                     |           | omptin ( <i>Escherichia coli</i> )                                                                                              |
| A28                     | A28A      | DNA-damage inducible protein 1 ( <i>Saccharomyces cerevisiae</i> )                                                              |
|                         | A28B      | skin SASPase ( <i>Mus musculus</i> )                                                                                            |
| A31                     |           | HydD peptidase ( <i>Escherichia coli</i> )                                                                                      |
| A32                     |           | PerP peptidase ( <i>Caulobacter crescentus</i> )                                                                                |
| A36                     |           | sporulation factor SpoIIIGA ( <i>Bacillus subtilis</i> )                                                                        |
| Cysteine (C) Peptidases |           |                                                                                                                                 |
| FAMILY                  | SUBFAMILY | TYPE ENZYME                                                                                                                     |
| C1                      | C1A       | papain ( <i>Carica papaya</i> )                                                                                                 |
|                         | C1B       | bleomycin hydrolase ( <i>Saccharomyces cerevisiae</i> )                                                                         |
| C2                      | C2A       | calpain-2 (Homo sapiens)                                                                                                        |
| C3                      | C3A       | poliovirus-type picornain 3C (human poliovirus 1)                                                                               |
|                         | C3B       | enterovirus picornain 2A (human poliovirus 1)                                                                                   |
|                         | C3C       | foot-and-mouth disease virus picornain 3C (foot-and-mouth disease virus)                                                        |
|                         | C3D       | cowpea mosaic comovirus-type picornain 3C (cowpea mosaic virus)                                                                 |
|                         | C3E       | hepatitis A virus-type picornain 3C (hepatitis A virus)                                                                         |
|                         | C3F       | parechovirus picornain 3C (human parechovirus 1)                                                                                |
|                         | C3G       | rice tungro spherical virus-type peptidase (rice tungro spherical virus)                                                        |
|                         | C3H       | grapevine fanleaf-type nepovirus picornain 3C (grapevine fanleaf virus)                                                         |
| C4                      |           | nuclear-inclusion-a peptidase (plum pox virus)                                                                                  |
| C5                      |           | adenain (human adenovirus type 2)                                                                                               |
| C6                      |           | potato virus Y-type helper component peptidase (potato virus Y)                                                                 |
| C7                      |           | chestnut blight fungus virus p29 peptidase ( <i>Cryphonectria hypovirus</i> )                                                   |
| C8                      |           | chestnut blight fungus virus p48 peptidase ( <i>Cryphonectria hypovirus 1</i> )                                                 |
| C9                      |           | sindbis virus-type nsP2 peptidase (Sindbis virus)                                                                               |
| C10                     |           | streptopain ( <i>Streptococcus pyogenes</i> )                                                                                   |
| C11                     |           | clostripain ( <i>Clostridium histolyticum</i> )                                                                                 |
| C12                     |           | ubiquitinyl hydrolase-L1 (Homo sapiens)                                                                                         |
| C13                     |           | legumain ( <i>Canavalia ensiformis</i> )                                                                                        |
| C14                     | C14A      | caspase-1 ( <i>Rattus norvegicus</i> )                                                                                          |
|                         | C14B      | metacaspase Yca1 ( <i>Saccharomyces cerevisiae</i> )                                                                            |
| C15                     |           | pyroglutamyl-peptidase I ( <i>Bacillus amyloliquefaciens</i> )                                                                  |
| C16                     | C16A      | murine hepatitis coronavirus papain-like peptidase 1 (murine hepatitis virus)                                                   |
|                         | C16B      | murine hepatitis coronavirus papain-like peptidase 2 (murine hepatitis virus)                                                   |
| C18                     |           | hepatitis C virus peptidase 2 (hepatitis C virus)                                                                               |
| C19                     |           | ubiquitin-specific peptidase 14 (Homo sapiens)                                                                                  |
| C21                     |           | tymovirus peptidase (turnip yellow mosaic virus)                                                                                |
| C23                     |           | carlavirus peptidase (apple stem pitting virus)                                                                                 |
| C24                     |           | rabbit hemorrhagic disease virus 3C-like peptidase (rabbit hemorrhagic disease virus)                                           |
| C25                     |           | gingipain RgpA ( <i>Porphyromonas gingivalis</i> )                                                                              |
| C26                     |           | gamma-glutamyl hydrolase ( <i>Rattus norvegicus</i> )                                                                           |
| C27                     |           | rubella virus peptidase (Rubella virus)                                                                                         |
| C28                     |           | foot-and-mouth disease virus L-peptidase (foot-and-mouth disease virus)                                                         |
| C30                     |           | porcine transmissible gastroenteritis virus-type main peptidase (transmissible gastroenteritis virus)                           |
| C31                     |           | porcine reproductive and respiratory syndrome arterivirus-type cysteine peptidase alpha (lactate-dehydrogenase-elevating virus) |
| C32                     |           | equine arteritis virus-type cysteine peptidase (porcine reproductive and respiratory syndrome virus)                            |
| C33                     |           | equine arteritis virus Nsp2-type cysteine peptidase (equine arteritis virus)                                                    |
| C36                     |           | beet necrotic yellow vein furovirus-type papain-like peptidase (beet necrotic yellow vein virus)                                |
| C37                     |           | calicivirin (Southampton virus)                                                                                                 |
| C39                     |           | bacteriocin-processing peptidase ( <i>Pediococcus acidilactici</i> )                                                            |
| C40                     |           | dipeptidyl-peptidase VI ( <i>Lysinibacillus sphaericus</i> )                                                                    |
| C42                     |           | beet yellows virus-type papain-like peptidase (beet yellows virus)                                                              |
| C44                     |           | amidophosphoribosyltransferase precursor (Homo sapiens)                                                                         |
| C45                     |           | acyl-coenzyme A:6-aminopenicillanic acid acyl-transferase precursor ( <i>Penicillium chrysogenum</i> )                          |
| C46                     |           | hedgehog protein ( <i>Drosophila melanogaster</i> )                                                                             |
| C47                     |           | staphopain A ( <i>Staphylococcus aureus</i> )                                                                                   |
| C48                     |           | Ulp1 peptidase ( <i>Saccharomyces cerevisiae</i> )                                                                              |
| C50                     |           | separase ( <i>Saccharomyces cerevisiae</i> )                                                                                    |
| C51                     |           | D-alanyl-glycyl peptidase ( <i>Staphylococcus aureus</i> )                                                                      |
| C53                     |           | pestivirus Npro peptidase (classical swine fever virus)                                                                         |
| C54                     |           | autophagin-1 (Homo sapiens)                                                                                                     |
| C55                     |           | YopJ protein ( <i>Yersinia pseudotuberculosis</i> )                                                                             |
| C56                     |           | PfpI peptidase ( <i>Pyrococcus furiosus</i> )                                                                                   |
| C57                     |           | vaccinia virus I7L processing peptidase (Vaccinia virus)                                                                        |
| C58                     | C58A      | YopT peptidase ( <i>Yersinia pestis</i> )                                                                                       |
|                         | C58B      | HopN1 peptidase ( <i>Pseudomonas syringae</i> )                                                                                 |
| C59                     |           | penicillin V acylase precursor ( <i>Lysinibacillus sphaericus</i> )                                                             |
| C60                     | C60A      | sortase A ( <i>Staphylococcus aureus</i> )                                                                                      |
|                         | C60B      | sortase B ( <i>Staphylococcus aureus</i> )                                                                                      |
| C62                     |           | gill-associated virus 3C-like peptidase (gill-associated virus)                                                                 |
| C63                     |           | African swine fever virus processing peptidase (African swine fever virus)                                                      |
| C64                     |           | Cezanne peptidase (Homo sapiens)                                                                                                |
| C65                     |           | otubain-1 (Homo sapiens)                                                                                                        |
| C66                     |           | IdeS peptidase ( <i>Streptococcus pyogenes</i> )                                                                                |
| C67                     |           | CyID peptidase (Homo sapiens)                                                                                                   |
| C69                     |           | dipeptidase A ( <i>Lactobacillus helveticus</i> )                                                                               |

|                         |           |                                                                                         |
|-------------------------|-----------|-----------------------------------------------------------------------------------------|
| C70                     |           | AvrRpt2 peptidase ( <i>Pseudomonas syringae</i> )                                       |
| C71                     |           | pseudomurein endoisopeptidase Pei ( <i>Methanobacterium phage psiM2</i> )               |
| C74                     |           | pestivirus NS2 peptidase (bovine viral diarrhoea virus 1)                               |
| C75                     |           | AgrB peptidase ( <i>Staphylococcus aureus</i> )                                         |
| C76                     |           | viral tegument protein deubiquitylating peptidase (human herpesvirus 1)                 |
| C78                     |           | UfSP1 peptidase ( <i>Mus musculus</i> )                                                 |
| C79                     |           | ElaD peptidase ( <i>Escherichia coli</i> )                                              |
| C80                     |           | RTX self-cleaving toxin ( <i>Vibrio cholerae</i> )                                      |
| C82                     | C82A      | L,D-transpeptidase ( <i>Enterococcus faecium</i> )                                      |
| C83                     |           | gamma-glutamylcysteine dipeptidyltranspeptidase ( <i>Nostoc</i> sp. PCC 7120)           |
| C84                     |           | prtH peptidase ( <i>Tannerella forsythia</i> )                                          |
| C85                     | C85A      | OTLD1 deubiquitylating enzyme ( <i>Homo sapiens</i> )                                   |
|                         | C85B      | OTU1 peptidase ( <i>Saccharomyces cerevisiae</i> )                                      |
| C86                     |           | ataxin-3 ( <i>Homo sapiens</i> )                                                        |
| C87                     |           | nairovirus deubiquitylating peptidase (Crimean-Congo hemorrhagic fever virus)           |
| C89                     |           | acid ceramidase precursor ( <i>Homo sapiens</i> )                                       |
| C93                     |           | LapG peptidase ( <i>Pseudomonas fluorescens</i> )                                       |
| C95                     |           | lysosomal 66.3 kDa protein ( <i>Mus musculus</i> )                                      |
| C96                     |           | McjB peptidase ( <i>Escherichia coli</i> )                                              |
| C97                     |           | DeS1-1 peptidase ( <i>Mus musculus</i> )                                                |
| C98                     |           | USPL1 peptidase ( <i>Homo sapiens</i> )                                                 |
| C99                     |           | iflavivirus processing peptidase ( <i>Ectropis obliqua picorna-like virus</i> )         |
| C101                    |           | OTULIN peptidase ( <i>Homo sapiens</i> )                                                |
| C102                    |           | GtgE peptidase ( <i>Salmonella enterica</i> )                                           |
| C104                    |           | PlyC phage lysin ( <i>Streptococcus phage C1</i> )                                      |
| C105                    |           | papain-like peptidase 1 alpha (simian hemorrhagic fever virus)                          |
| C107                    |           | alphamesonivirus 3C-like peptidase (Cavally virus)                                      |
| C108                    |           | Prp peptidase ( <i>Staphylococcus aureus</i> )                                          |
| C110                    |           | kyphoscoliosis peptidase ( <i>Mus musculus</i> )                                        |
| C111                    |           | coagulation factor XIIIa ( <i>Homo sapiens</i> )                                        |
| C113                    |           | lgdE peptidase ( <i>Streptococcus suis</i> )                                            |
| Glutamic (G) Peptidases |           |                                                                                         |
| FAMILY                  |           |                                                                                         |
| G1                      | SUBFAMILY | TYPE ENZYME                                                                             |
|                         |           | scytalidoglutamic peptidase ( <i>Scytalidium lignicolum</i> )                           |
| G2                      |           | pre-neck appendage protein (bacteriophage phi-29)                                       |
| Metallo (M) Peptidases  |           |                                                                                         |
| FAMILY                  |           |                                                                                         |
| M1                      | SUBFAMILY | TYPE ENZYME                                                                             |
|                         |           | aminopeptidase N ( <i>Homo sapiens</i> )                                                |
| M2                      |           | angiotensin-converting enzyme peptidase unit 1 ( <i>Homo sapiens</i> )                  |
| M3                      | M3A       | thimet oligopeptidase ( <i>Rattus norvegicus</i> )                                      |
|                         | M3B       | oligopeptidase F ( <i>Lactococcus lactis</i> )                                          |
| M4                      |           | thermolysin ( <i>Bacillus thermoproteolyticus</i> )                                     |
| M5                      |           | mycolysin ( <i>Streptomyces cacaoi</i> )                                                |
| M6                      |           | immune inhibitor A peptidase ( <i>Bacillus thuringiensis</i> )                          |
| M7                      |           | snapalysin ( <i>Streptomyces lividans</i> )                                             |
| M8                      |           | leishmanolysin ( <i>Leishmania major</i> )                                              |
| M9                      | M9A       | bacterial collagenase V ( <i>Vibrio alginolyticus</i> )                                 |
|                         | M9B       | bacterial collagenase H ( <i>Clostridium histolyticum</i> )                             |
| M10                     | M10A      | matrix metallopeptidase-1 ( <i>Homo sapiens</i> )                                       |
|                         | M10B      | serralysin ( <i>Serratia marcescens</i> )                                               |
|                         | M10C      | fragilysin ( <i>Bacteroides fragilis</i> )                                              |
| M11                     |           | gametolysin ( <i>Chlamydomonas reinhardtii</i> )                                        |
| M12                     | M12A      | astacin ( <i>Astacus astacus</i> )                                                      |
|                         | M12B      | adamalysin ( <i>Crotalus adamanteus</i> )                                               |
| M13                     |           | neprilysin ( <i>Homo sapiens</i> )                                                      |
| M14                     | M14A      | carboxypeptidase A1 ( <i>Homo sapiens</i> )                                             |
|                         | M14B      | carboxypeptidase E ( <i>Bos taurus</i> )                                                |
|                         | M14C      | gamma-D-glutamyl--meso-diaminopimelate peptidase I ( <i>Lysinibacillus sphaericus</i> ) |
|                         | M14D      | cytosolic carboxypeptidase 6 ( <i>Homo sapiens</i> )                                    |
| M15                     | M15A      | zinc D-Ala-D-Ala carboxypeptidase ( <i>Streptomyces albus</i> )                         |
|                         | M15B      | vanY D-Ala-D-Ala carboxypeptidase ( <i>Enterococcus faecium</i> )                       |
|                         | M15C      | Ply118 L-Ala-D-Glu peptidase (bacteriophage A118)                                       |
|                         | M15D      | vanX D-Ala-D-Ala dipeptidase ( <i>Enterococcus faecium</i> )                            |
| M16                     | M16A      | pitriylisin ( <i>Escherichia coli</i> )                                                 |
|                         | M16B      | mitochondrial processing peptidase beta-subunit ( <i>Saccharomyces cerevisiae</i> )     |
|                         | M16C      | eupitriylisin ( <i>Homo sapiens</i> )                                                   |
| M17                     |           | leucine aminopeptidase 3 ( <i>Bos taurus</i> )                                          |
| M18                     |           | aminopeptidase I ( <i>Saccharomyces cerevisiae</i> )                                    |
| M19                     |           | membrane dipeptidase ( <i>Homo sapiens</i> )                                            |
| M20                     | M20A      | glutamate carboxypeptidase ( <i>Pseudomonas</i> sp.)                                    |
|                         | M20B      | peptidase T ( <i>Escherichia coli</i> )                                                 |
|                         | M20C      | Xaa-His dipeptidase ( <i>Escherichia coli</i> )                                         |
|                         | M20D      | carboxypeptidase Ss1 ( <i>Sulfolobus solfataricus</i> )                                 |
|                         | M20F      | carnosine dipeptidase II ( <i>Mus musculus</i> )                                        |
| M23                     | M23A      | beta-lytic metallopeptidase ( <i>Achromobacter lyticus</i> )                            |
|                         | M23B      | lysostaphin ( <i>Staphylococcus simulans</i> )                                          |
| M24                     | M24A      | methionyl aminopeptidase 1 ( <i>Escherichia coli</i> )                                  |
|                         | M24B      | aminopeptidase P ( <i>Escherichia coli</i> )                                            |
| M26                     |           | IgA1-specific metallopeptidase ( <i>Streptococcus sanguinis</i> )                       |
| M27                     |           | tentoxilysin ( <i>Clostridium tetani</i> )                                              |
| M28                     | M28A      | aminopeptidase S ( <i>Streptomyces griseus</i> )                                        |
|                         | M28B      | glutamate carboxypeptidase II ( <i>Homo sapiens</i> )                                   |
|                         | M28C      | IAP aminopeptidase ( <i>Escherichia coli</i> )                                          |
|                         | M28D      | aminopeptidase ES-62 ( <i>Acanthocheilonea viteae</i> )                                 |
|                         | M28E      | aminopeptidase Ap1 ( <i>Vibrio proteolyticus</i> )                                      |
|                         | M28F      | ywaD peptidase ( <i>Bacillus subtilis</i> )                                             |
| M29                     |           | aminopeptidase T ( <i>Thermus aquaticus</i> )                                           |
| M30                     |           | hycolysin ( <i>Staphylococcus hyicus</i> )                                              |
| M32                     |           | carboxypeptidase Taq ( <i>Thermus aquaticus</i> )                                       |
| M34                     |           | anthrax lethal factor ( <i>Bacillus anthracis</i> )                                     |
| M35                     |           | deuterolysin ( <i>Aspergillus flavus</i> )                                              |
| M36                     |           | fungalsin ( <i>Aspergillus fumigatus</i> )                                              |
| M38                     |           | isoaspartyl dipeptidase ( <i>Escherichia coli</i> )                                     |
| M41                     |           | FtsH peptidase ( <i>Escherichia coli</i> )                                              |
| M42                     |           | glutamyl aminopeptidase ( <i>Lactococcus lactis</i> )                                   |
| M43                     | M43A      | cytophagalsin ( <i>Cytophaga</i> sp.)                                                   |

|                               |           |                                                                                       |
|-------------------------------|-----------|---------------------------------------------------------------------------------------|
|                               | M43B      | pappalysin-1 (Homo sapiens)                                                           |
| M44                           |           | pox virus metallopeptidase (Vaccinia virus)                                           |
| M48                           | M48A      | Ste24 peptidase (Saccharomyces cerevisiae)                                            |
|                               | M48B      | HtpX peptidase (Escherichia coli)                                                     |
|                               | M48C      | Oma1 peptidase (Saccharomyces cerevisiae)                                             |
| M49                           |           | dipeptidyl-peptidase III (Rattus norvegicus)                                          |
| M50                           | M50A      | site 2 peptidase (Homo sapiens)                                                       |
|                               | M50B      | sporulation factor SpoIVFB (Bacillus subtilis)                                        |
| M54                           |           | archaelysin (Methanocaldococcus jannaschii)                                           |
| M55                           |           | D-aminopeptidase DppA (Bacillus subtilis)                                             |
| M56                           |           | BlaR1 peptidase (Staphylococcus aureus)                                               |
| M57                           |           | prtB g.p. (Myxococcus xanthus)                                                        |
| M60                           |           | enhancin (Lymantria dispar nucleopolyhedrovirus)                                      |
| M61                           |           | glycyl aminopeptidase (Sphingomonas capsulata)                                        |
| M64                           |           | IgA peptidase (Clostridium ramosum)                                                   |
| M66                           |           | StcE peptidase (Escherichia coli)                                                     |
| M67                           | M67A      | RPN11 peptidase (Saccharomyces cerevisiae)                                            |
|                               | M67B      | JAMM-like protein (Archaeoglobus fulgidus)                                            |
|                               | M67C      | STAMBP isopeptidase (Homo sapiens)                                                    |
| M72                           |           | peptidyl-Asp metallopeptidase (Pseudomonas aeruginosa)                                |
| M73                           |           | camelysin (Bacillus cereus)                                                           |
| M74                           |           | murein endopeptidase (Escherichia coli)                                               |
| M75                           |           | imelysin (Pseudomonas aeruginosa)                                                     |
| M76                           |           | Atp23 peptidase (Homo sapiens)                                                        |
| M77                           |           | tryptophanyl aminopeptidase 7-DMATS-type peptidase (Aspergillus fumigatus)            |
| M78                           |           | ImmA peptidase (Bacillus subtilis)                                                    |
| M79                           |           | RCE1 peptidase (Saccharomyces cerevisiae)                                             |
| M80                           |           | Wss1 peptidase (Saccharomyces cerevisiae)                                             |
| M81                           |           | microcystinase MlrC (Sphingomonas sp. ACM-3962)                                       |
| M82                           |           | PrsW peptidase (Bacillus subtilis)                                                    |
| M84                           |           | MpriBi peptidase (Bacillus intermedius)                                               |
| M85                           |           | NleC peptidase (Escherichia coli)                                                     |
| M86                           |           | PghP gamma-polyglutamate hydrolase (Bacillus phage phiNIT1)                           |
| M87                           |           | chloride channel accessory protein 1 (Homo sapiens)                                   |
| M88                           |           | IMPa peptidase (Pseudomonas aeruginosa)                                               |
| M90                           |           | MtfA peptidase (Escherichia coli)                                                     |
| M91                           |           | NleD peptidase (Escherichia coli)                                                     |
| M93                           |           | BACCAC_01431 g.p. and similar (Bacteroides caccae)                                    |
| M95                           |           | selecase (Methanocaldococcus jannaschii)                                              |
| M96                           |           | Tiki1 peptidase (Homo sapiens)                                                        |
| M97                           |           | EcxAB peptidase (Escherichia coli)                                                    |
| M98                           |           | YghJ g.p. (Escherichia coli)                                                          |
| M99                           |           | Csd4 peptidase (Helicobacter pylori)                                                  |
| Asparagine (N) Peptide Lyases |           |                                                                                       |
| FAMILY                        |           |                                                                                       |
|                               | SUBFAMILY | TYPE ENZYME                                                                           |
| N1                            |           | nodavirus peptidase (flock house virus)                                               |
| N2                            |           | tetrahymena coat protein (Nudaurelia capensis omega virus)                            |
| N4                            |           | Tsh-associated self-cleaving domain and similar (Escherichia coli)                    |
| N5                            |           | picobirnavirus self-cleaving protein (Human picobirnavirus)                           |
| N6                            |           | YscU protein (Yersinia pseudotuberculosis)                                            |
| N7                            |           | reovirus type 1 coat protein (Mammalian orthoreovirus 1)                              |
| N8                            |           | poliovirus capsid VP0-type self-cleaving protein (human poliovirus 1)                 |
| N9                            |           | intein-containing V-type proton ATPase catalytic subunit A (Saccharomyces cerevisiae) |
| N10                           |           | intein-containing replicative DNA helicase precursor (Synechocystis sp. PCC 6803)     |
| N11                           |           | intein-containing chloroplast ATP-dependent peptide lyase (Chlamydomonas eugametos)   |
| Mixed (P) Peptidases          |           |                                                                                       |
| FAMILY                        |           |                                                                                       |
|                               | SUBFAMILY | TYPE ENZYME                                                                           |
| P1                            |           | DmpA aminopeptidase (Ochrobactrum anthropi)                                           |
| P2                            | P2A       | EGF-like module containing mucin-like hormone receptor-like 2 (Homo sapiens)          |
|                               | P2B       | polycystin-1 (Homo sapiens)                                                           |
| Serine (S) Peptidases         |           |                                                                                       |
| FAMILY                        |           |                                                                                       |
|                               | SUBFAMILY | TYPE ENZYME                                                                           |
| S1                            | S1A       | chymotrypsin A (Bos taurus)                                                           |
|                               | S1B       | glutamyl endopeptidase I (Staphylococcus aureus)                                      |
|                               | S1C       | DegP peptidase (Escherichia coli)                                                     |
|                               | S1D       | lysyl endopeptidase (Achromobacter lyticus)                                           |
|                               | S1E       | streptogrisin A (Streptomyces griseus)                                                |
|                               | S1F       | astrovirus serine peptidase (Mamastrovirus 1)                                         |
| S3                            |           | togavirin (Sindbis virus)                                                             |
| S6                            |           | IgA1-specific serine peptidase (Neisseria gonorrhoeae)                                |
| S7                            |           | flavivirin (yellow fever virus)                                                       |
| S8                            | S8A       | subtilisin Carlsberg (Bacillus licheniformis)                                         |
|                               | S8B       | kexin (Saccharomyces cerevisiae)                                                      |
| S9                            | S9A       | prolyl oligopeptidase (Sus scrofa)                                                    |
|                               | S9B       | dipeptidyl-peptidase IV (Homo sapiens)                                                |
|                               | S9C       | acylaminoacyl-peptidase (Homo sapiens)                                                |
|                               | S9D       | glutamyl endopeptidase C (Arabidopsis thaliana)                                       |
| S10                           |           | carboxypeptidase Y (Saccharomyces cerevisiae)                                         |
| S11                           |           | D-Ala-D-Ala carboxypeptidase A (Geobacillus stearothermophilus)                       |
| S12                           |           | D-Ala-D-Ala carboxypeptidase B (Streptomyces lividans)                                |
| S13                           |           | D-Ala-D-Ala peptidase C (Escherichia coli)                                            |
| S14                           |           | peptidase Clp (Escherichia coli)                                                      |
| S15                           |           | Xaa-Pro dipeptidyl-peptidase (Lactococcus lactis)                                     |
| S16                           |           | Lon-A peptidase (Escherichia coli)                                                    |
| S21                           |           | cytomegalovirus assemblin (human herpesvirus 5)                                       |
| S24                           |           | repressor LexA (Escherichia coli)                                                     |
| S26                           | S26A      | signal peptidase I (Escherichia coli)                                                 |
|                               | S26B      | signalase 21 kDa component (Saccharomyces cerevisiae)                                 |
|                               | S26C      | TraF peptidase (Escherichia coli)                                                     |
| S28                           |           | lysosomal Pro-Xaa carboxypeptidase (Homo sapiens)                                     |
| S29                           |           | hepacivirin (hepatitis C virus)                                                       |
| S30                           |           | potyvirus P1 peptidase (plum pox virus)                                               |
| S31                           |           | pestivirus NS3 polyprotein peptidase (bovine viral diarrhoea virus 1)                 |
| S32                           |           | equine arteritis virus serine peptidase (equine arteritis virus)                      |
| S33                           |           | prolyl aminopeptidase (Neisseria gonorrhoeae)                                         |
| S37                           |           | PS-10 peptidase (Streptomyces lividans)                                               |

|                                      |           |                                                                                                 |
|--------------------------------------|-----------|-------------------------------------------------------------------------------------------------|
| S39                                  | S39A      | sobemovirus peptidase (cocksfoot mottle virus)                                                  |
|                                      | S39B      | luteovirus peptidase (potato leaf roll luteovirus)                                              |
| S41                                  | S41A      | C-terminal processing peptidase-1 (Escherichia coli)                                            |
|                                      | S41B      | tricorn core peptidase (Thermoplasma acidophilum)                                               |
| S45                                  |           | penicillin G acylase precursor (Escherichia coli)                                               |
| S46                                  |           | dipeptidyl-peptidase 7 (Porphyromonas gingivalis)                                               |
| S48                                  |           | HetR putative peptidase (Anabaena variabilis)                                                   |
| S49                                  | S49A      | signal peptide peptidase A (Escherichia coli)                                                   |
|                                      | S49B      | protein C (bacteriophage lambda)                                                                |
|                                      | S49C      | archaeal signal peptide peptidase 1 (Pyrococcus horikoshii)                                     |
| S50                                  |           | infectious pancreatic necrosis birnavirus Vp4 peptidase (infectious pancreatic necrosis virus)  |
| S51                                  |           | dipeptidase E (Escherichia coli)                                                                |
| S53                                  |           | sedolisin (Pseudomonas sp. 101)                                                                 |
| S54                                  |           | rhomboid-1 (Drosophila melanogaster)                                                            |
| S55                                  |           | SpoIVB peptidase (Bacillus subtilis)                                                            |
| S59                                  |           | nucleoporin 145 (Homo sapiens)                                                                  |
| S60                                  |           | lactoferrin (Homo sapiens)                                                                      |
| S62                                  |           | influenza A PA peptidase (Influenza A virus)                                                    |
| S64                                  |           | Ssy5 peptidase (Saccharomyces cerevisiae)                                                       |
| S65                                  |           | picornain-like cysteine peptidase (Breda virus)                                                 |
| S66                                  |           | murein tetrapeptidase LD-carboxypeptidase (Pseudomonas aeruginosa)                              |
| S68                                  |           | PIDD auto-processing protein unit 1 (Homo sapiens)                                              |
| S69                                  |           | Tellina virus 1 VP4 peptidase (Tellina virus 1)                                                 |
| S71                                  |           | MUC1 self-cleaving mucin (Homo sapiens)                                                         |
| S72                                  |           | dystroglycan (Homo sapiens)                                                                     |
| S73                                  |           | gpO peptidase (Enterobacteria phage P2)                                                         |
| S74                                  |           | Escherichia coli phage K1F endosialidase CIMCD self-cleaving protein (Enterobacteria phage K1F) |
| S75                                  |           | White bream virus serine peptidase (White bream virus)                                          |
| S77                                  |           | prohead peptidase gp21 (Enterobacteria phage T4)                                                |
| S78                                  |           | prohead peptidase (Enterobacteria phage HK97)                                                   |
| S79                                  |           | CARD8 self-cleaving protein (Homo sapiens)                                                      |
| S80                                  |           | prohead peptidase gp175 (Pseudomonas phage phiKZ)                                               |
| S81                                  |           | destabilase (Hirudo medicinalis)                                                                |
| Threonine (T) Peptidases             |           |                                                                                                 |
| FAMILY                               |           |                                                                                                 |
| T1                                   | SUBFAMILY | TYPE ENZYME                                                                                     |
|                                      | T1A       | archaeal proteasome, beta component (Thermoplasma acidophilum)                                  |
|                                      | T1B       | HslV component of HslUV peptidase (Escherichia coli)                                            |
| T2                                   |           | glycosylasparaginase precursor (Homo sapiens)                                                   |
| T3                                   |           | gamma-glutamyltransferase 1 (Escherichia coli)                                                  |
| T5                                   |           | ornithine acetyltransferase precursor (Saccharomyces cerevisiae)                                |
| T7                                   |           | CwpV self-cleaving threonine peptidase (Peptoclostridium difficile)                             |
| Peptidases of Unknown Catalytic Type |           |                                                                                                 |
| FAMILY                               |           |                                                                                                 |
| U32                                  | SUBFAMILY | TYPE ENZYME                                                                                     |
| U40                                  |           | collagenase (Porphyromonas gingivalis)                                                          |
| U49                                  |           | protein P5 murein endopeptidase (bacteriophage phi-6)                                           |
| U56                                  |           | Lit peptidase (Escherichia coli)                                                                |
| U57                                  |           | homomultimeric peptidase (Thermotoga maritima)                                                  |
| U62                                  |           | yabG protein (Bacillus subtilis)                                                                |
| U69                                  |           | microcin-processing peptidase 1 (Escherichia coli)                                              |
| U72                                  |           | AIDA-I self-cleaving autotransporter protein (Escherichia coli)                                 |
| U73                                  |           | Dop isopeptidase (Mycobacterium tuberculosis)                                                   |
|                                      |           | small protease (Pseudomonas aeruginosa)                                                         |

**Table S7**

| strain      | replicon    | CRISPR type | CRISPR sub-type | repeat number | repeat length | repeat sequence                       | avg. length of spacers | cas 1 | cas 3 | cas 9 | cas 10 |
|-------------|-------------|-------------|-----------------|---------------|---------------|---------------------------------------|------------------------|-------|-------|-------|--------|
| 778         | chromosome  | II          | II-A            | 7             | 34            | GTTTCAGAAGGATGTTAAATCAATTAGGTTAAGA    | 32                     | Y     |       | Y     |        |
| 866         | chromosome  | II          | II-A            | 59            | 36            | GTTTCAGAAGGATGTTAAATCAATTAGGTTAAGACT  | 30                     | Y     | Y     |       |        |
| 866         | chromosome  | III         | III-A           | 19            | 36            | GTTTCGTCTCCTATATTCGGAGATATGTTCTTACT   | 38                     | Y     |       |       | Y      |
| 01M14315    | chromosome  | II          | II-A            | 12            | 36            | GTTTCAGAAGTATGTTAAATCAATTAGGTTAAGACC  | 30                     | Y     |       | Y     |        |
| 01M14315    | chromosome  | III         | III-A           | 13            | 36            | GTTTCGTCTCCTATATTCGGAGATATGTTCTTACT   | 39                     | Y     |       |       | Y      |
| ACS116      | chromosome  | II          | II-A            | 17            | 36            | GTTTCAGAAGGATGTTAAATCAATTAGGTTAAGACT  | 29                     | Y     | Y     |       |        |
| ACS116      | chromosome  | III         | III-A           | 9             | 35            | TTTTCGTCTCCTATATTCGGAGATATGTTCTTACT   | 38                     | Y     |       |       |        |
| AH4231      | chromosome  | II          | II-A            | 60            | 36            | GTTTCAGAAGGATGTTAAATCAATTAGGTTAAGACT  | 30                     | Y     |       | Y     |        |
| AH4231      | chromosome  | III         | III-A           | 26            | 36            | GTTTCGTCTCCTATATTCGGAGATATGTTCTTACT   | 38                     | Y     |       |       | Y      |
| AH4331      | chromosome  | II          | II-A            | 60            | 36            | GTTTCAGAAGGATGTTAAATCAATTAGGTTAAGACT  | 30                     | Y     | Y     |       |        |
| AH4331      | chromosome  | III         | III-A           | 26            | 36            | GTTTCGTCTCCTATATTCGGAGATATGTTCTTACT   | 38                     | Y     |       |       | Y      |
| AH43324     | chromosome  | II          | II-A            | 28            | 36            | GTTTCAGAAGTATGTTAAATCAATTAGGTTAAGACC  | 30                     | Y     | Y     |       |        |
| AH43348     | chromosome  | II          | II-A            | 62            | 36            | GTTTCAGAAGGATGTTAAATCAATTAGGTTAAGACT  | 30                     | Y     |       | Y     |        |
| AH43348     | chromosome  | III         | III-A           | 31            | 36            | GTTTCGTCTCCTATATTCGGAGATATGTTCTTACT   | 38                     | Y     |       |       | Y      |
| ATCC11741   | chromosome  | III         | III-A           | 12            | 36            | GTTTCGTCTCCTATATTCGGAGATATGTTCTTACT   | 37                     | Y     |       |       | Y      |
| CCUG27530B  | chromosome  | II          | II-A            | 19            | 36            | GTTTCAGAAGTATGTTAAATCAATTAGGTTAAGACC  | 30                     | Y     |       | Y     |        |
| CCUG38008   | chromosome  | II          | II-A            | 29            | 36            | GTTTCAGAAGGATGTTAAATCAATTAGGTTAAGACC  | 30                     | Y     | Y     |       |        |
| CCUG44481   | NA          | NA          | NA              | 0             | 0             | NA                                    | 0                      |       |       |       |        |
| CCUG45735   | chromosome  | II          | II-A            | 40            | 36            | GTTTCAGAAGGATGTTAAATCAATTAGGTTAAGACT  | 30                     | Y     |       | Y     |        |
| CCUG45735   | chromosome  | III         | III-A           | 19            | 36            | GTTTCGTCTCCTATATTCGGAGATATGTTCTTACT   | 38                     | Y     |       |       | Y      |
| CCUG47171   | chromosome  | III         | III-A           | 11            | 36            | GTTTCGTCTCCTATATTCGGAGATATGTTCTTACT   | 37                     | Y     |       |       | Y      |
| CCUG47825   | chromosome  | II          | II-A            | 23            | 36            | GTTTCAGAAGTATGTTAAATCAATTAGGTTAAGACC  | 30                     | Y     |       |       |        |
| CCUG47825   | chromosome  | undefined   | undefined       | 12            | 37            | AGTTTTCGTCTCCTATATTCGGAGATATGTTCTTACT | 40                     |       |       | Y     |        |
| CCUG47826   | chromosome  | II          | II-A            | 22            | 36            | GTTTCAGAAGTATGTTAAATCAATTAGGTTAAGACC  | 30                     | Y     |       | Y     |        |
| CCUG47826   | chromosome  | III         | III-A           | 19            | 36            | GTTTCGTCTCCTATATTCGGAGATATGTTCTTACT   | 37                     | Y     |       |       | Y      |
| CECT5713    | chromosome  | II          | II-A            | 28            | 36            | GTTTCAGAAGTATGTTAAATCAATTAGGTTAAGACC  | 30                     | Y     |       | Y     |        |
| cp400       | chromosome  | III         | III-A           | 28            | 36            | GTTTCGTCTCCTATATTCGGAGATATGTTCTTACT   | 38                     | Y     |       |       | Y      |
| DSM18933    | NA          | NA          | NA              | 0             | 0             | NA                                    | 0                      |       |       |       |        |
| DSM20492    | chromosome  | II          | II-A            | 17            | 36            | GTTTCAGAAGTATGTTAAATCAATTAGGTTAAGACC  | 30                     | Y     |       | Y     |        |
| DSM20492    | chromosome  | III         | III-A           | 22            | 36            | GTTTCGTCTCCTATATTCGGAGATATGTTCTTACT   | 38                     | Y     |       |       | Y      |
| DSM20554    | chromosome  | III         | III-A           | 22            | 36            | GTTTCGTCTCCTATATTCGGAGATATGTTCTTACT   | 37                     | Y     |       |       | Y      |
| DSM20555    | chromosome  | III         | III-A           | 12            | 36            | GTTTCGTCTCCTATATTCGGAGATATGTTCTTACT   | 37                     | Y     |       |       | Y      |
| GJ24        | NA          | NA          | NA              | 0             | 0             | NA                                    | 0                      |       |       |       |        |
| gul1        | chromosome  | III         | III-A           | 12            | 36            | GTTTCGTCTCCTATATTCGGAGATATGTTCTTACT   | 37                     | Y     |       |       | Y      |
| gul2        | chromosome  | III         | III-A           | 12            | 36            | GTTTCGTCTCCTATATTCGGAGATATGTTCTTACT   | 37                     | Y     |       |       | Y      |
| JCM1040     | chromosome  | II          | II-A            | 15            | 36            | GTTTCAGAAGTATGTTAAATCAATTAGGTTAAGACC  | 29                     | Y     |       | Y     |        |
| JCM1040     | chromosome  | III         | III-A           | 18            | 36            | GTTTCGTCTCCTATATTCGGAGATATGTTCTTACT   | 38                     | Y     |       |       | Y      |
| JCM1042     | chromosome  | II          | II-A            | 19            | 36            | GTTTCAGAAGTATGTTAAATCAATTAGGTTAAGACC  | 30                     | Y     |       | Y     |        |
| JCM1044     | chromosome  | II          | II-A            | 19            | 36            | GTTTCAGAAGTATGTTAAATCAATTAGGTTAAGACC  | 30                     | Y     |       | Y     |        |
| JCM1045     | NA          | NA          | NA              | 0             | 0             | NA                                    | 0                      |       |       |       |        |
| JCM1046     | chromosome  | III         | III-A           | 27            | 36            | GTTTCGTCTCCTATATTCGGAGATATGTTCTTACT   | 38                     | Y     |       |       | Y      |
| JCM1047     | NA          | NA          | NA              | 0             | 0             | NA                                    | 0                      |       |       |       |        |
| JCM1230     | chromosome  | II          | II-A            | 40            | 36            | GTTTCAGAAGTATGTTAAATCAATTAGGTTAAGGCC  | 29                     | Y     |       | Y     |        |
| L21         | chromosome  | II          | II-A            | 26            | 36            | GTTTCAGAAGTATGTTAAATCAATTAGGTTAAGACC  | 29                     | Y     |       | Y     |        |
| L21         | chromosome  | III         | III-A           | 50            | 36            | GTTTCGTCTCCTATATTCGGAGATATGTTCTTACT   | 37                     | Y     |       |       | Y      |
| LMG14476    | NA          | NA          | NA              | 0             | 0             | NA                                    | 0                      |       |       |       |        |
| LMG14477    | NA          | NA          | NA              | 0             | 0             | NA                                    | 0                      |       |       |       |        |
| NCIMB702343 | chromosome  | II          | II-A            | 41            | 36            | GTTTCAGAAGTATGTTAAATCAATTAGGTTAAGACC  | 30                     | Y     |       | Y     |        |
| NCIMB702343 | chromosome  | undescribed | undescribed     | 11            | 24            | GTTTCAGAAGTATGTTAAATCAAT              | 41                     |       |       |       |        |
| NCIMB702343 | chromosome  | III         | III-A           | 20            | 36            | GTTTCGTCTCCTATATTCGGAGATATGTTCTTACT   | 37                     | Y     |       |       | Y      |
| NCIMB702343 | chromosome  | undescribed | undescribed     | 6             | 35            | GTTTCAGAAGTATGTTAAATCAATTAGGTTAAGACC  | 31                     |       |       |       |        |
| NCIMB8816   | chromosome  | II          | II-A            | 8             | 36            | GTTTCAGAAGTATGTTAAATCAATTAGGTTAAGACC  | 30                     | Y     |       | Y     |        |
| NCIMB8817   | chromosome  | II          | II-A            | 50            | 36            | GTTTCAGAAGTATGTTAAATCAATTAGGTTAAGACC  | 30                     | Y     |       | Y     |        |
| NCIMB8818   | chromosome  | II          | II-A            | 8             | 36            | GTTTCAGAAGTATGTTAAATCAATTAGGTTAAGACC  | 30                     | Y     |       | Y     |        |
| NIAS840     | chromosome  | undefined   | undefined       | 18            | 31            | TCAAGTTCCTAAGTAAAGCTTGAGTACAT         | 40                     |       |       |       |        |
| NIAS840     | chromosome  | III         | III-A           | 9             | 36            | GTTTCGTCTCCTATATTCGGAGATATGTTCTTACT   | 36                     | Y     |       |       | Y      |
| NIAS840     | megaplasmid | undefined   | undefined       | 5             | 37            | GCTTACACCTATGTCAATCACTAGGTCAGAACC     | 29                     |       |       |       |        |
| Ren         | chromosome  | II          | II-A            | 11            | 36            | GTTTCAGAAGTATGTTAAATCAATTAGGTTAAGACC  | 29                     | Y     |       |       | Y      |
| Ren         | chromosome  | III         | III-A           | 18            | 36            | GTTTCGTCTCCTATATTCGGAGATATGTTCTTACT   | 37                     |       |       |       |        |
| SMXD51      | chromosome  | II          | II-A            | 25            | 36            | GTTTCAGAAGTATGTTAAATCAATTAGGTTAAGACC  | 29                     | Y     |       | Y     |        |
| UCC118      | chromosome  | II          | II-A            | 28            | 36            | GTTTCAGAAGTATGTTAAATCAATTAGGTTAAGACC  | 30                     | Y     |       | Y     |        |

# Table S8

| query gene        | % identity | query coverage | e-value   | query gene length | functional annotation                                                                                                  |
|-------------------|------------|----------------|-----------|-------------------|------------------------------------------------------------------------------------------------------------------------|
| 01M14315_ORF_49   | 45         | 225            | 1.00E-62  | 236               | vanRM is a vanR variant found in the vanM gene cluster                                                                 |
| 01M14315_ORF_69   | 49         | 498            | 2.00E-170 | 493               | LsaA is an ABC efflux pump expressed in Enterococcus faecalis                                                          |
| 01M14315_ORF_212  | 48         | 233            | 2.00E-70  | 229               | vanRF is a vanR variant found in the vanF gene cluster                                                                 |
| 01M14315_ORF_611  | 46         | 418            | 8.00E-123 | 440               | Mycobacterium tuberculosis murA confers intrinsic resistance to fosfomycin                                             |
| 01M14315_ORF_653  | 69         | 396            | 0         | 395               | Sequence variants of Streptomyces cinnamomeus elongation factor Tu that confer resistance to elfamycin antibiotics     |
| 01M14315_ORF_936  | 45         | 648            | 0         | 772               | PBP1a is a penicillin-binding protein found in Streptococcus pneumoniae                                                |
| 01M14315_ORF_940  | 41         | 569            | 4.00E-147 | 578               | AdeC is the outer membrane factor of the AdeABC multidrug efflux complex                                               |
| 01M14315_ORF_1128 | 41         | 233            | 3.00E-54  | 233               | vanRE is a vanR variant found in the vanE gene cluster                                                                 |
| 01M14315_ORF_1278 | 62         | 61             | 2.00E-22  | 73                | VanU is a transcriptional activator of the vanG operon of vancomycin resistance genes                                  |
| 01M14315_ORF_1354 | 40         | 222            | 7.00E-47  | 224               | MacB is an ATP-binding cassette (ABC) transporter that exports macrolides with 14- or 15- membered lactones            |
| 01M14315_ORF_1416 | 44         | 222            | 4.00E-62  | 227               | MacB is an ATP-binding cassette (ABC) transporter that exports macrolides with 14- or 15- membered lactones            |
| 01M14315_ORF_1628 | 43         | 219            | 2.00E-53  | 233               | MacB is an ATP-binding cassette (ABC) transporter that exports macrolides with 14- or 15- membered lactones            |
| 778_ORF_53        | 45         | 225            | 1.00E-62  | 236               | vanRM is a vanR variant found in the vanM gene cluster                                                                 |
| 778_ORF_72        | 50         | 500            | 2.00E-172 | 493               | LsaA is an ABC efflux pump expressed in Enterococcus faecalis                                                          |
| 778_ORF_226       | 48         | 233            | 1.00E-70  | 229               | vanRF is a vanR variant found in the vanF gene cluster                                                                 |
| 778_ORF_512       | 46         | 418            | 1.00E-120 | 440               | Mycobacterium tuberculosis murA confers intrinsic resistance to fosfomycin                                             |
| 778_ORF_610       | 69         | 396            | 0         | 395               | Sequence variants of Streptomyces cinnamomeus elongation factor Tu that confer resistance to elfamycin antibiotics     |
| 778_ORF_828       | 40         | 573            | 2.00E-146 | 578               | AdeC is the outer membrane factor of the AdeABC multidrug efflux complex                                               |
| 778_ORF_832       | 45         | 648            | 0         | 772               | PBP1a is a penicillin-binding protein found in Streptococcus pneumoniae                                                |
| 778_ORF_1079      | 41         | 233            | 3.00E-54  | 233               | vanRE is a vanR variant found in the vanE gene cluster                                                                 |
| 778_ORF_1272      | 40         | 222            | 8.00E-47  | 224               | MacB is an ATP-binding cassette (ABC) transporter that exports macrolides with 14- or 15- membered lactones            |
| 778_ORF_1335      | 44         | 222            | 1.00E-61  | 227               | MacB is an ATP-binding cassette (ABC) transporter that exports macrolides with 14- or 15- membered lactones            |
| 778_ORF_1549      | 43         | 221            | 6.00E-56  | 233               | MacB is an ATP-binding cassette (ABC) transporter that exports macrolides with 14- or 15- membered lactones            |
| 866_ORF_51        | 45         | 225            | 1.00E-62  | 236               | vanRM is a vanR variant found in the vanM gene cluster                                                                 |
| 866_ORF_106       | 55         | 95             | 7.00E-31  | 99                | LsaA is an ABC efflux pump expressed in Enterococcus faecalis                                                          |
| 866_ORF_107       | 49         | 391            | 5.00E-131 | 387               | LsaA is an ABC efflux pump expressed in Enterococcus faecalis                                                          |
| 866_ORF_271       | 48         | 233            | 1.00E-70  | 229               | vanRF is a vanR variant found in the vanF gene cluster                                                                 |
| 866_ORF_642       | 46         | 418            | 1.00E-120 | 441               | Mycobacterium tuberculosis murA confers intrinsic resistance to fosfomycin                                             |
| 866_ORF_682       | 69         | 396            | 0         | 395               | Sequence variants of Streptomyces cinnamomeus elongation factor Tu that confer resistance to elfamycin antibiotics     |
| 866_ORF_913       | 40         | 583            | 9.00E-146 | 578               | AdeC is the outer membrane factor of the AdeABC multidrug efflux complex                                               |
| 866_ORF_917       | 45         | 648            | 0         | 772               | PBP1a is a penicillin-binding protein found in Streptococcus pneumoniae                                                |
| 866_ORF_1176      | 41         | 233            | 6.00E-54  | 233               | vanRE is a vanR variant found in the vanE gene cluster                                                                 |
| 866_ORF_1362      | 40         | 219            | 1.00E-46  | 224               | MacB is an ATP-binding cassette (ABC) transporter that exports macrolides with 14- or 15- membered lactones            |
| 866_ORF_1373      | 45         | 302            | 2.00E-80  | 302               | bcrA is an ABC transporter found in Bacillus licheniformis that confers bacitracin resistance                          |
| 866_ORF_1455      | 44         | 222            | 4.00E-62  | 227               | MacB is an ATP-binding cassette (ABC) transporter that exports macrolides with 14- or 15- membered lactones            |
| 866_ORF_1663      | 43         | 219            | 4.00E-53  | 233               | MacB is an ATP-binding cassette (ABC) transporter that exports macrolides with 14- or 15- membered lactones            |
| ACS116_ORF_52     | 45         | 225            | 1.00E-62  | 236               | vanRM is a vanR variant found in the vanM gene cluster                                                                 |
| ACS116_ORF_71     | 55         | 95             | 7.00E-31  | 99                | LsaA is an ABC efflux pump expressed in Enterococcus faecalis                                                          |
| ACS116_ORF_72     | 49         | 391            | 5.00E-131 | 387               | LsaA is an ABC efflux pump expressed in Enterococcus faecalis                                                          |
| ACS116_ORF_228    | 48         | 233            | 1.00E-70  | 229               | vanRF is a vanR variant found in the vanF gene cluster                                                                 |
| ACS116_ORF_651    | 46         | 418            | 1.00E-120 | 441               | Mycobacterium tuberculosis murA confers intrinsic resistance to fosfomycin                                             |
| ACS116_ORF_722    | 69         | 396            | 0         | 395               | Sequence variants of Streptomyces cinnamomeus elongation factor Tu that confer resistance to elfamycin antibiotics     |
| ACS116_ORF_1019   | 40         | 583            | 9.00E-146 | 578               | AdeC is the outer membrane factor of the AdeABC multidrug efflux complex                                               |
| ACS116_ORF_1023   | 45         | 648            | 0         | 772               | PBP1a is a penicillin-binding protein found in Streptococcus pneumoniae                                                |
| ACS116_ORF_1271   | 40         | 187            | 3.00E-41  | 191               | vanRA, also known as vanR, is a vanR variant found in the vanA gene cluster                                            |
| ACS116_ORF_1293   | 40         | 223            | 2.00E-49  | 223               | vanRE is a vanR variant found in the vanE gene cluster                                                                 |
| ACS116_ORF_1328   | 45         | 286            | 1.00E-80  | 299               | MprF is an integral membrane protein that modifies the negatively-charged phosphatidylglycerol on the membrane surface |
| ACS116_ORF_1482   | 40         | 219            | 1.00E-46  | 224               | MacB is an ATP-binding cassette (ABC) transporter that exports macrolides with 14- or 15- membered lactones            |
| ACS116_ORF_1493   | 45         | 302            | 2.00E-80  | 302               | bcrA is an ABC transporter found in Bacillus licheniformis that confers bacitracin resistance                          |
| ACS116_ORF_1575   | 44         | 222            | 4.00E-62  | 227               | MacB is an ATP-binding cassette (ABC) transporter that exports macrolides with 14- or 15- membered lactones            |
| ACS116_ORF_1792   | 43         | 219            | 4.00E-53  | 233               | MacB is an ATP-binding cassette (ABC) transporter that exports macrolides with 14- or 15- membered lactones            |
| AH4231_ORF_45     | 45         | 225            | 1.00E-62  | 236               | vanRM is a vanR variant found in the vanM gene cluster                                                                 |
| AH4231_ORF_65     | 55         | 95             | 7.00E-31  | 99                | LsaA is an ABC efflux pump expressed in Enterococcus faecalis                                                          |
| AH4231_ORF_66     | 49         | 391            | 5.00E-131 | 387               | LsaA is an ABC efflux pump expressed in Enterococcus faecalis                                                          |
| AH4231_ORF_231    | 48         | 233            | 1.00E-70  | 229               | vanRF is a vanR variant found in the vanF gene cluster                                                                 |
| AH4231_ORF_639    | 46         | 418            | 1.00E-120 | 441               | Mycobacterium tuberculosis murA confers intrinsic resistance to fosfomycin                                             |
| AH4231_ORF_680    | 69         | 396            | 0         | 395               | Sequence variants of Streptomyces cinnamomeus elongation factor Tu that confer resistance to elfamycin antibiotics     |
| AH4231_ORF_1023   | 40         | 583            | 9.00E-146 | 578               | AdeC is the outer membrane factor of the AdeABC multidrug efflux complex                                               |
| AH4231_ORF_1027   | 45         | 648            | 0         | 772               | PBP1a is a penicillin-binding protein found in Streptococcus pneumoniae                                                |
| AH4231_ORF_1288   | 41         | 233            | 6.00E-54  | 233               | vanRE is a vanR variant found in the vanE gene cluster                                                                 |
| AH4231_ORF_1471   | 40         | 219            | 1.00E-46  | 224               | MacB is an ATP-binding cassette (ABC) transporter that exports macrolides with 14- or 15- membered lactones            |
| AH4231_ORF_1482   | 45         | 302            | 2.00E-80  | 302               | bcrA is an ABC transporter found in Bacillus licheniformis that confers bacitracin resistance                          |
| AH4231_ORF_1564   | 44         | 222            | 4.00E-62  | 227               | MacB is an ATP-binding cassette (ABC) transporter that exports macrolides with 14- or 15- membered lactones            |
| AH4231_ORF_1777   | 43         | 219            | 4.00E-53  | 233               | MacB is an ATP-binding cassette (ABC) transporter that exports macrolides with 14- or 15- membered lactones            |
| AH4231_ORF_1862   | 40         | 227            | 1.00E-54  | 233               | vanRM is a vanR variant found in the vanM gene cluster                                                                 |
| AH4331_ORF_45     | 45         | 225            | 1.00E-62  | 236               | vanRM is a vanR variant found in the vanM gene cluster                                                                 |
| AH4331_ORF_63     | 55         | 95             | 7.00E-31  | 99                | LsaA is an ABC efflux pump expressed in Enterococcus faecalis                                                          |
| AH4331_ORF_64     | 49         | 391            | 5.00E-131 | 387               | LsaA is an ABC efflux pump expressed in Enterococcus faecalis                                                          |
| AH4331_ORF_230    | 48         | 233            | 1.00E-70  | 229               | vanRF is a vanR variant found in the vanF gene cluster                                                                 |
| AH4331_ORF_647    | 46         | 418            | 1.00E-120 | 441               | Mycobacterium tuberculosis murA confers intrinsic resistance to fosfomycin                                             |
| AH4331_ORF_687    | 69         | 396            | 0         | 395               | Sequence variants of Streptomyces cinnamomeus elongation factor Tu that confer resistance to elfamycin antibiotics     |
| AH4331_ORF_994    | 40         | 583            | 9.00E-146 | 578               | AdeC is the outer membrane factor of the AdeABC multidrug efflux complex                                               |
| AH4331_ORF_998    | 45         | 648            | 0         | 772               | PBP1a is a penicillin-binding protein found in Streptococcus pneumoniae                                                |
| AH4331_ORF_1263   | 41         | 233            | 6.00E-54  | 233               | vanRE is a vanR variant found in the vanE gene cluster                                                                 |
| AH4331_ORF_1446   | 40         | 219            | 1.00E-46  | 224               | MacB is an ATP-binding cassette (ABC) transporter that exports macrolides with 14- or 15- membered lactones            |
| AH4331_ORF_1457   | 45         | 302            | 2.00E-80  | 302               | bcrA is an ABC transporter found in Bacillus licheniformis that confers bacitracin resistance                          |
| AH4331_ORF_1539   | 44         | 222            | 4.00E-62  | 227               | MacB is an ATP-binding cassette (ABC) transporter that exports macrolides with 14- or 15- membered lactones            |
| AH4331_ORF_1752   | 43         | 219            | 4.00E-53  | 233               | MacB is an ATP-binding cassette (ABC) transporter that exports macrolides with 14- or 15- membered lactones            |
| AH4331_ORF_1832   | 40         | 227            | 1.00E-54  | 233               | vanRM is a vanR variant found in the vanM gene cluster                                                                 |
| AH43324_ORF_52    | 45         | 225            | 1.00E-62  | 236               | vanRM is a vanR variant found in the vanM gene cluster                                                                 |
| AH43324_ORF_70    | 50         | 498            | 3.00E-171 | 493               | LsaA is an ABC efflux pump expressed in Enterococcus faecalis                                                          |
| AH43324_ORF_231   | 48         | 228            | 2.00E-70  | 229               | vanRF is a vanR variant found in the vanF gene cluster                                                                 |
| AH43324_ORF_630   | 46         | 418            | 2.00E-121 | 441               | Mycobacterium tuberculosis murA confers intrinsic resistance to fosfomycin                                             |
| AH43324_ORF_670   | 69         | 396            | 0         | 395               | Sequence variants of Streptomyces cinnamomeus elongation factor Tu that confer resistance to elfamycin antibiotics     |
| AH43324_ORF_969   | 40         | 583            | 1.00E-145 | 578               | AdeC is the outer membrane factor of the AdeABC multidrug efflux complex                                               |
| AH43324_ORF_973   | 45         | 648            | 0         | 772               | PBP1a is a penicillin-binding protein found in Streptococcus pneumoniae                                                |
| AH43324_ORF_1227  | 41         | 233            | 4.00E-54  | 233               | vanRE is a vanR variant found in the vanE gene cluster                                                                 |
| AH43324_ORF_1280  | 40         | 400            | 2.00E-90  | 415               | MprF is an integral membrane protein that modifies the negatively-charged phosphatidylglycerol on the membrane surface |
| AH43324_ORF_1428  | 40         | 222            | 7.00E-47  | 224               | MacB is an ATP-binding cassette (ABC) transporter that exports macrolides with 14- or 15- membered lactones            |
| AH43324_ORF_1439  | 45         | 305            | 1.00E-79  | 302               | bcrA is an ABC transporter found in Bacillus licheniformis that confers bacitracin resistance                          |
| AH43324_ORF_1522  | 44         | 222            | 1.00E-61  | 227               | MacB is an ATP-binding cassette (ABC) transporter that exports macrolides with 14- or 15- membered lactones            |
| AH43324_ORF_1765  | 43         | 219            | 5.00E-53  | 233               | MacB is an ATP-binding cassette (ABC) transporter that exports macrolides with 14- or 15- membered lactones            |
| AH43348_ORF_45    | 45         | 225            | 1.00E-62  | 236               | vanRM is a vanR variant found in the vanM gene cluster                                                                 |
| AH43348_ORF_64    | 55         | 95             | 7.00E-31  | 99                | LsaA is an ABC efflux pump expressed in Enterococcus faecalis                                                          |
| AH43348_ORF_65    | 49         | 391            | 5.00E-131 | 387               | LsaA is an ABC efflux pump expressed in Enterococcus faecalis                                                          |
| AH43348_ORF_232   | 48         | 233            | 1.00E-70  | 229               | vanRF is a vanR variant found in the vanF gene cluster                                                                 |
| AH43348_ORF_640   | 46         | 418            | 1.00E-120 | 441               | Mycobacterium tuberculosis murA confers intrinsic resistance to fosfomycin                                             |
| AH43348_ORF_680   | 69         | 396            | 0         | 395               | Sequence variants of Streptomyces cinnamomeus elongation factor Tu that confer resistance to elfamycin antibiotics     |
| AH43348_ORF_992   | 40         | 583            | 9.00E-146 | 578               | AdeC is the outer membrane factor of the AdeABC multidrug efflux complex                                               |
| AH43348_ORF_996   | 45         | 648            | 0         | 772               | PBP1a is a penicillin-binding protein found in Streptococcus pneumoniae                                                |
| AH43348_ORF_1259  | 41         | 233            | 6.00E-54  | 233               | vanRE is a vanR variant found in the vanE gene cluster                                                                 |
| AH43348_ORF_1447  | 40         | 219            | 1.00E-46  | 224               | MacB is an ATP-binding cassette (ABC) transporter that exports macrolides with 14- or 15- membered lactones            |
| AH43348_ORF_1458  | 45         | 302            | 2.00E-80  | 302               | bcrA is an ABC transporter found in Bacillus licheniformis that confers bacitracin resistance                          |
| AH43348_ORF_1539  | 44         | 222            | 4.00E-62  | 227               | MacB is an ATP-binding cassette (ABC) transporter that exports macrolides with 14- or 15- membered lactones            |
| AH43348_ORF_1755  | 43         | 219            | 4.00E-53  | 233               | MacB is an ATP-binding cassette (ABC) transporter that exports macrolides with 14- or 15- membered lactones            |
| ATCC11741_ORF_54  | 45         | 225            | 1.00E-62  | 236               | vanRM is a vanR variant found in the vanM gene cluster                                                                 |
| ATCC11741_ORF_71  | 50         | 498            | 3.00E-172 | 493               | LsaA is an ABC efflux pump expressed in Enterococcus faecalis                                                          |
| ATCC11741_ORF_216 | 48         | 233            | 1.00E-70  | 229               | vanRF is a vanR variant found in the vanF gene cluster                                                                 |



|                     |     |     |           |     |                                                                                                                    |
|---------------------|-----|-----|-----------|-----|--------------------------------------------------------------------------------------------------------------------|
| ATCC11741_ORF_559   | 46  | 418 | 2.00E-121 | 441 | Mycobacterium tuberculosis murA confers intrinsic resistance to fosfomycin                                         |
| ATCC11741_ORF_600   | 69  | 396 | 0         | 395 | Sequence variants of Streptomyces cinnamomeus elongation factor Tu that confer resistance to elfamycin antibiotics |
| ATCC11741_ORF_824   | 41  | 573 | 9.00E-147 | 578 | AdeC is the outer membrane factor of the AdeABC multidrug efflux complex                                           |
| ATCC11741_ORF_828   | 45  | 648 | 0         | 772 | PBP1a is a penicillin-binding protein found in Streptococcus pneumoniae                                            |
| ATCC11741_ORF_1079  | 41  | 233 | 4.00E-54  | 233 | vanRE is a vanR variant found in the vanE gene cluster                                                             |
| ATCC11741_ORF_1264  | 40  | 222 | 2.00E-46  | 224 | MacB is an ATP-binding cassette (ABC) transporter that exports macrolides with 14- or 15- membered lactones        |
| ATCC11741_ORF_1327  | 44  | 222 | 2.00E-61  | 227 | MacB is an ATP-binding cassette (ABC) transporter that exports macrolides with 14- or 15- membered lactones        |
| ATCC11741_ORF_1544  | 43  | 221 | 1.00E-56  | 233 | MacB is an ATP-binding cassette (ABC) transporter that exports macrolides with 14- or 15- membered lactones        |
| CCUG27530B_ORF_53   | 45  | 225 | 1.00E-62  | 236 | vanRM is a vanR variant found in the vanM gene cluster                                                             |
| CCUG27530B_ORF_73   | 49  | 500 | 1.00E-171 | 493 | LsaA is an ABC efflux pump expressed in Enterococcus faecalis                                                      |
| CCUG27530B_ORF_328  | 48  | 233 | 1.00E-70  | 229 | vanRF is a vanR variant found in the vanF gene cluster                                                             |
| CCUG27530B_ORF_506  | 46  | 418 | 2.00E-121 | 441 | Mycobacterium tuberculosis murA confers intrinsic resistance to fosfomycin                                         |
| CCUG27530B_ORF_546  | 69  | 396 | 0         | 395 | Sequence variants of Streptomyces cinnamomeus elongation factor Tu that confer resistance to elfamycin antibiotics |
| CCUG27530B_ORF_777  | 40  | 583 | 4.00E-146 | 578 | AdeC is the outer membrane factor of the AdeABC multidrug efflux complex                                           |
| CCUG27530B_ORF_782  | 45  | 648 | 0         | 772 | PBP1a is a penicillin-binding protein found in Streptococcus pneumoniae                                            |
| CCUG27530B_ORF_1031 | 41  | 233 | 3.00E-54  | 233 | vanRE is a vanR variant found in the vanE gene cluster                                                             |
| CCUG27530B_ORF_1212 | 40  | 222 | 7.00E-47  | 224 | MacB is an ATP-binding cassette (ABC) transporter that exports macrolides with 14- or 15- membered lactones        |
| CCUG27530B_ORF_1275 | 44  | 222 | 1.00E-61  | 227 | MacB is an ATP-binding cassette (ABC) transporter that exports macrolides with 14- or 15- membered lactones        |
| CCUG27530B_ORF_1501 | 43  | 221 | 2.00E-56  | 244 | MacB is an ATP-binding cassette (ABC) transporter that exports macrolides with 14- or 15- membered lactones        |
| CCUG38008_ORF_55    | 45  | 225 | 1.00E-62  | 236 | vanRM is a vanR variant found in the vanM gene cluster                                                             |
| CCUG38008_ORF_70    | 49  | 500 | 2.00E-171 | 493 | LsaA is an ABC efflux pump expressed in Enterococcus faecalis                                                      |
| CCUG38008_ORF_221   | 48  | 233 | 1.00E-70  | 229 | vanRF is a vanR variant found in the vanF gene cluster                                                             |
| CCUG38008_ORF_546   | 46  | 418 | 2.00E-121 | 441 | Mycobacterium tuberculosis murA confers intrinsic resistance to fosfomycin                                         |
| CCUG38008_ORF_586   | 69  | 396 | 0         | 395 | Sequence variants of Streptomyces cinnamomeus elongation factor Tu that confer resistance to elfamycin antibiotics |
| CCUG38008_ORF_885   | 40  | 583 | 9.00E-147 | 578 | AdeC is the outer membrane factor of the AdeABC multidrug efflux complex                                           |
| CCUG38008_ORF_889   | 45  | 648 | 0         | 772 | PBP1a is a penicillin-binding protein found in Streptococcus pneumoniae                                            |
| CCUG38008_ORF_1140  | 41  | 233 | 3.00E-54  | 233 | vanRE is a vanR variant found in the vanE gene cluster                                                             |
| CCUG38008_ORF_1286  | 60  | 63  | 1.00E-22  | 67  | VanU is a transcriptional activator of the vanG operon of vancomycin resistance genes                              |
| CCUG38008_ORF_1389  | 44  | 222 | 2.00E-61  | 227 | MacB is an ATP-binding cassette (ABC) transporter that exports macrolides with 14- or 15- membered lactones        |
| CCUG38008_ORF_1606  | 43  | 221 | 2.00E-56  | 244 | MacB is an ATP-binding cassette (ABC) transporter that exports macrolides with 14- or 15- membered lactones        |
| CCUG38008_ORF_1669  | 40  | 227 | 2.00E-54  | 233 | vanRM is a vanR variant found in the vanM gene cluster                                                             |
| CCUG44481_ORF_44    | 45  | 225 | 1.00E-62  | 236 | vanRM is a vanR variant found in the vanM gene cluster                                                             |
| CCUG44481_ORF_96    | 50  | 498 | 2.00E-172 | 490 | LsaA is an ABC efflux pump expressed in Enterococcus faecalis                                                      |
| CCUG44481_ORF_246   | 48  | 233 | 1.00E-70  | 229 | vanRF is a vanR variant found in the vanF gene cluster                                                             |
| CCUG44481_ORF_661   | 46  | 418 | 2.00E-121 | 441 | Mycobacterium tuberculosis murA confers intrinsic resistance to fosfomycin                                         |
| CCUG44481_ORF_702   | 69  | 396 | 0         | 395 | Sequence variants of Streptomyces cinnamomeus elongation factor Tu that confer resistance to elfamycin antibiotics |
| CCUG44481_ORF_911   | 40  | 583 | 7.00E-146 | 578 | AdeC is the outer membrane factor of the AdeABC multidrug efflux complex                                           |
| CCUG44481_ORF_915   | 45  | 648 | 0         | 772 | PBP1a is a penicillin-binding protein found in Streptococcus pneumoniae                                            |
| CCUG44481_ORF_1148  | 41  | 233 | 1.00E-53  | 233 | vanRE is a vanR variant found in the vanE gene cluster                                                             |
| CCUG44481_ORF_1338  | 40  | 222 | 7.00E-47  | 224 | MacB is an ATP-binding cassette (ABC) transporter that exports macrolides with 14- or 15- membered lactones        |
| CCUG44481_ORF_1401  | 44  | 222 | 1.00E-61  | 227 | MacB is an ATP-binding cassette (ABC) transporter that exports macrolides with 14- or 15- membered lactones        |
| CCUG44481_ORF_1700  | 58  | 67  | 8.00E-24  | 84  | VanU is a transcriptional activator of the vanG operon of vancomycin resistance genes                              |
| CCUG44481_ORF_1782  | 99  | 458 | 0         | 458 | TetI is a tetracycline efflux protein found in many species of Gram-negative and Gram-positive bacteria            |
| CCUG44481_ORF_1931  | 90  | 641 | 0         | 646 | TetM is a ribosomal protection protein that confers tetracycline resistance                                        |
| CCUG44481_ORF_1937  | 99  | 215 | 4.00E-156 | 215 | cat is used to describe many variants of the chloramphenicol acetyltransferase gene in a range of organisms        |
| CCUG44481_ORF_1974  | 51  | 306 | 8.00E-109 | 326 | bcrA is an ABC transporter found in Bacillus licheniformis that confers bacitracin resistance                      |
| CCUG45735_ORF_51    | 45  | 225 | 1.00E-62  | 236 | vanRM is a vanR variant found in the vanM gene cluster                                                             |
| CCUG45735_ORF_70    | 55  | 95  | 7.00E-31  | 99  | LsaA is an ABC efflux pump expressed in Enterococcus faecalis                                                      |
| CCUG45735_ORF_71    | 49  | 391 | 5.00E-131 | 387 | LsaA is an ABC efflux pump expressed in Enterococcus faecalis                                                      |
| CCUG45735_ORF_227   | 48  | 233 | 1.00E-70  | 229 | vanRF is a vanR variant found in the vanF gene cluster                                                             |
| CCUG45735_ORF_644   | 46  | 418 | 1.00E-120 | 441 | Mycobacterium tuberculosis murA confers intrinsic resistance to fosfomycin                                         |
| CCUG45735_ORF_685   | 69  | 396 | 0         | 395 | Sequence variants of Streptomyces cinnamomeus elongation factor Tu that confer resistance to elfamycin antibiotics |
| CCUG45735_ORF_918   | 40  | 583 | 9.00E-146 | 578 | AdeC is the outer membrane factor of the AdeABC multidrug efflux complex                                           |
| CCUG45735_ORF_922   | 45  | 648 | 0         | 772 | PBP1a is a penicillin-binding protein found in Streptococcus pneumoniae                                            |
| CCUG45735_ORF_1183  | 41  | 233 | 6.00E-54  | 233 | vanRE is a vanR variant found in the vanE gene cluster                                                             |
| CCUG45735_ORF_1365  | 40  | 219 | 1.00E-46  | 224 | MacB is an ATP-binding cassette (ABC) transporter that exports macrolides with 14- or 15- membered lactones        |
| CCUG45735_ORF_1376  | 45  | 302 | 2.00E-80  | 302 | bcrA is an ABC transporter found in Bacillus licheniformis that confers bacitracin resistance                      |
| CCUG45735_ORF_1461  | 44  | 222 | 4.00E-62  | 227 | MacB is an ATP-binding cassette (ABC) transporter that exports macrolides with 14- or 15- membered lactones        |
| CCUG45735_ORF_1681  | 43  | 219 | 4.00E-53  | 233 | MacB is an ATP-binding cassette (ABC) transporter that exports macrolides with 14- or 15- membered lactones        |
| CCUG45735_ORF_1865  | 58  | 67  | 8.00E-24  | 84  | VanU is a transcriptional activator of the vanG operon of vancomycin resistance genes                              |
| CCUG47171_ORF_51    | 45  | 225 | 1.00E-62  | 236 | vanRM is a vanR variant found in the vanM gene cluster                                                             |
| CCUG47171_ORF_73    | 49  | 498 | 2.00E-171 | 493 | LsaA is an ABC efflux pump expressed in Enterococcus faecalis                                                      |
| CCUG47171_ORF_217   | 48  | 233 | 1.00E-70  | 229 | vanRF is a vanR variant found in the vanF gene cluster                                                             |
| CCUG47171_ORF_594   | 46  | 418 | 2.00E-121 | 441 | Mycobacterium tuberculosis murA confers intrinsic resistance to fosfomycin                                         |
| CCUG47171_ORF_634   | 69  | 396 | 0         | 395 | Sequence variants of Streptomyces cinnamomeus elongation factor Tu that confer resistance to elfamycin antibiotics |
| CCUG47171_ORF_889   | 40  | 583 | 2.00E-145 | 578 | AdeC is the outer membrane factor of the AdeABC multidrug efflux complex                                           |
| CCUG47171_ORF_893   | 45  | 648 | 0         | 772 | PBP1a is a penicillin-binding protein found in Streptococcus pneumoniae                                            |
| CCUG47171_ORF_1141  | 41  | 233 | 3.00E-54  | 233 | vanRE is a vanR variant found in the vanE gene cluster                                                             |
| CCUG47171_ORF_1371  | 40  | 222 | 7.00E-47  | 224 | MacB is an ATP-binding cassette (ABC) transporter that exports macrolides with 14- or 15- membered lactones        |
| CCUG47171_ORF_1434  | 44  | 222 | 4.00E-62  | 227 | MacB is an ATP-binding cassette (ABC) transporter that exports macrolides with 14- or 15- membered lactones        |
| CCUG47171_ORF_1663  | 44  | 204 | 3.00E-51  | 219 | MacB is an ATP-binding cassette (ABC) transporter that exports macrolides with 14- or 15- membered lactones        |
| CCUG47171_ORF_1918  | 58  | 67  | 8.00E-24  | 84  | VanU is a transcriptional activator of the vanG operon of vancomycin resistance genes                              |
| CCUG47171_ORF_2091  | 41  | 231 | 2.00E-53  | 229 | MacB is an ATP-binding cassette (ABC) transporter that exports macrolides with 14- or 15- membered lactones        |
| CCUG47825_ORF_286   | 41  | 136 | 4.00E-26  | 154 | MacB is an ATP-binding cassette (ABC) transporter that exports macrolides with 14- or 15- membered lactones        |
| CCUG47825_ORF_287   | 43  | 81  | 1.00E-20  | 102 | MacB is an ATP-binding cassette (ABC) transporter that exports macrolides with 14- or 15- membered lactones        |
| CCUG47825_ORF_505   | 49  | 90  | 4.00E-21  | 94  | MacB is an ATP-binding cassette (ABC) transporter that exports macrolides with 14- or 15- membered lactones        |
| CCUG47825_ORF_506   | 47  | 122 | 3.00E-30  | 128 | MacB is an ATP-binding cassette (ABC) transporter that exports macrolides with 14- or 15- membered lactones        |
| CCUG47825_ORF_570   | 40  | 222 | 7.00E-47  | 224 | MacB is an ATP-binding cassette (ABC) transporter that exports macrolides with 14- or 15- membered lactones        |
| CCUG47825_ORF_773   | 46  | 418 | 1.00E-122 | 438 | Mycobacterium tuberculosis murA confers intrinsic resistance to fosfomycin                                         |
| CCUG47825_ORF_817   | 395 | 396 | 0         | 395 | Sequence variants of Streptomyces cinnamomeus elongation factor Tu that confer resistance to elfamycin antibiotics |
| CCUG47825_ORF_1076  | 41  | 493 | 7.00E-129 | 494 | AdeC is the outer membrane factor of the AdeABC multidrug efflux complex                                           |
| CCUG47825_ORF_1080  | 45  | 648 | 0         | 772 | PBP1a is a penicillin-binding protein found in Streptococcus pneumoniae                                            |
| CCUG47825_ORF_1351  | 45  | 225 | 1.00E-62  | 248 | vanRM is a vanR variant found in the vanM gene cluster                                                             |
| CCUG47825_ORF_1369  | 50  | 498 | 7.00E-174 | 493 | LsaA is an ABC efflux pump expressed in Enterococcus faecalis                                                      |
| CCUG47825_ORF_1449  | 41  | 233 | 3.00E-54  | 233 | vanRE is a vanR variant found in the vanE gene cluster                                                             |
| CCUG47825_ORF_1451  | 44  | 77  | 0.00E+00  | 93  | vanSL is a vanS variant found in the vanL gene cluster                                                             |
| CCUG47825_ORF_1688  | 40  | 164 | 3.00E-32  | 172 | A type III ABC transporter, identified on the novobiocin biosynthetic gene cluster                                 |
| CCUG47825_ORF_1696  | 48  | 233 | 1.00E-70  | 229 | vanRF is a vanR variant found in the vanF gene cluster                                                             |
| CCUG47825_ORF_1830  | 58  | 67  | 8.00E-24  | 84  | VanU is a transcriptional activator of the vanG operon of vancomycin resistance genes                              |
| CCUG47826_ORF_51    | 45  | 225 | 1.00E-62  | 236 | vanRM is a vanR variant found in the vanM gene cluster                                                             |
| CCUG47826_ORF_68    | 50  | 498 | 7.00E-174 | 493 | LsaA is an ABC efflux pump expressed in Enterococcus faecalis                                                      |
| CCUG47826_ORF_234   | 48  | 233 | 1.00E-70  | 229 | vanRF is a vanR variant found in the vanF gene cluster                                                             |
| CCUG47826_ORF_242   | 40  | 164 | 3.00E-32  | 172 | A type III ABC transporter, identified on the novobiocin biosynthetic gene cluster                                 |
| CCUG47826_ORF_556   | 46  | 418 | 8.00E-123 | 440 | Mycobacterium tuberculosis murA confers intrinsic resistance to fosfomycin                                         |
| CCUG47826_ORF_596   | 69  | 396 | 0         | 395 | Sequence variants of Streptomyces cinnamomeus elongation factor Tu that confer resistance to elfamycin antibiotics |
| CCUG47826_ORF_907   | 41  | 569 | 3.00E-147 | 578 | AdeC is the outer membrane factor of the AdeABC multidrug efflux complex                                           |
| CCUG47826_ORF_911   | 45  | 648 | 0         | 772 | PBP1a is a penicillin-binding protein found in Streptococcus pneumoniae                                            |
| CCUG47826_ORF_1164  | 41  | 233 | 3.00E-54  | 233 | vanRE is a vanR variant found in the vanE gene cluster                                                             |
| CCUG47826_ORF_1452  | 40  | 222 | 7.00E-47  | 224 | MacB is an ATP-binding cassette (ABC) transporter that exports macrolides with 14- or 15- membered lactones        |
| CCUG47826_ORF_1514  | 43  | 222 | 3.00E-60  | 227 | MacB is an ATP-binding cassette (ABC) transporter that exports macrolides with 14- or 15- membered lactones        |
| CCUG47826_ORF_1724  | 43  | 219 | 5.00E-53  | 233 | MacB is an ATP-binding cassette (ABC) transporter that exports macrolides with 14- or 15- membered lactones        |
| CCUG47826_ORF_1842  | 58  | 67  | 8.00E-24  | 84  | VanU is a transcriptional activator of the vanG operon of vancomycin resistance genes                              |
| CECT5713_ORF_44     | 45  | 225 | 1.00E-62  | 236 | vanRM is a vanR variant found in the vanM gene cluster                                                             |
| CECT5713_ORF_64     | 50  | 500 | 6.00E-172 | 493 | LsaA is an ABC efflux pump expressed in Enterococcus faecalis                                                      |
| CECT5713_ORF_249    | 48  | 231 | 4.00E-70  | 229 | vanRF is a vanR variant found in the vanF gene cluster                                                             |
| CECT5713_ORF_699    | 46  | 418 | 2.00E-121 | 441 | Mycobacterium tuberculosis murA confers intrinsic resistance to fosfomycin                                         |
| CECT5713_ORF_742    | 69  | 396 | 0         | 395 | Sequence variants of Streptomyces cinnamomeus elongation factor Tu that confer resistance to elfamycin antibiotics |
| CECT5713_ORF_1052   | 41  | 127 | 3.00E-28  | 136 | AdeC is the outer membrane factor of the AdeABC multidrug efflux complex                                           |
| CECT5713_ORF_1053   | 45  | 350 | 3.00E-102 | 412 | AdeC is the outer membrane factor of the AdeABC multidrug efflux complex                                           |

|                   |    |     |           |     |                                                                                                                    |
|-------------------|----|-----|-----------|-----|--------------------------------------------------------------------------------------------------------------------|
| CECT5713_ORF_1057 | 45 | 648 | 0         | 772 | PBP1a is a penicillin-binding protein found in Streptococcus pneumoniae                                            |
| CECT5713_ORF_1328 | 41 | 233 | 3.00E-54  | 233 | vanRE is a vanR variant found in the vanE gene cluster                                                             |
| CECT5713_ORF_1549 | 40 | 222 | 7.00E-47  | 224 | MacB is an ATP-binding cassette (ABC) transporter that exports macrolides with 14- or 15- membered lactones        |
| CECT5713_ORF_1563 | 45 | 305 | 1.00E-79  | 302 | bcrA is an ABC transporter found in Bacillus licheniformis that confers bacitracin resistance                      |
| CECT5713_ORF_1647 | 44 | 222 | 2.00E-61  | 227 | MacB is an ATP-binding cassette (ABC) transporter that exports macrolides with 14- or 15- membered lactones        |
| CECT5713_ORF_1903 | 43 | 219 | 5.00E-53  | 233 | MacB is an ATP-binding cassette (ABC) transporter that exports macrolides with 14- or 15- membered lactones        |
| cp400_ORF_61      | 45 | 225 | 1.00E-62  | 236 | vanRM is a vanR variant found in the vanM gene cluster                                                             |
| cp400_ORF_244     | 48 | 233 | 1.00E-70  | 229 | vanRF is a vanR variant found in the vanF gene cluster                                                             |
| cp400_ORF_747     | 46 | 418 | 2.00E-121 | 441 | Mycobacterium tuberculosis murA confers intrinsic resistance to fosfomicin                                         |
| cp400_ORF_789     | 69 | 396 | 0         | 395 | Sequence variants of Streptomyces cinnamomeus elongation factor Tu that confer resistance to elfamycin antibiotics |
| cp400_ORF_799     | 40 | 583 | 2.00E-147 | 578 | AdeC is the outer membrane factor of the AdeABC multidrug efflux complex                                           |
| cp400_ORF_803     | 45 | 648 | 0         | 772 | PBP1a is a penicillin-binding protein found in Streptococcus pneumoniae                                            |
| cp400_ORF_1294    | 41 | 233 | 3.00E-54  | 233 | vanRE is a vanR variant found in the vanE gene cluster                                                             |
| cp400_ORF_1551    | 40 | 222 | 1.00E-45  | 224 | MacB is an ATP-binding cassette (ABC) transporter that exports macrolides with 14- or 15- membered lactones        |
| cp400_ORF_1615    | 44 | 222 | 4.00E-62  | 227 | MacB is an ATP-binding cassette (ABC) transporter that exports macrolides with 14- or 15- membered lactones        |
| cp400_ORF_2079    | 60 | 60  | 2.00E-20  | 71  | VanU is a transcriptional activator of the vanG operon of vancomycin resistance genes                              |
| cp400_ORF_2106    | 50 | 498 | 8.00E-168 | 493 | LsaA is an ABC efflux pump expressed in Enterococcus faecalis                                                      |
| DSM18933_ORF_149  | 42 | 107 | 3.00E-23  | 110 | EmrE is a small multidrug transporter that functions as a homodimer                                                |
| DSM18933_ORF_286  | 47 | 226 | 1.00E-67  | 233 | MacB is an ATP-binding cassette (ABC) transporter that exports macrolides with 14- or 15- membered lactones        |
| DSM18933_ORF_502  | 44 | 225 | 1.00E-59  | 236 | vanRF is a vanR variant found in the vanF gene cluster                                                             |
| DSM18933_ORF_616  | 49 | 228 | 3.00E-70  | 229 | vanRF is a vanR variant found in the vanF gene cluster                                                             |
| DSM18933_ORF_1243 | 44 | 417 | 7.00E-115 | 422 | Mycobacterium tuberculosis murA confers intrinsic resistance to fosfomicin                                         |
| DSM18933_ORF_1422 | 46 | 645 | 0         | 766 | PBP1a is a penicillin-binding protein found in Streptococcus pneumoniae                                            |
| DSM18933_ORF_1449 | 68 | 396 | 0         | 395 | Sequence variants of Streptomyces cinnamomeus elongation factor Tu that confer resistance to elfamycin antibiotics |
| DSM20492_ORF_47   | 45 | 225 | 1.00E-62  | 236 | vanRM is a vanR variant found in the vanM gene cluster                                                             |
| DSM20492_ORF_69   | 50 | 500 | 5.00E-172 | 493 | LsaA is an ABC efflux pump expressed in Enterococcus faecalis                                                      |
| DSM20492_ORF_218  | 48 | 233 | 1.00E-70  | 229 | vanRF is a vanR variant found in the vanF gene cluster                                                             |
| DSM20492_ORF_577  | 46 | 418 | 3.00E-121 | 440 | Mycobacterium tuberculosis murA confers intrinsic resistance to fosfomicin                                         |
| DSM20492_ORF_617  | 69 | 396 | 0         | 395 | Sequence variants of Streptomyces cinnamomeus elongation factor Tu that confer resistance to elfamycin antibiotics |
| DSM20492_ORF_862  | 40 | 583 | 9.00E-148 | 578 | AdeC is the outer membrane factor of the AdeABC multidrug efflux complex                                           |
| DSM20492_ORF_866  | 45 | 648 | 0         | 772 | PBP1a is a penicillin-binding protein found in Streptococcus pneumoniae                                            |
| DSM20492_ORF_1098 | 41 | 233 | 3.00E-54  | 233 | vanRE is a vanR variant found in the vanE gene cluster                                                             |
| DSM20492_ORF_1287 | 40 | 222 | 7.00E-47  | 224 | MacB is an ATP-binding cassette (ABC) transporter that exports macrolides with 14- or 15- membered lactones        |
| DSM20492_ORF_1350 | 44 | 222 | 4.00E-62  | 227 | MacB is an ATP-binding cassette (ABC) transporter that exports macrolides with 14- or 15- membered lactones        |
| DSM20492_ORF_1554 | 43 | 221 | 1.00E-56  | 233 | MacB is an ATP-binding cassette (ABC) transporter that exports macrolides with 14- or 15- membered lactones        |
| DSM20554_ORF_46   | 45 | 225 | 1.00E-62  | 236 | vanRM is a vanR variant found in the vanM gene cluster                                                             |
| DSM20554_ORF_68   | 50 | 500 | 5.00E-172 | 493 | LsaA is an ABC efflux pump expressed in Enterococcus faecalis                                                      |
| DSM20554_ORF_208  | 48 | 233 | 1.00E-70  | 229 | vanRF is a vanR variant found in the vanF gene cluster                                                             |
| DSM20554_ORF_565  | 46 | 418 | 3.00E-121 | 440 | Mycobacterium tuberculosis murA confers intrinsic resistance to fosfomicin                                         |
| DSM20554_ORF_681  | 69 | 396 | 0         | 395 | Sequence variants of Streptomyces cinnamomeus elongation factor Tu that confer resistance to elfamycin antibiotics |
| DSM20554_ORF_910  | 40 | 583 | 9.00E-148 | 578 | AdeC is the outer membrane factor of the AdeABC multidrug efflux complex                                           |
| DSM20554_ORF_914  | 45 | 648 | 0         | 772 | PBP1a is a penicillin-binding protein found in Streptococcus pneumoniae                                            |
| DSM20554_ORF_1106 | 41 | 233 | 3.00E-54  | 233 | vanRE is a vanR variant found in the vanE gene cluster                                                             |
| DSM20554_ORF_1298 | 40 | 222 | 7.00E-47  | 224 | MacB is an ATP-binding cassette (ABC) transporter that exports macrolides with 14- or 15- membered lactones        |
| DSM20554_ORF_1361 | 44 | 222 | 4.00E-62  | 227 | MacB is an ATP-binding cassette (ABC) transporter that exports macrolides with 14- or 15- membered lactones        |
| DSM20554_ORF_1581 | 43 | 221 | 1.00E-56  | 233 | MacB is an ATP-binding cassette (ABC) transporter that exports macrolides with 14- or 15- membered lactones        |
| DSM20555_ORF_55   | 45 | 225 | 1.00E-62  | 236 | vanRM is a vanR variant found in the vanM gene cluster                                                             |
| DSM20555_ORF_72   | 50 | 498 | 3.00E-172 | 493 | LsaA is an ABC efflux pump expressed in Enterococcus faecalis                                                      |
| DSM20555_ORF_212  | 48 | 233 | 1.00E-70  | 229 | vanRF is a vanR variant found in the vanF gene cluster                                                             |
| DSM20555_ORF_554  | 46 | 418 | 2.00E-121 | 441 | Mycobacterium tuberculosis murA confers intrinsic resistance to fosfomicin                                         |
| DSM20555_ORF_594  | 69 | 396 | 0         | 395 | Sequence variants of Streptomyces cinnamomeus elongation factor Tu that confer resistance to elfamycin antibiotics |
| DSM20555_ORF_815  | 41 | 573 | 9.00E-147 | 578 | AdeC is the outer membrane factor of the AdeABC multidrug efflux complex                                           |
| DSM20555_ORF_819  | 45 | 648 | 0         | 772 | PBP1a is a penicillin-binding protein found in Streptococcus pneumoniae                                            |
| DSM20555_ORF_1069 | 41 | 233 | 4.00E-54  | 233 | vanRE is a vanR variant found in the vanE gene cluster                                                             |
| DSM20555_ORF_1257 | 40 | 222 | 2.00E-46  | 224 | MacB is an ATP-binding cassette (ABC) transporter that exports macrolides with 14- or 15- membered lactones        |
| DSM20555_ORF_1319 | 44 | 222 | 2.00E-61  | 227 | MacB is an ATP-binding cassette (ABC) transporter that exports macrolides with 14- or 15- membered lactones        |
| DSM20555_ORF_1535 | 43 | 221 | 1.00E-56  | 233 | MacB is an ATP-binding cassette (ABC) transporter that exports macrolides with 14- or 15- membered lactones        |
| GJ24_ORF_21       | 50 | 498 | 2.00E-171 | 493 | LsaA is an ABC efflux pump expressed in Enterococcus faecalis                                                      |
| GJ24_ORF_180      | 48 | 233 | 1.00E-70  | 229 | vanRF is a vanR variant found in the vanF gene cluster                                                             |
| GJ24_ORF_620      | 46 | 418 | 1.00E-120 | 441 | Mycobacterium tuberculosis murA confers intrinsic resistance to fosfomicin                                         |
| GJ24_ORF_661      | 69 | 396 | 0         | 395 | Sequence variants of Streptomyces cinnamomeus elongation factor Tu that confer resistance to elfamycin antibiotics |
| GJ24_ORF_870      | 40 | 583 | 6.00E-146 | 578 | AdeC is the outer membrane factor of the AdeABC multidrug efflux complex                                           |
| GJ24_ORF_874      | 45 | 648 | 0         | 772 | PBP1a is a penicillin-binding protein found in Streptococcus pneumoniae                                            |
| GJ24_ORF_1110     | 41 | 233 | 3.00E-54  | 233 | vanRE is a vanR variant found in the vanE gene cluster                                                             |
| GJ24_ORF_1344     | 40 | 222 | 2.00E-46  | 224 | MacB is an ATP-binding cassette (ABC) transporter that exports macrolides with 14- or 15- membered lactones        |
| GJ24_ORF_1407     | 44 | 222 | 1.00E-61  | 227 | MacB is an ATP-binding cassette (ABC) transporter that exports macrolides with 14- or 15- membered lactones        |
| GJ24_ORF_1736     | 45 | 225 | 1.00E-62  | 236 | vanRM is a vanR variant found in the vanM gene cluster                                                             |
| gul1_ORF_54       | 45 | 225 | 1.00E-62  | 236 | vanRM is a vanR variant found in the vanM gene cluster                                                             |
| gul1_ORF_71       | 50 | 498 | 3.00E-172 | 493 | LsaA is an ABC efflux pump expressed in Enterococcus faecalis                                                      |
| gul1_ORF_215      | 48 | 233 | 1.00E-70  | 229 | vanRF is a vanR variant found in the vanF gene cluster                                                             |
| gul1_ORF_519      | 46 | 418 | 2.00E-121 | 441 | Mycobacterium tuberculosis murA confers intrinsic resistance to fosfomicin                                         |
| gul1_ORF_560      | 69 | 396 | 0         | 395 | Sequence variants of Streptomyces cinnamomeus elongation factor Tu that confer resistance to elfamycin antibiotics |
| gul1_ORF_783      | 41 | 573 | 9.00E-147 | 578 | AdeC is the outer membrane factor of the AdeABC multidrug efflux complex                                           |
| gul1_ORF_787      | 45 | 648 | 0         | 772 | PBP1a is a penicillin-binding protein found in Streptococcus pneumoniae                                            |
| gul1_ORF_1039     | 41 | 233 | 4.00E-54  | 233 | vanRE is a vanR variant found in the vanE gene cluster                                                             |
| gul1_ORF_1226     | 40 | 222 | 2.00E-46  | 224 | MacB is an ATP-binding cassette (ABC) transporter that exports macrolides with 14- or 15- membered lactones        |
| gul1_ORF_1288     | 44 | 222 | 2.00E-61  | 227 | MacB is an ATP-binding cassette (ABC) transporter that exports macrolides with 14- or 15- membered lactones        |
| gul1_ORF_1505     | 43 | 221 | 1.00E-56  | 233 | MacB is an ATP-binding cassette (ABC) transporter that exports macrolides with 14- or 15- membered lactones        |
| gul2_ORF_55       | 45 | 225 | 1.00E-62  | 236 | vanRM is a vanR variant found in the vanM gene cluster                                                             |
| gul2_ORF_72       | 50 | 498 | 3.00E-172 | 493 | LsaA is an ABC efflux pump expressed in Enterococcus faecalis                                                      |
| gul2_ORF_217      | 48 | 233 | 1.00E-70  | 229 | vanRF is a vanR variant found in the vanF gene cluster                                                             |
| gul2_ORF_559      | 46 | 418 | 2.00E-121 | 441 | Mycobacterium tuberculosis murA confers intrinsic resistance to fosfomicin                                         |
| gul2_ORF_600      | 69 | 396 | 0         | 395 | Sequence variants of Streptomyces cinnamomeus elongation factor Tu that confer resistance to elfamycin antibiotics |
| gul2_ORF_825      | 41 | 573 | 9.00E-147 | 578 | AdeC is the outer membrane factor of the AdeABC multidrug efflux complex                                           |
| gul2_ORF_829      | 45 | 648 | 0         | 772 | PBP1a is a penicillin-binding protein found in Streptococcus pneumoniae                                            |
| gul2_ORF_1081     | 41 | 233 | 4.00E-54  | 233 | vanRE is a vanR variant found in the vanE gene cluster                                                             |
| gul2_ORF_1268     | 40 | 222 | 2.00E-46  | 224 | MacB is an ATP-binding cassette (ABC) transporter that exports macrolides with 14- or 15- membered lactones        |
| gul2_ORF_1330     | 44 | 222 | 2.00E-61  | 227 | MacB is an ATP-binding cassette (ABC) transporter that exports macrolides with 14- or 15- membered lactones        |
| gul2_ORF_1547     | 43 | 221 | 1.00E-56  | 233 | MacB is an ATP-binding cassette (ABC) transporter that exports macrolides with 14- or 15- membered lactones        |
| JCM1040_ORF_49    | 45 | 225 | 1.00E-62  | 236 | vanRM is a vanR variant found in the vanM gene cluster                                                             |
| JCM1040_ORF_70    | 50 | 498 | 4.00E-171 | 493 | LsaA is an ABC efflux pump expressed in Enterococcus faecalis                                                      |
| JCM1040_ORF_215   | 48 | 233 | 1.00E-70  | 229 | vanRF is a vanR variant found in the vanF gene cluster                                                             |
| JCM1040_ORF_599   | 46 | 418 | 8.00E-123 | 440 | Mycobacterium tuberculosis murA confers intrinsic resistance to fosfomicin                                         |
| JCM1040_ORF_639   | 69 | 396 | 0         | 395 | Sequence variants of Streptomyces cinnamomeus elongation factor Tu that confer resistance to elfamycin antibiotics |
| JCM1040_ORF_876   | 41 | 569 | 4.00E-147 | 578 | AdeC is the outer membrane factor of the AdeABC multidrug efflux complex                                           |
| JCM1040_ORF_880   | 45 | 648 | 0         | 772 | PBP1a is a penicillin-binding protein found in Streptococcus pneumoniae                                            |
| JCM1040_ORF_1123  | 41 | 233 | 3.00E-54  | 233 | vanRE is a vanR variant found in the vanE gene cluster                                                             |
| JCM1040_ORF_1300  | 40 | 222 | 7.00E-47  | 224 | MacB is an ATP-binding cassette (ABC) transporter that exports macrolides with 14- or 15- membered lactones        |
| JCM1040_ORF_1362  | 44 | 222 | 4.00E-62  | 227 | MacB is an ATP-binding cassette (ABC) transporter that exports macrolides with 14- or 15- membered lactones        |
| JCM1040_ORF_1589  | 43 | 219 | 2.00E-53  | 233 | MacB is an ATP-binding cassette (ABC) transporter that exports macrolides with 14- or 15- membered lactones        |
| JCM1040_ORF_1656  | 40 | 227 | 1.00E-54  | 233 | vanRM is a vanR variant found in the vanM gene cluster                                                             |
| JCM1042_ORF_53    | 45 | 225 | 1.00E-62  | 236 | vanRM is a vanR variant found in the vanM gene cluster                                                             |
| JCM1042_ORF_73    | 49 | 500 | 1.00E-171 | 493 | LsaA is an ABC efflux pump expressed in Enterococcus faecalis                                                      |
| JCM1042_ORF_218   | 48 | 233 | 1.00E-70  | 229 | vanRF is a vanR variant found in the vanF gene cluster                                                             |
| JCM1042_ORF_549   | 46 | 418 | 2.00E-121 | 441 | Mycobacterium tuberculosis murA confers intrinsic resistance to fosfomicin                                         |
| JCM1042_ORF_590   | 69 | 396 | 0         | 395 | Sequence variants of Streptomyces cinnamomeus elongation factor Tu that confer resistance to elfamycin antibiotics |
| JCM1042_ORF_819   | 40 | 583 | 4.00E-146 | 578 | AdeC is the outer membrane factor of the AdeABC multidrug efflux complex                                           |
| JCM1042_ORF_824   | 45 | 648 | 0         | 772 | PBP1a is a penicillin-binding protein found in Streptococcus pneumoniae                                            |
| JCM1042_ORF_1071  | 41 | 233 | 3.00E-54  | 233 | vanRE is a vanR variant found in the vanE gene cluster                                                             |

|                      |    |     |           |     |                                                                                                                    |
|----------------------|----|-----|-----------|-----|--------------------------------------------------------------------------------------------------------------------|
| JCM1042_ORF_1252     | 40 | 222 | 7.00E-47  | 224 | MacB is an ATP-binding cassette (ABC) transporter that exports macrolides with 14- or 15- membered lactones        |
| JCM1042_ORF_1315     | 44 | 222 | 1.00E-61  | 227 | MacB is an ATP-binding cassette (ABC) transporter that exports macrolides with 14- or 15- membered lactones        |
| JCM1042_ORF_1545     | 43 | 221 | 2.00E-56  | 244 | MacB is an ATP-binding cassette (ABC) transporter that exports macrolides with 14- or 15- membered lactones        |
| JCM1044_ORF_54       | 45 | 225 | 1.00E-62  | 236 | vanRM is a vanR variant found in the vanM gene cluster                                                             |
| JCM1044_ORF_71       | 49 | 500 | 1.00E-171 | 493 | LsaA is an ABC efflux pump expressed in Enterococcus faecalis                                                      |
| JCM1044_ORF_216      | 48 | 233 | 1.00E-70  | 229 | vanRF is a vanR variant found in the vanF gene cluster                                                             |
| JCM1044_ORF_504      | 46 | 418 | 2.00E-121 | 441 | Mycobacterium tuberculosis murA confers intrinsic resistance to fosfomycin                                         |
| JCM1044_ORF_544      | 69 | 396 | 0         | 395 | Sequence variants of Streptomyces cinnamomeus elongation factor Tu that confer resistance to elfamycin antibiotics |
| JCM1044_ORF_778      | 40 | 583 | 4.00E-146 | 578 | AdeC is the outer membrane factor of the AdeABC multidrug efflux complex                                           |
| JCM1044_ORF_783      | 45 | 648 | 0         | 772 | PBP1a is a penicillin-binding protein found in Streptococcus pneumoniae                                            |
| JCM1044_ORF_1031     | 41 | 233 | 3.00E-54  | 233 | vanRE is a vanR variant found in the vanE gene cluster                                                             |
| JCM1044_ORF_1210     | 40 | 222 | 7.00E-47  | 224 | MacB is an ATP-binding cassette (ABC) transporter that exports macrolides with 14- or 15- membered lactones        |
| JCM1044_ORF_1273     | 44 | 222 | 1.00E-61  | 227 | MacB is an ATP-binding cassette (ABC) transporter that exports macrolides with 14- or 15- membered lactones        |
| JCM1044_ORF_1498     | 43 | 221 | 2.00E-56  | 244 | MacB is an ATP-binding cassette (ABC) transporter that exports macrolides with 14- or 15- membered lactones        |
| JCM1045_ORF_56       | 45 | 225 | 1.00E-62  | 236 | vanRM is a vanR variant found in the vanM gene cluster                                                             |
| JCM1045_ORF_74       | 50 | 498 | 3.00E-172 | 493 | LsaA is an ABC efflux pump expressed in Enterococcus faecalis                                                      |
| JCM1045_ORF_215      | 48 | 233 | 1.00E-70  | 229 | vanRF is a vanR variant found in the vanF gene cluster                                                             |
| JCM1045_ORF_544      | 46 | 418 | 4.00E-121 | 440 | Mycobacterium tuberculosis murA confers intrinsic resistance to fosfomycin                                         |
| JCM1045_ORF_649      | 69 | 396 | 0         | 395 | Sequence variants of Streptomyces cinnamomeus elongation factor Tu that confer resistance to elfamycin antibiotics |
| JCM1045_ORF_886      | 41 | 583 | 2.00E-148 | 578 | AdeC is the outer membrane factor of the AdeABC multidrug efflux complex                                           |
| JCM1045_ORF_890      | 45 | 648 | 0         | 772 | PBP1a is a penicillin-binding protein found in Streptococcus pneumoniae                                            |
| JCM1045_ORF_1145     | 41 | 233 | 4.00E-54  | 233 | vanRE is a vanR variant found in the vanE gene cluster                                                             |
| JCM1045_ORF_1343     | 40 | 222 | 5.00E-47  | 224 | MacB is an ATP-binding cassette (ABC) transporter that exports macrolides with 14- or 15- membered lactones        |
| JCM1045_ORF_1411     | 44 | 222 | 1.00E-61  | 227 | MacB is an ATP-binding cassette (ABC) transporter that exports macrolides with 14- or 15- membered lactones        |
| JCM1046_ORF_54       | 45 | 225 | 1.00E-62  | 236 | vanRM is a vanR variant found in the vanM gene cluster                                                             |
| JCM1046_ORF_75       | 50 | 498 | 8.00E-168 | 493 | LsaA is an ABC efflux pump expressed in Enterococcus faecalis                                                      |
| JCM1046_ORF_220      | 48 | 233 | 1.00E-70  | 229 | vanRF is a vanR variant found in the vanF gene cluster                                                             |
| JCM1046_ORF_569      | 46 | 418 | 2.00E-121 | 441 | Mycobacterium tuberculosis murA confers intrinsic resistance to fosfomycin                                         |
| JCM1046_ORF_609      | 69 | 396 | 0         | 395 | Sequence variants of Streptomyces cinnamomeus elongation factor Tu that confer resistance to elfamycin antibiotics |
| JCM1046_ORF_874      | 40 | 583 | 2.00E-147 | 578 | AdeC is the outer membrane factor of the AdeABC multidrug efflux complex                                           |
| JCM1046_ORF_878      | 45 | 648 | 0         | 772 | PBP1a is a penicillin-binding protein found in Streptococcus pneumoniae                                            |
| JCM1046_ORF_1099     | 41 | 233 | 3.00E-54  | 233 | vanRE is a vanR variant found in the vanE gene cluster                                                             |
| JCM1046_ORF_1251     | 62 | 61  | 2.00E-22  | 73  | VanU is a transcriptional activator of the vanG operon of vancomycin resistance genes                              |
| JCM1046_ORF_1320     | 40 | 222 | 1.00E-45  | 224 | MacB is an ATP-binding cassette (ABC) transporter that exports macrolides with 14- or 15- membered lactones        |
| JCM1046_ORF_1382     | 44 | 222 | 1.00E-61  | 227 | MacB is an ATP-binding cassette (ABC) transporter that exports macrolides with 14- or 15- membered lactones        |
| JCM1046_ORF_1829     | 90 | 639 | 0         | 644 | TetM is a ribosomal protection protein that confers tetracycline resistance                                        |
| JCM1047_ORF_54       | 45 | 225 | 1.00E-62  | 236 | vanRM is a vanR variant found in the vanM gene cluster                                                             |
| JCM1047_ORF_91       | 49 | 496 | 8.00E-172 | 492 | LsaA is an ABC efflux pump expressed in Enterococcus faecalis                                                      |
| JCM1047_ORF_241      | 48 | 233 | 1.00E-70  | 229 | vanRF is a vanR variant found in the vanF gene cluster                                                             |
| JCM1047_ORF_664      | 46 | 418 | 7.00E-122 | 441 | Mycobacterium tuberculosis murA confers intrinsic resistance to fosfomycin                                         |
| JCM1047_ORF_720      | 69 | 396 | 0         | 395 | Sequence variants of Streptomyces cinnamomeus elongation factor Tu that confer resistance to elfamycin antibiotics |
| JCM1047_ORF_1061     | 40 | 579 | 2.00E-144 | 578 | AdeC is the outer membrane factor of the AdeABC multidrug efflux complex                                           |
| JCM1047_ORF_1065     | 45 | 648 | 0         | 766 | PBP1a is a penicillin-binding protein found in Streptococcus pneumoniae                                            |
| JCM1047_ORF_1301     | 41 | 233 | 1.00E-53  | 233 | vanRE is a vanR variant found in the vanE gene cluster                                                             |
| JCM1047_ORF_1485     | 40 | 222 | 1.00E-46  | 224 | MacB is an ATP-binding cassette (ABC) transporter that exports macrolides with 14- or 15- membered lactones        |
| JCM1047_ORF_1547     | 44 | 222 | 1.00E-61  | 227 | MacB is an ATP-binding cassette (ABC) transporter that exports macrolides with 14- or 15- membered lactones        |
| JCM1047_ORF_2131     | 58 | 67  | 8.00E-24  | 84  | VanU is a transcriptional activator of the vanG operon of vancomycin resistance genes                              |
| JCM1047_ORF_2228     | 90 | 641 | 0         | 646 | TetM is a ribosomal protection protein that confers tetracycline resistance                                        |
| JCM1230_ORF_72       | 45 | 225 | 1.00E-62  | 236 | vanRM is a vanR variant found in the vanM gene cluster                                                             |
| JCM1230_ORF_93       | 50 | 498 | 4.00E-172 | 493 | LsaA is an ABC efflux pump expressed in Enterococcus faecalis                                                      |
| JCM1230_ORF_258      | 48 | 233 | 1.00E-70  | 229 | vanRF is a vanR variant found in the vanF gene cluster                                                             |
| JCM1230_ORF_548      | 46 | 418 | 2.00E-121 | 441 | Mycobacterium tuberculosis murA confers intrinsic resistance to fosfomycin                                         |
| JCM1230_ORF_588      | 69 | 396 | 0         | 395 | Sequence variants of Streptomyces cinnamomeus elongation factor Tu that confer resistance to elfamycin antibiotics |
| JCM1230_ORF_798      | 40 | 583 | 7.00E-145 | 578 | AdeC is the outer membrane factor of the AdeABC multidrug efflux complex                                           |
| JCM1230_ORF_802      | 45 | 648 | 0         | 772 | PBP1a is a penicillin-binding protein found in Streptococcus pneumoniae                                            |
| JCM1230_ORF_1046     | 41 | 233 | 3.00E-54  | 233 | vanRE is a vanR variant found in the vanE gene cluster                                                             |
| JCM1230_ORF_1288     | 40 | 222 | 1.00E-46  | 224 | MacB is an ATP-binding cassette (ABC) transporter that exports macrolides with 14- or 15- membered lactones        |
| JCM1230_ORF_1350     | 44 | 222 | 1.00E-61  | 227 | MacB is an ATP-binding cassette (ABC) transporter that exports macrolides with 14- or 15- membered lactones        |
| L21_ORF_50           | 45 | 225 | 1.00E-62  | 236 | vanRM is a vanR variant found in the vanM gene cluster                                                             |
| L21_ORF_67           | 50 | 498 | 7.00E-174 | 493 | LsaA is an ABC efflux pump expressed in Enterococcus faecalis                                                      |
| L21_ORF_222          | 48 | 233 | 1.00E-70  | 229 | vanRF is a vanR variant found in the vanF gene cluster                                                             |
| L21_ORF_688          | 46 | 418 | 8.00E-123 | 440 | Mycobacterium tuberculosis murA confers intrinsic resistance to fosfomycin                                         |
| L21_ORF_728          | 69 | 396 | 0         | 395 | Sequence variants of Streptomyces cinnamomeus elongation factor Tu that confer resistance to elfamycin antibiotics |
| L21_ORF_969          | 41 | 573 | 4.00E-147 | 578 | AdeC is the outer membrane factor of the AdeABC multidrug efflux complex                                           |
| L21_ORF_973          | 45 | 648 | 0         | 772 | PBP1a is a penicillin-binding protein found in Streptococcus pneumoniae                                            |
| L21_ORF_1225         | 41 | 233 | 3.00E-54  | 233 | vanRE is a vanR variant found in the vanE gene cluster                                                             |
| L21_ORF_1405         | 40 | 222 | 7.00E-47  | 224 | MacB is an ATP-binding cassette (ABC) transporter that exports macrolides with 14- or 15- membered lactones        |
| L21_ORF_1467         | 44 | 222 | 2.00E-61  | 227 | MacB is an ATP-binding cassette (ABC) transporter that exports macrolides with 14- or 15- membered lactones        |
| L21_ORF_1675         | 43 | 219 | 5.00E-53  | 237 | MacB is an ATP-binding cassette (ABC) transporter that exports macrolides with 14- or 15- membered lactones        |
| L21_ORF_1986         | 58 | 67  | 8.00E-24  | 84  | VanU is a transcriptional activator of the vanG operon of vancomycin resistance genes                              |
| LMG14476_ORF_69      | 45 | 225 | 1.00E-62  | 236 | vanRM is a vanR variant found in the vanM gene cluster                                                             |
| LMG14476_ORF_90      | 50 | 498 | 8.00E-173 | 493 | LsaA is an ABC efflux pump expressed in Enterococcus faecalis                                                      |
| LMG14476_ORF_231     | 48 | 231 | 2.00E-70  | 229 | vanRF is a vanR variant found in the vanF gene cluster                                                             |
| LMG14476_ORF_268     | 40 | 263 | 1.00E-59  | 327 | vanHA, also known as vanH, is a vanH variant in the vanA gene cluster                                              |
| LMG14476_ORF_549     | 69 | 418 | 2.00E-121 | 441 | Mycobacterium tuberculosis murA confers intrinsic resistance to fosfomycin                                         |
| LMG14476_ORF_589     | 46 | 396 | 0         | 395 | Sequence variants of Streptomyces cinnamomeus elongation factor Tu that confer resistance to elfamycin antibiotics |
| LMG14476_ORF_968     | 40 | 583 | 7.00E-145 | 578 | AdeC is the outer membrane factor of the AdeABC multidrug efflux complex                                           |
| LMG14476_ORF_972     | 45 | 648 | 0         | 772 | PBP1a is a penicillin-binding protein found in Streptococcus pneumoniae                                            |
| LMG14476_ORF_1201    | 41 | 233 | 3.00E-54  | 233 | vanRE is a vanR variant found in the vanE gene cluster                                                             |
| LMG14476_ORF_1347    | 60 | 61  | 3.00E-23  | 68  | VanU is a transcriptional activator of the vanG operon of vancomycin resistance genes                              |
| LMG14476_ORF_1417    | 40 | 222 | 6.00E-47  | 224 | MacB is an ATP-binding cassette (ABC) transporter that exports macrolides with 14- or 15- membered lactones        |
| LMG14476_ORF_1480    | 43 | 222 | 2.00E-61  | 227 | MacB is an ATP-binding cassette (ABC) transporter that exports macrolides with 14- or 15- membered lactones        |
| LMG14476_ORF_1711    | 44 | 221 | 4.00E-56  | 244 | MacB is an ATP-binding cassette (ABC) transporter that exports macrolides with 14- or 15- membered lactones        |
| LMG14477_ORF_52      | 45 | 225 | 1.00E-62  | 236 | vanRM is a vanR variant found in the vanM gene cluster                                                             |
| LMG14477_ORF_73      | 50 | 498 | 8.00E-173 | 493 | LsaA is an ABC efflux pump expressed in Enterococcus faecalis                                                      |
| LMG14477_ORF_211     | 48 | 231 | 2.00E-70  | 229 | vanRF is a vanR variant found in the vanF gene cluster                                                             |
| LMG14477_ORF_248     | 40 | 263 | 1.00E-59  | 327 | vanHA, also known as vanH, is a vanH variant in the vanA gene cluster                                              |
| LMG14477_ORF_543     | 46 | 418 | 2.00E-121 | 441 | Mycobacterium tuberculosis murA confers intrinsic resistance to fosfomycin                                         |
| LMG14477_ORF_583     | 69 | 396 | 0         | 395 | Sequence variants of Streptomyces cinnamomeus elongation factor Tu that confer resistance to elfamycin antibiotics |
| LMG14477_ORF_952     | 40 | 583 | 7.00E-145 | 578 | AdeC is the outer membrane factor of the AdeABC multidrug efflux complex                                           |
| LMG14477_ORF_956     | 45 | 648 | 0         | 772 | PBP1a is a penicillin-binding protein found in Streptococcus pneumoniae                                            |
| LMG14477_ORF_1185    | 41 | 233 | 3.00E-54  | 233 | vanRE is a vanR variant found in the vanE gene cluster                                                             |
| LMG14477_ORF_1330    | 60 | 61  | 3.00E-23  | 68  | VanU is a transcriptional activator of the vanG operon of vancomycin resistance genes                              |
| LMG14477_ORF_1401    | 40 | 222 | 6.00E-47  | 224 | MacB is an ATP-binding cassette (ABC) transporter that exports macrolides with 14- or 15- membered lactones        |
| LMG14477_ORF_1464    | 44 | 222 | 2.00E-61  | 227 | MacB is an ATP-binding cassette (ABC) transporter that exports macrolides with 14- or 15- membered lactones        |
| LMG14477_ORF_1697    | 43 | 221 | 4.00E-56  | 244 | MacB is an ATP-binding cassette (ABC) transporter that exports macrolides with 14- or 15- membered lactones        |
| NCIMB702343_ORF_53   | 45 | 225 | 1.00E-62  | 236 | vanRM is a vanR variant found in the vanM gene cluster                                                             |
| NCIMB702343_ORF_79   | 48 | 223 | 3.00E-63  | 226 | LsaA is an ABC efflux pump expressed in Enterococcus faecalis                                                      |
| NCIMB702343_ORF_80   | 52 | 183 | 4.00E-62  | 183 | LsaA is an ABC efflux pump expressed in Enterococcus faecalis                                                      |
| NCIMB702343_ORF_236  | 48 | 233 | 1.00E-70  | 229 | vanRF is a vanR variant found in the vanF gene cluster                                                             |
| NCIMB702343_ORF_578  | 69 | 396 | 0         | 395 | Sequence variants of Streptomyces cinnamomeus elongation factor Tu that confer resistance to elfamycin antibiotics |
| NCIMB702343_ORF_619  | 46 | 418 | 2.00E-122 | 440 | Mycobacterium tuberculosis murA confers intrinsic resistance to fosfomycin                                         |
| NCIMB702343_ORF_850  | 40 | 583 | 2.00E-145 | 578 | AdeC is the outer membrane factor of the AdeABC multidrug efflux complex                                           |
| NCIMB702343_ORF_854  | 45 | 648 | 0         | 772 | PBP1a is a penicillin-binding protein found in Streptococcus pneumoniae                                            |
| NCIMB702343_ORF_1087 | 41 | 233 | 3.00E-54  | 233 | vanRE is a vanR variant found in the vanE gene cluster                                                             |
| NCIMB702343_ORF_1243 | 62 | 62  | 7.00E-23  | 77  | VanU is a transcriptional activator of the vanG operon of vancomycin resistance genes                              |
| NCIMB702343_ORF_1315 | 40 | 222 | 7.00E-47  | 224 | MacB is an ATP-binding cassette (ABC) transporter that exports macrolides with 14- or 15- membered lactones        |
| NCIMB702343_ORF_1381 | 44 | 222 | 4.00E-62  | 227 | MacB is an ATP-binding cassette (ABC) transporter that exports macrolides with 14- or 15- membered lactones        |
| NCIMB702343_ORF_1604 | 43 | 221 | 2.00E-56  | 244 | MacB is an ATP-binding cassette (ABC) transporter that exports macrolides with 14- or 15- membered lactones        |

|                      |    |     |           |     |                                                                                                                    |
|----------------------|----|-----|-----------|-----|--------------------------------------------------------------------------------------------------------------------|
| NCIM8702343_ORF_1779 | 58 | 67  | 8.00E-24  | 84  | VanU is a transcriptional activator of the vanG operon of vancomycin resistance genes                              |
| NCIM8816_ORF_55      | 45 | 225 | 1.00E-62  | 236 | vanRM is a vanR variant found in the vanM gene cluster                                                             |
| NCIM8816_ORF_76      | 49 | 500 | 1.00E-171 | 493 | LsaA is an ABC efflux pump expressed in Enterococcus faecalis                                                      |
| NCIM8816_ORF_221     | 48 | 233 | 1.00E-70  | 229 | vanRF is a vanR variant found in the vanF gene cluster                                                             |
| NCIM8816_ORF_507     | 46 | 418 | 2.00E-121 | 441 | Mycobacterium tuberculosis murA confers intrinsic resistance to fosfomicin                                         |
| NCIM8816_ORF_547     | 69 | 396 | 0         | 395 | Sequence variants of Streptomyces cinnamomeus elongation factor Tu that confer resistance to elfamycin antibiotics |
| NCIM8816_ORF_782     | 40 | 583 | 4.00E-146 | 578 | AdeC is the outer membrane factor of the AdeABC multidrug efflux complex                                           |
| NCIM8816_ORF_787     | 45 | 648 | 0         | 772 | PBP1a is a penicillin-binding protein found in Streptococcus pneumoniae                                            |
| NCIM8816_ORF_1032    | 41 | 233 | 3.00E-54  | 233 | vanRE is a vanR variant found in the vanE gene cluster                                                             |
| NCIM8816_ORF_1253    | 40 | 222 | 7.00E-47  | 224 | MacB is an ATP-binding cassette (ABC) transporter that exports macrolides with 14- or 15- membered lactones        |
| NCIM8816_ORF_1317    | 44 | 222 | 1.00E-61  | 227 | MacB is an ATP-binding cassette (ABC) transporter that exports macrolides with 14- or 15- membered lactones        |
| NCIM8816_ORF_1545    | 43 | 221 | 2.00E-56  | 244 | MacB is an ATP-binding cassette (ABC) transporter that exports macrolides with 14- or 15- membered lactones        |
| NCIM8816_ORF_1605    | 40 | 227 | 1.00E-54  | 233 | vanRM is a vanR variant found in the vanM gene cluster                                                             |
| NCIM8817_ORF_60      | 45 | 225 | 1.00E-62  | 236 | vanRM is a vanR variant found in the vanM gene cluster                                                             |
| NCIM8817_ORF_79      | 50 | 498 | 7.00E-171 | 493 | LsaA is an ABC efflux pump expressed in Enterococcus faecalis                                                      |
| NCIM8817_ORF_221     | 48 | 233 | 1.00E-70  | 229 | vanRF is a vanR variant found in the vanF gene cluster                                                             |
| NCIM8817_ORF_610     | 46 | 418 | 2.00E-121 | 441 | Mycobacterium tuberculosis murA confers intrinsic resistance to fosfomicin                                         |
| NCIM8817_ORF_651     | 69 | 396 | 0         | 395 | Sequence variants of Streptomyces cinnamomeus elongation factor Tu that confer resistance to elfamycin antibiotics |
| NCIM8817_ORF_880     | 41 | 579 | 2.00E-148 | 578 | AdeC is the outer membrane factor of the AdeABC multidrug efflux complex                                           |
| NCIM8817_ORF_884     | 45 | 648 | 0         | 772 | PBP1a is a penicillin-binding protein found in Streptococcus pneumoniae                                            |
| NCIM8817_ORF_1133    | 41 | 233 | 3.00E-54  | 233 | vanRE is a vanR variant found in the vanE gene cluster                                                             |
| NCIM8817_ORF_1309    | 40 | 222 | 1.00E-46  | 224 | MacB is an ATP-binding cassette (ABC) transporter that exports macrolides with 14- or 15- membered lactones        |
| NCIM8817_ORF_1371    | 44 | 222 | 9.00E-62  | 227 | MacB is an ATP-binding cassette (ABC) transporter that exports macrolides with 14- or 15- membered lactones        |
| NCIM8818_ORF_51      | 45 | 225 | 1.00E-62  | 236 | vanRM is a vanR variant found in the vanM gene cluster                                                             |
| NCIM8818_ORF_71      | 50 | 498 | 2.00E-171 | 493 | LsaA is an ABC efflux pump expressed in Enterococcus faecalis                                                      |
| NCIM8818_ORF_226     | 49 | 231 | 3.00E-71  | 229 | vanRF is a vanR variant found in the vanF gene cluster                                                             |
| NCIM8818_ORF_452     | 43 | 219 | 5.00E-53  | 233 | MacB is an ATP-binding cassette (ABC) transporter that exports macrolides with 14- or 15- membered lactones        |
| NCIM8818_ORF_740     | 46 | 418 | 2.00E-121 | 441 | Mycobacterium tuberculosis murA confers intrinsic resistance to fosfomicin                                         |
| NCIM8818_ORF_780     | 69 | 396 | 0         | 395 | Sequence variants of Streptomyces cinnamomeus elongation factor Tu that confer resistance to elfamycin antibiotics |
| NCIM8818_ORF_1075    | 40 | 583 | 4.00E-146 | 578 | AdeC is the outer membrane factor of the AdeABC multidrug efflux complex                                           |
| NCIM8818_ORF_1079    | 45 | 648 | 0         | 772 | PBP1a is a penicillin-binding protein found in Streptococcus pneumoniae                                            |
| NCIM8818_ORF_1330    | 41 | 233 | 4.00E-54  | 233 | vanRE is a vanR variant found in the vanE gene cluster                                                             |
| NCIM8818_ORF_1484    | 62 | 61  | 6.00E-22  | 73  | VanU is a transcriptional activator of the vanG operon of vancomycin resistance genes                              |
| NCIM8818_ORF_1530    | 40 | 222 | 7.00E-47  | 224 | MacB is an ATP-binding cassette (ABC) transporter that exports macrolides with 14- or 15- membered lactones        |
| NCIM8818_ORF_1541    | 45 | 305 | 1.00E-79  | 302 | bcrA is an ABC transporter found in Bacillus licheniformis that confers bacitracin resistance                      |
| NCIM8818_ORF_1650    | 44 | 222 | 1.00E-61  | 227 | MacB is an ATP-binding cassette (ABC) transporter that exports macrolides with 14- or 15- membered lactones        |
| NCIM8818_ORF_1908    | 45 | 77  | 0.00E+00  | 76  | A type III ABC transporter, identified on the novobiocin biosynthetic gene cluster                                 |
| NIAS840_ORF_88       | 48 | 233 | 1.00E-70  | 229 | vanRF is a vanR variant found in the vanF gene cluster                                                             |
| NIAS840_ORF_241      | 49 | 498 | 3.00E-171 | 493 | LsaA is an ABC efflux pump expressed in Enterococcus faecalis                                                      |
| NIAS840_ORF_403      | 49 | 222 | 1.00E-46  | 224 | MacB is an ATP-binding cassette (ABC) transporter that exports macrolides with 14- or 15- membered lactones        |
| NIAS840_ORF_465      | 44 | 198 | 1.00E-52  | 207 | MacB is an ATP-binding cassette (ABC) transporter that exports macrolides with 14- or 15- membered lactones        |
| NIAS840_ORF_467      | 98 | 164 | 9.00E-119 | 164 | InuC is a transposon-mediated nucleotidyltransferase found in Streptococcus agalactiae                             |
| NIAS840_ORF_661      | 99 | 216 | 1.00E-158 | 216 | vathI is a plasmid-mediated acetyltransferase found in Enterococcus faecium                                        |
| NIAS840_ORF_662      | 99 | 525 | 0         | 525 | vgaD is an efflux protein expressed in Enterococcus faecium that confers resistance to streptogramin A antibiotics |
| NIAS840_ORF_793      | 45 | 225 | 1.00E-62  | 236 | vanRM is a vanR variant found in the vanM gene cluster                                                             |
| NIAS840_ORF_1075     | 46 | 418 | 2.00E-121 | 441 | Mycobacterium tuberculosis murA confers intrinsic resistance to fosfomicin                                         |
| NIAS840_ORF_1168     | 69 | 396 | 0         | 395 | Sequence variants of Streptomyces cinnamomeus elongation factor Tu that confer resistance to elfamycin antibiotics |
| NIAS840_ORF_1378     | 41 | 583 | 1.00E-148 | 578 | AdeC is the outer membrane factor of the AdeABC multidrug efflux complex                                           |
| NIAS840_ORF_1382     | 45 | 648 | 0         | 772 | PBP1a is a penicillin-binding protein found in Streptococcus pneumoniae                                            |
| NIAS840_ORF_1588     | 41 | 233 | 3.00E-54  | 233 | vanRE is a vanR variant found in the vanE gene cluster                                                             |
| Ren_ORF_41           | 45 | 225 | 1.00E-62  | 236 | vanRM is a vanR variant found in the vanM gene cluster                                                             |
| Ren_ORF_63           | 50 | 498 | 4.00E-171 | 493 | LsaA is an ABC efflux pump expressed in Enterococcus faecalis                                                      |
| Ren_ORF_230          | 48 | 233 | 2.00E-70  | 229 | vanRF is a vanR variant found in the vanF gene cluster                                                             |
| Ren_ORF_651          | 46 | 418 | 8.00E-123 | 440 | Mycobacterium tuberculosis murA confers intrinsic resistance to fosfomicin                                         |
| Ren_ORF_691          | 69 | 396 | 0         | 395 | Sequence variants of Streptomyces cinnamomeus elongation factor Tu that confer resistance to elfamycin antibiotics |
| Ren_ORF_929          | 41 | 569 | 4.00E-147 | 578 | AdeC is the outer membrane factor of the AdeABC multidrug efflux complex                                           |
| Ren_ORF_933          | 45 | 648 | 0         | 772 | PBP1a is a penicillin-binding protein found in Streptococcus pneumoniae                                            |
| Ren_ORF_1188         | 41 | 233 | 3.00E-54  | 233 | vanRE is a vanR variant found in the vanE gene cluster                                                             |
| Ren_ORF_1386         | 40 | 222 | 3.00E-47  | 224 | MacB is an ATP-binding cassette (ABC) transporter that exports macrolides with 14- or 15- membered lactones        |
| Ren_ORF_1448         | 44 | 222 | 4.00E-62  | 227 | MacB is an ATP-binding cassette (ABC) transporter that exports macrolides with 14- or 15- membered lactones        |
| Ren_ORF_1680         | 49 | 81  | 7.00E-21  | 102 | MacB is an ATP-binding cassette (ABC) transporter that exports macrolides with 14- or 15- membered lactones        |
| Ren_ORF_1681         | 46 | 110 | 1.00E-26  | 131 | MacB is an ATP-binding cassette (ABC) transporter that exports macrolides with 14- or 15- membered lactones        |
| Ren_ORF_1761         | 58 | 67  | 8.00E-24  | 84  | VanU is a transcriptional activator of the vanG operon of vancomycin resistance genes                              |
| Ren_ORF_1999         | 40 | 227 | 1.00E-54  | 233 | vanRM is a vanR variant found in the vanM gene cluster                                                             |
| SMXD51_ORF_100       | 45 | 225 | 1.00E-62  | 236 | vanRM is a vanR variant found in the vanM gene cluster                                                             |
| SMXD51_ORF_205       | 50 | 498 | 1.00E-171 | 493 | LsaA is an ABC efflux pump expressed in Enterococcus faecalis                                                      |
| SMXD51_ORF_366       | 48 | 233 | 1.00E-70  | 229 | vanRF is a vanR variant found in the vanF gene cluster                                                             |
| SMXD51_ORF_691       | 44 | 222 | 1.00E-61  | 227 | MacB is an ATP-binding cassette (ABC) transporter that exports macrolides with 14- or 15- membered lactones        |
| SMXD51_ORF_758       | 40 | 222 | 2.00E-46  | 224 | MacB is an ATP-binding cassette (ABC) transporter that exports macrolides with 14- or 15- membered lactones        |
| SMXD51_ORF_1013      | 46 | 418 | 2.00E-121 | 441 | Mycobacterium tuberculosis murA confers intrinsic resistance to fosfomicin                                         |
| SMXD51_ORF_1055      | 69 | 396 | 0         | 395 | Sequence variants of Streptomyces cinnamomeus elongation factor Tu that confer resistance to elfamycin antibiotics |
| SMXD51_ORF_1276      | 40 | 583 | 6.00E-146 | 578 | AdeC is the outer membrane factor of the AdeABC multidrug efflux complex                                           |
| SMXD51_ORF_1280      | 45 | 648 | 0         | 772 | PBP1a is a penicillin-binding protein found in Streptococcus pneumoniae                                            |
| SMXD51_ORF_1513      | 41 | 233 | 3.00E-54  | 233 | vanRE is a vanR variant found in the vanE gene cluster                                                             |
| SMXD51_ORF_1702      | 97 | 242 | 5.00E-173 | 258 | ErmC is a methyltransferase that catalyzes the methylation of A2058 of the 23S ribosomal RNA in two steps          |
| SMXD51_ORF_1720      | 89 | 639 | 0         | 644 | TetM is a ribosomal protection protein that confers tetracycline resistance                                        |
| SMXD51_ORF_1722      | 98 | 436 | 0         | 442 | TetI is a tetracycline efflux protein found in many species of Gram-negative and Gram-positive bacteria            |
| UCC118_ORF_41        | 45 | 225 | 1.00E-62  | 236 | vanRM is a vanR variant found in the vanM gene cluster                                                             |
| UCC118_ORF_61        | 50 | 498 | 3.00E-171 | 493 | LsaA is an ABC efflux pump expressed in Enterococcus faecalis                                                      |
| UCC118_ORF_240       | 48 | 228 | 2.00E-70  | 229 | vanRF is a vanR variant found in the vanF gene cluster                                                             |
| UCC118_ORF_676       | 46 | 418 | 2.00E-121 | 441 | Mycobacterium tuberculosis murA confers intrinsic resistance to fosfomicin                                         |
| UCC118_ORF_717       | 69 | 396 | 0         | 395 | Sequence variants of Streptomyces cinnamomeus elongation factor Tu that confer resistance to elfamycin antibiotics |
| UCC118_ORF_1015      | 40 | 583 | 1.00E-145 | 578 | AdeC is the outer membrane factor of the AdeABC multidrug efflux complex                                           |
| UCC118_ORF_1019      | 45 | 648 | 0         | 772 | PBP1a is a penicillin-binding protein found in Streptococcus pneumoniae                                            |
| UCC118_ORF_1271      | 41 | 233 | 4.00E-54  | 233 | vanRE is a vanR variant found in the vanE gene cluster                                                             |
| UCC118_ORF_1489      | 40 | 222 | 7.00E-47  | 224 | MacB is an ATP-binding cassette (ABC) transporter that exports macrolides with 14- or 15- membered lactones        |
| UCC118_ORF_1501      | 45 | 305 | 1.00E-79  | 302 | bcrA is an ABC transporter found in Bacillus licheniformis that confers bacitracin resistance                      |
| UCC118_ORF_1583      | 44 | 222 | 1.00E-61  | 227 | MacB is an ATP-binding cassette (ABC) transporter that exports macrolides with 14- or 15- membered lactones        |
| UCC118_ORF_1825      | 43 | 219 | 5.00E-53  | 233 | MacB is an ATP-binding cassette (ABC) transporter that exports macrolides with 14- or 15- membered lactones        |
| UCC119_ORF_52        | 45 | 225 | 1.00E-62  | 236 | vanRM is a vanR variant found in the vanM gene cluster                                                             |
| UCC119_ORF_216       | 48 | 228 | 2.00E-70  | 229 | vanRF is a vanR variant found in the vanF gene cluster                                                             |
| UCC119_ORF_408       | 50 | 498 | 3.00E-171 | 493 | LsaA is an ABC efflux pump expressed in Enterococcus faecalis                                                      |
| UCC119_ORF_594       | 46 | 418 | 2.00E-121 | 441 | Mycobacterium tuberculosis murA confers intrinsic resistance to fosfomicin                                         |
| UCC119_ORF_634       | 69 | 396 | 0         | 395 | Sequence variants of Streptomyces cinnamomeus elongation factor Tu that confer resistance to elfamycin antibiotics |
| UCC119_ORF_933       | 40 | 583 | 1.00E-145 | 578 | AdeC is the outer membrane factor of the AdeABC multidrug efflux complex                                           |
| UCC119_ORF_937       | 45 | 648 | 0         | 772 | PBP1a is a penicillin-binding protein found in Streptococcus pneumoniae                                            |
| UCC119_ORF_1189      | 41 | 233 | 4.00E-54  | 233 | vanRE is a vanR variant found in the vanE gene cluster                                                             |
| UCC119_ORF_1436      | 41 | 222 | 7.00E-47  | 224 | MacB is an ATP-binding cassette (ABC) transporter that exports macrolides with 14- or 15- membered lactones        |
| UCC119_ORF_1447      | 45 | 305 | 1.00E-79  | 302 | bcrA is an ABC transporter found in Bacillus licheniformis that confers bacitracin resistance                      |
| UCC119_ORF_1528      | 44 | 222 | 1.00E-61  | 227 | MacB is an ATP-binding cassette (ABC) transporter that exports macrolides with 14- or 15- membered lactones        |
| UCC119_ORF_1774      | 43 | 219 | 5.00E-53  | 233 | MacB is an ATP-binding cassette (ABC) transporter that exports macrolides with 14- or 15- membered lactones        |

Table S9

| gene                 | functional annotation                                                                  | % identity | query coverage | e-value   | query length |
|----------------------|----------------------------------------------------------------------------------------|------------|----------------|-----------|--------------|
| 01M14315_ORF_1114    | ATP-dependent_Clp_protease_proteolytic_subunit                                         | 72.59      | 197            | 1.00E-105 | 197          |
| 01M14315_ORF_1197    | UDP-glucose_pyrophosphorylase                                                          | 72.7       | 293            | 4.00E-151 | 290          |
| 778_ORF_1065         | ATP-dependent_Clp_protease_proteolytic_subunit                                         | 72.59      | 197            | 1.00E-105 | 197          |
| 778_ORF_1147         | UDP-glucose_pyrophosphorylase                                                          | 72.7       | 293            | 2.00E-151 | 290          |
| 866_ORF_1162         | ATP-dependent_Clp_protease_proteolytic_subunit                                         | 72.59      | 197            | 1.00E-105 | 197          |
| 866_ORF_1246         | UDP-glucose_pyrophosphorylase                                                          | 72.7       | 293            | 2.00E-151 | 290          |
| ACS116_ORF_1278      | ATP-dependent_Clp_protease_proteolytic_subunit                                         | 72.59      | 197            | 1.00E-105 | 197          |
| ACS116_ORF_1363      | UDP-glucose_pyrophosphorylase                                                          | 72.7       | 293            | 2.00E-151 | 290          |
| AH4231_ORF_1274      | ATP-dependent_Clp_protease_proteolytic_subunit                                         | 72.59      | 197            | 1.00E-105 | 197          |
| AH4231_ORF_1357      | UDP-glucose_pyrophosphorylase                                                          | 72.7       | 293            | 2.00E-151 | 290          |
| AH4331_ORF_1249      | ATP-dependent_Clp_protease_proteolytic_subunit                                         | 72.59      | 197            | 1.00E-105 | 197          |
| AH4331_ORF_1331      | UDP-glucose_pyrophosphorylase                                                          | 72.7       | 293            | 2.00E-151 | 290          |
| AH4331_ORF_2194      | cell_wall_surface_anchor_family_protein_Plasminogen-_and_Fibronectin-binding_protein_B | 70.3       | 101            | 9.00E-43  | 105          |
| AH43324_ORF_1245     | ATP-dependent_Clp_protease_proteolytic_subunit                                         | 72.59      | 197            | 1.00E-105 | 197          |
| AH43324_ORF_1326     | UDP-glucose_pyrophosphorylase                                                          | 72.7       | 293            | 2.00E-151 | 290          |
| AH43348_ORF_1213     | ATP-dependent_Clp_protease_proteolytic_subunit                                         | 72.59      | 197            | 1.00E-105 | 197          |
| AH43348_ORF_1315     | UDP-glucose_pyrophosphorylase                                                          | 72.7       | 293            | 2.00E-151 | 290          |
| ATCC11741_ORF_1065   | ATP-dependent_Clp_protease_proteolytic_subunit                                         | 72.59      | 197            | 1.00E-105 | 197          |
| ATCC11741_ORF_1147   | UDP-glucose_pyrophosphorylase                                                          | 72.7       | 293            | 2.00E-151 | 290          |
| CCuG27530B_ORF_1016  | ATP-dependent_Clp_protease_proteolytic_subunit                                         | 72.59      | 197            | 1.00E-105 | 197          |
| CCuG27530B_ORF_1100  | UDP-glucose_pyrophosphorylase                                                          | 72.7       | 293            | 2.00E-151 | 290          |
| CCuG38008_ORF_1126   | ATP-dependent_Clp_protease_proteolytic_subunit                                         | 72.59      | 197            | 1.00E-105 | 197          |
| CCuG38008_ORF_1209   | UDP-glucose_pyrophosphorylase                                                          | 72.7       | 293            | 2.00E-151 | 290          |
| CCuG44481_ORF_1134   | ATP-dependent_Clp_protease_proteolytic_subunit                                         | 72.59      | 197            | 1.00E-105 | 197          |
| CCuG44481_ORF_1217   | UDP-glucose_pyrophosphorylase                                                          | 72.7       | 293            | 2.00E-151 | 290          |
| CCuG45735_ORF_1169   | ATP-dependent_Clp_protease_proteolytic_subunit                                         | 72.59      | 197            | 1.00E-105 | 197          |
| CCuG45735_ORF_1251   | UDP-glucose_pyrophosphorylase                                                          | 72.7       | 293            | 2.00E-151 | 290          |
| CCuG47171_ORF_1127   | ATP-dependent_Clp_protease_proteolytic_subunit                                         | 72.59      | 197            | 1.00E-105 | 197          |
| CCuG47171_ORF_1233   | UDP-glucose_pyrophosphorylase                                                          | 72.7       | 293            | 2.00E-151 | 290          |
| CCuG47825_ORF_396    | polysaccharide_biosynthesis_protein_CpsF                                               | 73.63      | 91             | 5.00E-46  | 93           |
| CCuG47825_ORF_1465   | ATP-dependent_Clp_protease_proteolytic_subunit                                         | 72.59      | 197            | 1.00E-105 | 197          |
| CCuG47825_ORF_2004   | UDP-glucose_pyrophosphorylase                                                          | 72.35      | 293            | 7.00E-151 | 290          |
| CCuG47826_ORF_1150   | ATP-dependent_Clp_protease_proteolytic_subunit                                         | 72.59      | 197            | 1.00E-105 | 197          |
| CCuG47826_ORF_1339   | UDP-glucose_pyrophosphorylase                                                          | 72.35      | 293            | 7.00E-151 | 290          |
| CECT5713_ORF_1313    | ATP-dependent_Clp_protease_proteolytic_subunit                                         | 72.59      | 197            | 1.00E-105 | 197          |
| CECT5713_ORF_1425    | UDP-glucose_pyrophosphorylase                                                          | 72.7       | 293            | 2.00E-151 | 290          |
| cp400_ORF_1280       | ATP-dependent_Clp_protease_proteolytic_subunit                                         | 72.59      | 197            | 1.00E-105 | 197          |
| cp400_ORF_1413       | UDP-glucose_pyrophosphorylase                                                          | 73.04      | 293            | 4.00E-152 | 290          |
| DSM18933_ORF_62      | UDP-glucose_pyrophosphorylase                                                          | 73.04      | 293            | 7.00E-153 | 300          |
| DSM18933_ORF_219     | polysaccharide_biosynthesis_protein_CpsF                                               | 74.5       | 149            | 7.00E-86  | 149          |
| DSM18933_ORF_1644    | ATP-dependent_Clp_protease_proteolytic_subunit                                         | 73.58      | 193            | 1.00E-104 | 196          |
| DSM20492_ORF_1084    | ATP-dependent_Clp_protease_proteolytic_subunit                                         | 72.59      | 197            | 1.00E-105 | 197          |
| DSM20492_ORF_1168    | UDP-glucose_pyrophosphorylase                                                          | 72.7       | 293            | 2.00E-151 | 290          |
| DSM20492_ORF_1456    | polysaccharide_biosynthesis_protein_CpsF                                               | 75         | 132            | 5.00E-73  | 132          |
| DSM20554_ORF_1092    | ATP-dependent_Clp_protease_proteolytic_subunit                                         | 72.59      | 197            | 1.00E-105 | 197          |
| DSM20554_ORF_1174    | UDP-glucose_pyrophosphorylase                                                          | 72.7       | 293            | 2.00E-151 | 290          |
| DSM20554_ORF_1467    | polysaccharide_biosynthesis_protein_CpsF                                               | 75         | 132            | 5.00E-73  | 132          |
| DSM20555_ORF_1055    | ATP-dependent_Clp_protease_proteolytic_subunit                                         | 72.59      | 197            | 1.00E-105 | 197          |
| DSM20555_ORF_1138    | UDP-glucose_pyrophosphorylase                                                          | 72.7       | 293            | 2.00E-151 | 290          |
| GJ24_ORF_1096        | ATP-dependent_Clp_protease_proteolytic_subunit                                         | 72.59      | 197            | 1.00E-105 | 197          |
| GJ24_ORF_1189        | UDP-glucose_pyrophosphorylase                                                          | 72.7       | 293            | 2.00E-151 | 290          |
| gul1_ORF_1025        | ATP-dependent_Clp_protease_proteolytic_subunit                                         | 72.59      | 197            | 1.00E-105 | 197          |
| gul1_ORF_1107        | UDP-glucose_pyrophosphorylase                                                          | 72.7       | 293            | 2.00E-151 | 290          |
| gul2_ORF_1067        | ATP-dependent_Clp_protease_proteolytic_subunit                                         | 72.59      | 197            | 1.00E-105 | 197          |
| gul2_ORF_1150        | UDP-glucose_pyrophosphorylase                                                          | 72.7       | 293            | 2.00E-151 | 290          |
| JCM1040_ORF_1109     | ATP-dependent_Clp_protease_proteolytic_subunit                                         | 72.59      | 197            | 1.00E-105 | 197          |
| JCM1040_ORF_1192     | UDP-glucose_pyrophosphorylase                                                          | 72.7       | 293            | 2.00E-151 | 290          |
| JCM1042_ORF_1056     | ATP-dependent_Clp_protease_proteolytic_subunit                                         | 72.59      | 197            | 1.00E-105 | 197          |
| JCM1042_ORF_1141     | UDP-glucose_pyrophosphorylase                                                          | 72.7       | 293            | 2.00E-151 | 290          |
| JCM1044_ORF_1016     | ATP-dependent_Clp_protease_proteolytic_subunit                                         | 72.59      | 197            | 1.00E-105 | 197          |
| JCM1044_ORF_1100     | UDP-glucose_pyrophosphorylase                                                          | 72.7       | 293            | 2.00E-151 | 290          |
| JCM1045_ORF_1131     | ATP-dependent_Clp_protease_proteolytic_subunit                                         | 72.59      | 197            | 1.00E-105 | 197          |
| JCM1045_ORF_1214     | UDP-glucose_pyrophosphorylase                                                          | 72.7       | 293            | 2.00E-151 | 290          |
| JCM1046_ORF_1085     | ATP-dependent_Clp_protease_proteolytic_subunit                                         | 72.59      | 197            | 1.00E-105 | 197          |
| JCM1046_ORF_1167     | UDP-glucose_pyrophosphorylase                                                          | 73.04      | 293            | 4.00E-152 | 290          |
| JCM1046_ORF_1500     | polysaccharide_biosynthesis_protein_CpsF                                               | 75.17      | 149            | 9.00E-84  | 152          |
| JCM1047_ORF_1287     | ATP-dependent_Clp_protease_proteolytic_subunit                                         | 72.59      | 197            | 1.00E-105 | 197          |
| JCM1047_ORF_1370     | UDP-glucose_pyrophosphorylase                                                          | 72.7       | 293            | 2.00E-151 | 290          |
| JCM1230_ORF_1032     | ATP-dependent_Clp_protease_proteolytic_subunit                                         | 72.59      | 197            | 1.00E-105 | 197          |
| JCM1230_ORF_1160     | UDP-glucose_pyrophosphorylase                                                          | 72.7       | 293            | 2.00E-151 | 290          |
| L21_ORF_1211         | ATP-dependent_Clp_protease_proteolytic_subunit                                         | 72.59      | 197            | 1.00E-105 | 197          |
| L21_ORF_1294         | UDP-glucose_pyrophosphorylase                                                          | 72.7       | 293            | 2.00E-151 | 290          |
| LMG14476_ORF_1187    | ATP-dependent_Clp_protease_proteolytic_subunit                                         | 72.59      | 197            | 1.00E-105 | 197          |
| LMG14476_ORF_1272    | UDP-glucose_pyrophosphorylase                                                          | 72.7       | 293            | 2.00E-151 | 290          |
| LMG14477_ORF_1171    | ATP-dependent_Clp_protease_proteolytic_subunit                                         | 72.59      | 197            | 1.00E-105 | 197          |
| LMG14477_ORF_1256    | UDP-glucose_pyrophosphorylase                                                          | 72.7       | 293            | 2.00E-151 | 290          |
| NCIMB702343_ORF_1073 | ATP-dependent_Clp_protease_proteolytic_subunit                                         | 72.59      | 197            | 1.00E-105 | 197          |
| NCIMB702343_ORF_1158 | UDP-glucose_pyrophosphorylase                                                          | 72.7       | 293            | 2.00E-151 | 290          |
| NCIMB702343_ORF_1488 | polysaccharide_biosynthesis_protein_CpsF                                               | 77.14      | 140            | 7.00E-79  | 141          |
| NCIMB8816_ORF_1018   | ATP-dependent_Clp_protease_proteolytic_subunit                                         | 72.59      | 197            | 1.00E-105 | 197          |
| NCIMB8816_ORF_1141   | UDP-glucose_pyrophosphorylase                                                          | 72.7       | 293            | 2.00E-151 | 290          |
| NCIMB8816_ORF_1869   | cell_wall_surface_anchor_family_protein_Plasminogen-_and_Fibronectin-binding_protein_B | 70         | 110            | 4.00E-47  | 110          |
| NCIMB8817_ORF_1119   | ATP-dependent_Clp_protease_proteolytic_subunit                                         | 72.59      | 197            | 1.00E-105 | 197          |
| NCIMB8817_ORF_1201   | UDP-glucose_pyrophosphorylase                                                          | 72.7       | 293            | 2.00E-151 | 290          |
| NCIMB8818_ORF_1316   | ATP-dependent_Clp_protease_proteolytic_subunit                                         | 72.59      | 197            | 1.00E-105 | 197          |
| NCIMB8818_ORF_1399   | UDP-glucose_pyrophosphorylase                                                          | 72.7       | 293            | 2.00E-151 | 290          |
| NIAS840_ORF_276      | UDP-glucose_pyrophosphorylase                                                          | 72.7       | 293            | 2.00E-151 | 290          |
| NIAS840_ORF_577      | polysaccharide_biosynthesis_protein_CpsF                                               | 75         | 132            | 5.00E-73  | 132          |

|                  |                                                |       |     |           |     |
|------------------|------------------------------------------------|-------|-----|-----------|-----|
| NIAS840_ORF_1603 | ATP-dependent_Clp_protease_proteolytic_subunit | 72.59 | 197 | 1.00E-105 | 197 |
| Ren_ORF_1171     | ATP-dependent_Clp_protease_proteolytic_subunit | 72.59 | 197 | 1.00E-105 | 197 |
| Ren_ORF_1266     | UDP-glucose_pyrophosphorylase                  | 72.35 | 293 | 4.00E-150 | 290 |
| SMXD51_ORF_1498  | ATP-dependent_Clp_protease_proteolytic_subunit | 72.59 | 197 | 1.00E-105 | 197 |
| SMXD51_ORF_1595  | UDP-glucose_pyrophosphorylase                  | 72.7  | 293 | 2.00E-151 | 290 |
| UCC118_ORF_1257  | ATP-dependent_Clp_protease_proteolytic_subunit | 72.59 | 197 | 1.00E-105 | 197 |
| UCC118_ORF_1367  | UDP-glucose_pyrophosphorylase                  | 72.7  | 293 | 2.00E-151 | 290 |
